# Supplementary material for: Peptidoglycan Endopeptidase Spr of Uropathogenic Escherichia coli Contributes to Kidney Infections and Competitive Fitness During Bladder Colonization
Source: Front Microbiol. 2020 Dec 16;11:586214. doi: 10.3389/fmicb.2020.586214 (PMC7774453; doi:10.3389/fmicb.2020.586214)
Supplement: Supplementary file 2 [file Data_Sheet_2.xlsx]

## Sheet: Protein Report of LC-MS-MS
Supplementary Table S2
Protein Information					Normalized abundance
Protein Name	Protein_ID	Gene Symbol	pI	Mass (KDa)	UTI89 WT 1	UTI89 WT 2	UTI89 WT 3	UTI89 ∆spr 1	UTI89 ∆spr 2	UTI89 ∆spr 3
Protein YgiN	Q1R6W0	ygiN	6.24	11.5	0	0	0	1.79727e+06	2.60799e+06	723662
Inhibitor of vertebrate lysozyme	Q1RFV1	ykfE	6.77	16.9	0	0	0	638180	4.25993e+06	2.56804e+06
Cysteine desulfuration protein SufE	Q1RBB7	sufE	6.55	15.8	0	0	0	946778	995240	445020
Uncharacterized protein	Q1R7D5	ygfX	10.98	16.1	0	913373	0	1.44381e+06	2.25081e+06	1.03867e+06
Probable lipoprotein NlpC	Q1RB87	nlpC	9.25	17.3	0	0	0	176237	652298	464779
Thioredoxin 1	Q1R4F8	trxA	5.29	16	0	0	0	2.02035e+06	3.97133e+06	1.37326e+06
Potential molybdenum-pterin-binding-protein	Q1R7W7	UTI89_C3095	7.44	15.9	0	0	0	446087	766044	639186
Acid stress chaperone HdeB	Q1R595	hdeB	7.12	12.5	0	0	113806	343037	5.39226e+06	1.47861e+06
Uncharacterized protein	Q1R6F7	yhbY	9.38	10.8	0	0	0	468428	940841	400741
Branched-chain-amino-acid aminotransferase	Q1R4G7	ilvE	5.8	34.1	0	0	0	646928	1.15162e+06	829969
50S ribosomal protein L24	Q1R619	rplX	10.21	11.3	0	4.10122e+06	3.33573e+06	374724	2.39421e+07	2.31818e+07
30S ribosomal protein S19	Q1R609	rpsS; AL524_RS00870	10.52	10.4	0	0	7745.66	1.98107e+06	1.64914e+07	8.29562e+06
30S ribosomal protein S20	Q1RGH9	rpsT	11.18	9.7	0	652782	0	4.62715e+06	3.02655e+07	1.45734e+07
Putative acyl-CoA thioester hydrolase YciA	Q1RCI1	yciA	7.88	14.2	0	484706	0	740178	793776	297549
Putative oligopeptide ABC transporter	Q1R3I5	UTI89_C4671	8.19	33.4	0	381660	0	299676	364439	198960
UPF0482 protein YnfB	Q1RBL6	ynfB	9.25	13	0	443227	524612	645741	1.13231e+06	545286
Uncharacterized protein	Q1R3F5	phnB	5.2	16.1	0	0	258800	360492	523413	361321
Uncharacterized protein	Q1R847	UTI89_C3011	9.41	12.2	0	0	0	792032	1.10564e+06	0
Cell division topological specificity factor	Q1RCS3	minE	5.24	10.2	0	0	0	931398	1.10739e+06	0
Hypothetical membrane protein YliF	Q1RE91	yliF	7.9	49.8	0	0	87433.5	323610	439515	80053.7
Glucanase	Q1R572	yhjM	8.54	42	0	0	2.48037e+06	455432	1.94933e+06	1.47178e+06
HTH-type transcriptional regulator IscR	Q1R8K1	iscR	7.34	17.3	0	0	1.15713e+06	373350	484515	1.77385e+06
IroC protein	Q1RDF9	iroC	7.71	136.3	0	372817	1.16869e+06	2.31521e+06	1.6112e+06	315337
Acylphosphatase	Q1RDP4	UTI89_C1035	9.88	14.8	0	0	0	1.54429e+06	2.60192e+06	0
Sulfate adenylyltransferase subunit 1	Q1R7U0	cysN	5.12	52.5	0	61523.7	818229	2.94262e+06	911770	174769
Predicted major capsid protein	Q1RDZ2	UTI89_C0937	6.43	39.2	0	543683	188239	436346	788733	244902
UPF0325 protein YaeH	Q1RG25	yaeH	7.18	15.1	0	1.66812e+06	504775	1.81912e+06	2.22822e+06	843399
Probable membrane protein YbiO	Q1REB7	ybiO	9.19	82.9	0	461673	417845	1.07311e+06	891899	0
Outer membrane pore protein E	Q1RFS9	phoE	5.21	39.2	0	0	3.39892e+06	2.57227e+06	0	0
Bicyclomycin resistance protein transmembrane protein	Q1R9N7	bcr	9.79	43.3	0	197695	188478	116209	117607	165573
Multidrug resistance-like ATP-binding protein mdlA	Q1RF87	mdlA	6.7	66	0	445034	643728	343345	337892	260186
Arginine-binding periplasmic protein 1	Q1RE62	artI	6.1	26.9	0	1.26092e+06	1.06264e+06	818149	363378	1.06511e+06
Succinate dehydrogenase cytochrome b-556 subunit	Q1REK4	sdhC	9.86	15	0	505485	689499	384984	0	260321
Para-aminobenzoate synthase component I	Q1RAY0	pabB	5.24	50.9	0	582818	235757	184078	0	0
L-rhamnonate dehydratase	Q1R9G8	yfaW	6.13	44.6	0	1.29939e+06	0	489354	0	0
Hypothetical ABC transporter ATP-binding protein yddO	Q1R3I6	yddO	7.74	26.4	0	0	0	677588	0	0
Histidine kinase	Q1R8Q9	narQ	6.81	64.2	0	1.11206e+06	1.40599e+06	639018	355873	292373
Sensor protein CreC	Q1R242	creC	8.97	52.2	0	776448	1.75167e+06	572090	376512	0
Hypothetical lipoprotein	Q1R4C6	yifL	8.79	7.2	144928	1.59203e+07	35488072	2.02494e+07	3.26288e+07	4.22981e+07
Heat shock protein HslJ	Q1RC14	hslJ	7.87	15.6	817887	2.4604e+06	1467528	1.80293e+07	2.99966e+07	2.27556e+07
TonB-dependent enterochelin uptake protein	Q1R6Z2	exbD	4.88	15.5	263790	0	239141	4.8231e+06	7.78926e+06	2.04803e+06
Uncharacterized protein	Q1R9Z1	yegP	9.6	13.5	1.83111e+06	9.13179e+06	3.1695e+06	2.9301e+07	6.50951e+07	3.60342e+07
Uncharacterized protein	Q1R7N0	UTI89_C3182	5.97	8.3	2.40711e+06	9.03266e+06	3.18201e+06	3.23506e+07	1.16551e+08	4.74539e+07
10 kDa chaperonin	Q1R3B7	groES	5.24	10.4	930208	3.16481e+06	3.59349e+06	1.21224e+07	2.26575e+07	1.83966e+07
Chaperone modulatory protein CbpM	Q1RDL7	yccD	5.16	11.4	147430	1.26627e+06	0	1.90746e+06	3.53975e+06	482044
Uncharacterized protein	Q1RDP8	UTI89_C1031	5.96	17.7	684143	1.88453e+06	0	8.70123e+06	9.00455e+06	2.04142e+06
Osmotically inducible protein OsmC	Q1RBT5	osmC	5.86	15.1	448745	1.45431e+06	2.46019e+06	5.39877e+06	9.58154e+06	7.79637e+06
Uncharacterized protein	Q1R330	ytfP	6.95	12.9	305960	845293	0	3.67743e+06	3.7018e+06	1.78368e+06
Protein TonB	Q1RCX6	UTI89_C1306	10.23	14.6	854548	1.0657e+06	648115	1.00095e+07	2.24123e+07	3.24196e+06
Uncharacterized protein	Q1R3B5	yjeI	5.78	13.1	3.96367e+06	1.70024e+07	4.27975e+06	4.2346e+07	8.98106e+07	3.21567e+07
Protein CreA	Q1R244	creA	8.95	17.1	430995	9.68308e+06	2.87077e+06	4.18864e+06	1.17469e+07	1.00207e+07
Putative oxygen independent coproporphyrinogen III oxidase	Q1R5A1	chuW	6.79	49.5	87032.1	580468	134660	838525	105899	96185.4
Uncharacterized protein	Q1R6N0	yqjK	11.94	11.8	1.203e+06	3.49678e+06	1.17411e+06	1.15201e+07	2.35802e+07	6.25845e+06
Integration host factor subunit beta	Q1RDU6	ihfB	9.35	10.6	475922	2.0622e+06	190236	4.52572e+06	1.24474e+07	3.61647e+06
Uncharacterized protein	Q1R8X2	yfeA	8.44	85.7	213844	3.8529e+06	4.3058e+06	1.95367e+06	1.81368e+06	1.84262e+06
Small heat shock protein IbpA	Q1R4P9	ibpA	5.83	16	1.32596e+06	2.5923e+06	1.27424e+06	1.11856e+07	1.62369e+07	9.4865e+06
D-alanyl-D-alanine carboxypeptidase fraction B	Q1R6F5	dacB	8.79	51.8	9.64961e+06	1.36159e+07	1.80181e+07	7.53355e+07	1.68514e+07	1.44204e+07
50S ribosomal protein L18	Q1R626	rplR; AB185_RS09485	10.42	12.8	903615	1.01943e+07	5.26367e+06	6.92084e+06	3.5288e+07	1.98324e+07
Uncharacterized protein	Q1RDI2	UTI89_C1098	6.98	74.8	51968.2	182143	458085	388367	286901	65184.1
30S ribosomal protein S14	Q1R621	rpsN	11.17	11.6	1.15735e+06	8.23126e+06	5.37363e+06	8.30271e+06	2.9562e+07	1.10591e+07
Putative toxin of osmotically regulated toxin-antitoxin system associated with programmed cell death	Q1R3B0	ecnB	8.21	4.8	2.7944e+06	3.52587e+06	1.33208e+07	1.99567e+07	7.87063e+07	2.21611e+07
Multidrug resistance-like ATP-binding protein mdlB	Q1RF86	mdlB	7.59	69.6	210547	1.17671e+06	1.95813e+06	1.42476e+06	1.2016e+06	661178
50S ribosomal protein L7/L12	Q1R5V1	rplL	4.65	12.3	3.9492e+06	7.46375e+06	4.90255e+06	2.62575e+07	5.91807e+07	3.41142e+07
Uncharacterized protein	Q1RB68	yniB	7.44	20.4	982194	4.67245e+06	767473	6.24695e+06	1.07164e+07	8.48441e+06
50S ribosomal protein L25	Q1R9N4	rplY	9.45	14.4	2.01156e+06	1.19619e+06	501638	1.26968e+07	3.85626e+07	1.53251e+07
Sensor protein QseC	Q1R6W6	qseC	5.47	50.2	134442	820692	610527	828144	889237	159125
30S ribosomal protein S15	Q1R6H3	rpsO	10.4	10.3	931851	1.8199e+06	958761	5.56678e+06	2.04867e+07	5.20692e+06
Uncharacterized protein	Q1RCC0	UTI89_C1516	8.15	11.9	1.02641e+06	1.50368e+06	564096	5.87242e+06	1.47185e+07	6.68021e+06
50S ribosomal protein L27	Q1R6F2	rpmA	10.58	9.1	558289	992135	0	3.1294e+06	5.76817e+06	2.46166e+06
Uncharacterized protein	Q1R8C3	yfiL	5.54	14	872479	4.50268e+06	1.50144e+06	4.88992e+06	7.39849e+06	4.23178e+06
Proline-specific permease ProY	Q1RFD9	proY	9.61	50.3	604423	3.65156e+06	718660	3.3456e+06	0	4.15275e+06
Phosphoadenosine phosphosulfate reductase	Q1R7T6	cysH	5.91	28	349333	0	767906	1.89392e+06	867468	853622
Sulfite reductase [NADPH] flavoprotein alpha-component	Q1R7T4	cysJ	5.02	66.3	483203	51527.7	509342	2.47853e+06	367635	0
Possible kinase regulator	Q1REF7	ybhB	5.66	17.1	294056	437482	204749	1.48412e+06	1.34107e+06	1.43692e+06
50S ribosomal protein L21	Q1R6F0	rplU; LG71_RS25305	9.85	11.6	5.05834e+06	1.40453e+07	1.01875e+07	2.54708e+07	8.15179e+07	4.06761e+07
Ribosome-binding factor A	Q1R6H1	rbfA	6.2	15.1	2.90945e+06	2.98462e+06	3.29142e+06	1.41246e+07	2.35072e+07	1.38623e+07
Uncharacterized protein	Q1R371	yjfO	9.99	16.1	2.05928e+06	4.69177e+06	3.10007e+06	9.82395e+06	2.03314e+07	8.93458e+06
Uncharacterized protein	Q1R2G5	yjiN	8.81	49.7	3.45061e+06	3.41479e+06	3.676e+06	1.61356e+07	1.96854e+07	2.70511e+07
ATP synthase epsilon chain	Q1R4K3	atpC	5.72	15.1	3.79299e+06	5.39518e+07	2.22499e+07	1.77341e+07	7.6007e+07	7.54971e+07
Protein YcgK	Q1RCR8	ycgK	9.41	14.8	1.51096e+06	1.0357e+07	1.60008e+07	7.01584e+06	4.27083e+07	3.46381e+07
Thiol peroxidase	Q1R8P7	bcp	5.24	17.6	335037	2.88969e+06	639219	1.51018e+06	1.70971e+06	807342
Putative F17-like fimbrial usher	Q1R2V6	UTI89_C4905	6.9	94.9	209291	479680	351870	925811	321403	304779
50S ribosomal protein L23	Q1R606	rplW	9.94	11.2	938603	1.31539e+06	942370	4.07858e+06	8.31573e+06	4.98954e+06
Ecotin	Q1R9K8		7.12	18.2	413495	663795	1064457	1.78676e+06	1.21315e+06	1.13071e+06
Uncharacterized protein	Q1R838	ygaU	6	16.1	4.26568e+08	1.0471e+09	1.13691e+09	1.76333e+09	2.34491e+09	1.66568e+09
Uncharacterized protein	Q1RBF6	ydhA	8.16	12.6	460715	0	199302	1.88947e+06	1.25378e+07	7.57706e+06
Uncharacterized protein	Q1RFD4	yajC	9.35	13	1.06857e+07	6.08355e+06	3.33013e+06	4.32085e+07	1.12724e+08	6.00757e+07
30S ribosomal protein S16	Q1R8B6	rpsP	9.98	11.4	1.04613e+06	1.34686e+06	563016	4.18617e+06	2.03432e+07	3.49307e+06
Dipeptide transport ATP-binding protein DppD	Q1R556	dppD	6.61	35.8	1.36985e+06	5.90239e+06	2.34654e+06	5.32651e+06	3.72164e+06	2.75263e+06
Lipopolysaccharide 1,2-glucosyltransferase	Q1R4W5	rfaJ	8.59	38.4	5.77529e+06	5.75452e+06	7.24907e+06	2.23554e+07	8.59943e+06	8.49436e+06
UPF0265 protein YeeX	Q1RA64	yeeX	9.13	15.1	3.2543e+06	9.38286e+06	7.50099e+06	1.21435e+07	4.20579e+07	2.00687e+07
Universal stress protein	Q1R5C1	uspA; AL524_RS01825	5.29	16.1	2.18774e+07	2.92923e+07	1.35399e+07	8.16338e+07	1.45911e+08	6.27664e+07
Isocitrate dehydrogenase kinase/phosphatase	Q1R3T1	aceK	6.57	67.2	762242	948742	2.59604e+06	2.78338e+06	1.03481e+06	0
30S ribosomal protein S10	Q1R601	rpsJ	9.69	11.7	4.66958e+07	6.37546e+07	3.05847e+07	1.69959e+08	3.43079e+08	1.75034e+08
Fumarate reductase subunit C	Q1R3A5	frdC	9.74	15	3.95063e+06	5.07624e+06	5.42877e+06	1.43555e+07	6.00448e+07	2.20975e+07
Xaa-Pro dipeptidase	Q1R465	pepQ	5.99	50.2	708590	2.68349e+06	3.9661e+06	2.5393e+06	2.20652e+06	1.10494e+06
CDP-diacylglycerol--glycerol-3-phosphate 3-phosphatidyltransferase	Q1RAM8	pgsA	8.81	20.7	163869	425794	727958	586383	0	0
Probable protein kinase UbiB	Q1R475	ubiB	8.94	63.2	9.37514e+06	2.00846e+07	2.5473e+07	3.26136e+07	2.36539e+07	1.35297e+07
Uncharacterized protein	Q1R6M7	yhaH	9.58	15.2	1.3001e+07	1.71909e+07	13197807	4.45822e+07	8.3953e+07	4.15574e+07
Ribosomal RNA small subunit methyltransferase F	Q1RAV2		6.13	53.2	233901	1.15492e+06	613690	801796	536349	0
Uncharacterized protein	Q1RBS7	yddB	6.23	89.1	674230	2.48028e+06	4.85568e+06	2.3135e+06	2.16572e+06	1.37345e+06
Guanosine-5'-triphosphate,3'-diphosphate pyrophosphatase	Q1R4G0		6.25	54.9	911425	5.89469e+06	2.96102e+06	3.06741e+06	457163	0
Universal stress protein UspG	Q1REV4	uspG	6.86	17.4	7.58184e+06	1.52734e+07	3.77659e+06	2.53382e+07	2.18925e+07	9.89335e+06
Uncharacterized protein	Q1R5F3	yhhM	10.07	13.5	1.33729e+06	1.66585e+06	1.27468e+06	4.42535e+06	7.90002e+06	4.67533e+06
IroD protein	Q1RDG0	iroD	6.52	44.6	329028	1.73228e+06	1.13958e+06	1.08547e+06	102303	461009
UPF0149 protein YgfB	Q1R7C1	ygfB	4.35	21.5	560461	695927	707053	1.80921e+06	308805	0
Uncharacterized protein	Q1RE56	ybjT	9.31	56.6	1.95429e+06	4.32208e+06	7.03604e+06	6.26589e+06	5.39991e+06	3.92479e+06
3-octaprenyl-4-hydroxybenzoate carboxy-lyase	Q1R469	yigC	5.5	55.6	1.37668e+06	2.95537e+06	6.49392e+06	4.36858e+06	4.14657e+06	3.13929e+06
ATP-dependent RNA helicase DeaD	Q1R6H8	deaD	8.44	73.2	401075	730247	127346	1.26577e+06	641955	0
Outer membrane usher protein PapC	Q1R2W8	papC	6.61	91.5	500482	1.66237e+06	3.48092e+06	1.56679e+06	1.78426e+06	4.13493e+06
Phospho-N-acetylmuramoyl-pentapeptide-transferase	Q1RGA8	mraY	9.63	39.8	873969	2.81811e+06	3.47865e+06	2.73572e+06	2.40749e+06	3.77881e+06
Homoserine kinase	Q1RGK1	thrB	5.66	33.6	4.42818e+06	3.64769e+06	3.59589e+06	1.37768e+07	6.88746e+06	3.61682e+06
Catalase	Q1RB63	katE	5.88	84.1	7.10597e+06	1.26406e+07	1.633e+07	2.19829e+07	1.79149e+07	1.1404e+07
Nitrate reductase 1, cytochrome b(NR), gamma subunit	Q1RCK8	narI	9.76	25.5	1.3514e+06	2.1011e+06	2.25057e+06	4.12466e+06	9.5337e+06	4.70107e+06
Transcriptional regulator SlyA	Q1RBF3	slyA	8.21	16.6	2.53233e+06	6.57158e+06	3.70162e+06	7.71897e+06	5.99766e+06	3.08746e+06
Sensor protein	Q1REZ4	cusS	6.37	53.7	115109	99073.1	95727.9	350321	472582	0
Putative transport	Q1R965	yfdC	5.39	34.5	3.25651e+06	8.12698e+06	6.23475e+06	9.83477e+06	5.74767e+06	7.96074e+06
50S ribosomal protein L28	Q1R4V5	rpmB	11.41	9	2.22494e+06	2.75713e+06	1.29916e+06	6.69635e+06	1.32132e+07	6.00236e+06
30S ribosomal protein S8	Q1R622	rpsH; AL524_RS25290	9.42	14.1	3.58549e+07	6.71254e+07	2.77125e+07	1.07911e+08	1.1515e+08	5.94836e+07
Flagellar regulator flk	Q1R991	flk	9.33	36.6	352340	0	161496	1.05853e+06	604434	0
Bifunctional aspartokinase/homoserine dehydrogenase	Q1RGK2	thrA	5.68	89.1	4.85637e+07	4.14555e+07	3.41105e+07	1.45884e+08	6.16812e+07	2.05685e+07
Phage shock protein A	Q1RC62	pspA	5.49	25.5	3.49095e+06	7.20566e+06	1.04108e+07	1.03161e+07	1.14612e+07	1.57859e+07
Cryptic nitrate reductase 2, beta subunit	Q1RBV1	narY	5.92	58.5	1.26421e+07	2.31119e+07	4.02649e+07	3.73606e+07	3.15054e+07	1.70681e+07
Lysine decarboxylase, constitutive	Q1RG03	ldcC	5.58	80.4	2.8452e+06	3.8289e+06	5.159e+06	8.38789e+06	5.77734e+06	2.58173e+06
Protein-export protein SecB	Q1R4Y5		4.37	17.3	5.38233e+06	6.65069e+06	2.31537e+06	1.54952e+07	1.33663e+07	8.3998e+06
50S ribosomal protein L22	Q1R610	rplV; CSK29544_RS06440; AL524_RS00865	10.23	12.2	1.94751e+08	2.84139e+08	2.628e+08	5.59449e+08	9.28253e+08	5.45349e+08
Putative regulator	Q1R3N2	UTI89_C4624	6.86	38.8	594715	370932	1.07346e+06	1.70253e+06	451143	1.50753e+06
L-threonine dehydratase	Q1R4G5	ilvA	5.96	56.3	2.85748e+06	5.67442e+06	5.50875e+06	8.16857e+06	4.17897e+06	1.8244e+06
Beta-galactosidase	Q1RFJ2	lacZ	5.38	116.4	500913	1.71709e+06	0	1.42582e+06	940127	0
Putative sporulation protein	Q1RCQ8	ycgB	6	60.8	7.06208e+06	1.02079e+07	9.8034e+06	2.00877e+07	6.69748e+06	4.76627e+06
Uncharacterized protein	Q1R8A0	UTI89_C2958	6.52	10.8	1.0192e+06	0	0	2.88609e+06	7.80618e+06	2.30497e+06
Uncharacterized protein	Q1RF40	ybbJ	7.71	16.9	2.18133e+06	3.65971e+06	2.54398e+06	6.12865e+06	7.29179e+06	4.64822e+06
Transcriptional repressor NrdR	Q1RFC8	nrdR	7.8	17.2	816210	2.35624e+06	202928	2.28738e+06	810927	0
DNA-binding protein HU-alpha (HU-2)	Q1R5W6	hupA	9.58	9.5	817038	1.11682e+06	0	2.26868e+06	9.56317e+06	2.67806e+06
Transport ATP-binding protein CydC	Q1RE28	cydC	8.27	62.9	9.12604e+06	1.74264e+07	2.49739e+07	2.53263e+07	1.50948e+07	1.27413e+07
30S ribosomal protein S18	Q1R358	rpsR; DDA3937_RS17220	10.59	9	1.81454e+06	1.03241e+06	1.72768e+06	4.9351e+06	1.80486e+07	6.64146e+06
Putative iron compound receptor	Q1R6V4	UTI89_C3463	5.31	78.6	767512	1.46311e+06	3.3394e+06	2.0776e+06	4.26241e+06	522715
Cardiolipin synthase C	Q1RDB3	ymdC	9.03	55.9	2.04964e+06	3.92307e+06	5.70715e+06	5.5469e+06	3.69844e+06	2.81297e+06
Uncharacterized protein	Q1R6A7	yhcB	5.88	15	1.45473e+08	2.21645e+08	1.67781e+08	3.88883e+08	5.83305e+08	4.17932e+08
Putative inner membrane ABC-transporter	Q1RAG2	ybtP	9.19	66.2	1.91994e+07	2.79849e+07	4.26054e+07	5.12591e+07	4.5369e+07	2.29136e+07
30S ribosomal protein S6	Q1R360	rpsF	5.39	15.2	1.19817e+07	1.63284e+07	2.41381e+07	3.17203e+07	5.54659e+07	3.12957e+07
Multidrug resistance protein MdtC	Q1R9Z5	yegO	8.73	110.9	890178	785236	1.25131e+06	2.3581e+06	1.76782e+06	301284
N-succinylglutamate 5-semialdehyde dehydrogenase	Q1RB47	astD	6.05	53.1	2.23009e+07	2.36784e+07	2.50168e+07	5.85132e+07	2.01773e+07	5.53602e+06
Mechanosensitive channel protein KefA	Q1RF71	kefA	7.84	127.1	3.57512e+06	6.42337e+06	7.12825e+06	9.28913e+06	4.93682e+06	4.16878e+06
Peptide transport periplasmic protein SapA	Q1RC65	sapA	6.92	61.4	5.10447e+06	1.10005e+07	1.63005e+07	1.32464e+07	7.9519e+06	5.56594e+06
Nucleoside diphosphate kinase	Q1R8L4	ndk	5.81	15.4	7.86279e+06	5.11003e+06	1.37641e+06	2.02249e+07	1.68661e+07	9.67934e+06
Hypothetical lipoprotein YddW	Q1RBT1	yddW	8.91	49.6	4.66102e+06	4.29552e+06	9.30169e+06	1.20021e+07	1.25091e+07	9.33581e+06
S fimbriae outer membrane usher	Q1RDG8	sfaF	7.59	97.8	1.09548e+06	2.61086e+06	4.09583e+06	2.81102e+06	3.18323e+06	2.4303e+06
Uncharacterized protein	Q1RBQ2	UTI89_C1734	6.01	15.6	785361	211640	0	1.99284e+06	1.75784e+06	954384
30S ribosomal protein S17	Q1R616	rpsQ; CSK29544_RS06460; AB182_RS27780	9.6	9.7	5.35377e+06	5.44326e+06	3.16543e+06	1.3625e+07	2.59869e+07	1.06386e+07
Yersiniabactin siderophore biosynthetic protein	Q1RAF6	ybtE	5.49	57.3	5.12269e+07	5.5102e+07	5.77084e+07	1.29442e+08	5.35188e+07	2.72285e+07
Fe-S subunit oxidoreductase	Q1RBL0	ynfG	6.19	22.7	2.79418e+06	8.13507e+06	6.43366e+06	7.04006e+06	7.8524e+06	8.08958e+06
Uncharacterized protein	Q1R2A6	UTI89_C5108	8.57	16.1	2.01617e+06	6.17382e+06	2.89925e+06	5.02262e+06	5.48573e+06	6.28827e+06
Uncharacterized protein	Q1RCK4	ychK	6.73	34.3	658187	386626	0	1.64182e+06	1.06208e+06	0
Endolytic murein transglycosylase	Q1RD58	yceG	9.38	38.2	3.05134e+06	2.38714e+06	5.7898e+06	7.58842e+06	9.08204e+06	8.57194e+06
Bifunctional long-chain fatty acids transporter	Q1R968	fadL	5.4	48.7	1.57874e+08	3.94626e+08	8.21545e+08	3.90674e+08	3.51709e+08	4.26345e+08
dTDP-glucose 4,6-dehydratase	Q1R4E9	rffG	5.9	39.7	541866	479556	0	1.33491e+06	546433	0
Multidrug resistance protein MdtB	Q1R9Z6	yegN	5.48	112	1.80643e+06	3.28626e+06	3.1058e+06	4.44093e+06	6.23958e+06	750949
Putative dimethyl sulfoxide reductase chain YnfE	Q1RBL2	ynfE	8.13	89.5	1.63382e+06	2.29554e+06	3.42576e+06	4.0086e+06	4.03157e+06	321314
Periplasmic serine endoprotease DegP-like	Q1RG27	degP	8.56	49.3	2.99338e+08	5.13704e+08	5.14597e+08	7.10622e+08	6.86821e+08	4.22198e+08
Universal stress protein	Q1R3Z5	yiiT	6.87	16.3	1.91269e+06	1.50721e+06	3.32592e+06	4.51932e+06	8.1563e+06	6.9075e+06
Putative peptide synthetase-like protein	Q1RAG0	irp2	6.21	229.1	6.08194e+07	5.10278e+07	6.07527e+07	1.43347e+08	9.25987e+07	3.60093e+07
Fatty acid oxidation complex subunit alpha	Q1R972	fadJ	8.47	77.1	1.59258e+06	1.19011e+06	669343	3.7558e+06	2.275e+06	1.01434e+06
6,7-dimethyl-8-ribityllumazine synthase	Q1RFC6	ribH	9.55	19.8	1.03305e+07	1.13803e+07	6.38822e+06	2.42323e+07	1.98401e+07	1.83772e+07
Phosphotransferase RcsD	Q1R9J9	yojN	5.19	100.3	1.06471e+07	1.64609e+07	1.70367e+07	2.49882e+07	1.92609e+07	1.06157e+07
Uncharacterized protein	Q1R9E7	elaB	5.57	11.3	4.13644e+08	5.26641e+08	4.76014e+08	9.68574e+08	1.42593e+09	1.02532e+09
Undecaprenyl-phosphate alpha-N-acetylglucosaminyl 1-phosphate transferase	Q1R4F3	rfe	9.99	40.9	420717	1.14399e+06	1.86729e+06	985190	1.05168e+06	362963
Succinylornithine transaminase	Q1RB45	astC	6.07	43.5	7.1598e+06	6.75021e+06	8.21346e+06	1.67612e+07	8.25392e+06	5.66281e+06
Hypothetical ABC transporter ATP-binding protein yhiH	Q1R5C8	yhiH	6.32	100.6	1.17908e+07	1.77559e+07	2.15627e+07	2.75199e+07	1.61489e+07	9.23231e+06
Putative AraC type regulator	Q1RAG1	UTI89_C2182	8.16	35.8	473763	0	0	1.10584e+06	0	0
Glycerol-3-phosphate acyltransferase	Q1R3P5	plsB	8.51	93.6	1.0328e+08	1.57959e+08	1.79666e+08	2.3923e+08	1.8891e+08	1.22247e+08
Putative ABC transporter protein	Q1RAG3	UTI89_C2180	7.71	67.7	1.38162e+07	2.22682e+07	4.53699e+07	3.17149e+07	3.61331e+07	2.20326e+07
Low affinity potassium transport system protein kup	Q1R4I5	trkD	9.01	69.2	2.14993e+06	3.31675e+06	4.70154e+06	4.91069e+06	3.64811e+06	4.24696e+06
Glutamine--fructose-6-phosphate aminotransferase [isomerizing]	Q1R4K6	glmS	5.87	66.8	2.07956e+08	2.21727e+08	1.32195e+08	4.74556e+08	1.79479e+08	5.02075e+07
1,4-alpha-glucan branching enzyme GlgB	Q1R5J4	glgB	6.39	84.3	2.57265e+06	3.60594e+06	5.8205e+06	5.86303e+06	4.72272e+06	3.40966e+06
Formate hydrogenlyase transcriptional activator	Q1R7W8	fhlA	6.06	79.9	868085	882459	319961	1.95706e+06	576549	534178
Glycerol-3-phosphate dehydrogenase	Q1R5K9	glpD	7.44	57.3	1.4796e+07	2.9517e+07	3.77529e+07	3.32892e+07	3.08261e+07	1.76662e+07
Ribonucleoside-diphosphate reductase	Q1R823	nrdE	6.47	80.3	4.77565e+06	4.24322e+06	4.04607e+06	1.0756e+07	5.16788e+06	691924
Threonine synthase	Q1RGK0	thrC	5.4	47	1.74493e+07	2.20204e+07	1.06432e+07	3.90891e+07	1.47844e+07	5.12113e+06
Uncharacterized protein	Q1R3L4	yjbQ	7.02	15.6	129999	0	197806	290484	1.7703e+06	1.30631e+06
Rod shape-determining protein MreC	Q1R690	mreC	8.41	39.6	2.09771e+06	4.3643e+06	4.35522e+06	4.67031e+06	5.25885e+06	3.3864e+06
Outer membrane lipoprotein SlyB	Q1RBF4	slyB	8.84	15.6	5.57082e+08	6.19261e+08	7.15992e+08	1.23213e+09	1.61235e+09	1.73465e+09
Outer membrane protein assembly factor BamE	Q1R8A7	smpA	8.51	12.3	6.93838e+06	3.32954e+06	4.17297e+06	1.53549e+07	4.13031e+07	3.10172e+07
Phosphoenolpyruvate-protein phosphotransferase ptsP	Q1R7I4	ptsP	5.78	83.7	7.36368e+06	1.06008e+07	7.48649e+06	1.61882e+07	8.28759e+06	4.31081e+06
Long chain fatty acid CoA-ligase	Q1RAY9	fadD	6.61	64.7	1.37774e+07	1.33877e+07	1.93411e+07	2.98331e+07	2.50201e+07	1.83692e+07
Cyclic di-GMP binding protein	Q1R571	yhjN	6.58	89.6	6.09462e+07	6.62098e+07	8.95855e+07	1.31881e+08	8.87225e+07	5.86197e+07
Cytochrome o ubiquinol oxidase subunit I	Q1RFA8	cyoB	7.2	74.3	2.78414e+07	7.1304e+07	1.214e+08	6.02426e+07	5.23826e+07	4.83701e+07
Probable large subunit, hydrogenase-2	Q1R701	hybC	6.28	62.5	7.27611e+07	1.13678e+08	1.70157e+08	1.5704e+08	1.46072e+08	8.55508e+07
Uncharacterized protein	Q1R687	yhdA	8.54	73.4	1.1825e+07	3.12151e+07	2.92561e+07	2.53997e+07	3.27438e+07	2.54335e+07
Histidine kinase	Q1RCL4	narX	6.73	67.1	1.32124e+06	2.64999e+06	3.92918e+06	2.8238e+06	2.60692e+06	916144
Uncharacterized protein	Q1RBC8	ydhS	5.17	60.7	1.29313e+07	1.02176e+07	8.81583e+06	2.74232e+07	9.37966e+06	3.60529e+06
23S rRNA (uracil(1939)-C(5))-methyltransferase RlmD	Q1R7Q7	rumA	7.9	48	607446	1.39396e+06	949584	1.28309e+06	348515	263277
FhuE receptor	Q1RD53	fhuE	5	81.3	774794	2.46393e+06	3.57001e+06	1.62968e+06	3.26727e+06	915009
Putative amidase	Q1RAD4	UTI89_C2212	7.23	54.5	514965	1.17029e+06	462006	1.0811e+06	541895	0
Glucans biosynthesis protein G	Q1RDB0	mdoG	8.06	58.6	9.52423e+06	1.39255e+07	2.20063e+07	1.99348e+07	1.64753e+07	9.65883e+06
Anaerobic dimethyl sulfoxide reductase chain A	Q1RDW2	dmsA	6.83	90.4	6.39532e+07	9.05748e+07	9.15185e+07	1.33886e+08	1.22309e+08	6.28125e+07
Acyl-CoA dehydrogenase	Q1RFV0	fadE	8.44	92	8.37018e+07	9.67247e+07	1.6391e+08	1.74416e+08	1.45012e+08	9.36314e+07
Uncharacterized protein	Q1R4Z5	yibL	9.5	13.7	395706	915608	721565	820097	2.13672e+06	2.02553e+06
Beta-D-glucoside glucohydrolase	Q1R9U0	bglX	6.1	83.5	173414	574130	317948	358973	366803	0
3-ketoacyl-CoA thiolase	Q1R467	fadA	6.8	40.8	3.27805e+06	4.1087e+06	3.02451e+06	6.77481e+06	2.43325e+06	1.10075e+06
50S ribosomal protein L17	Q1R638	rplQ; APT61_RS02185; GLAD_RS12970	11.05	14.4	1.08256e+08	2.88861e+08	2.24365e+08	2.24463e+08	4.26805e+08	3.59325e+08
UPF0229 protein YeaH	Q1RB08	yeaH	7.05	49.4	8.36026e+06	8.533e+06	8.51711e+06	1.7154e+07	7.53018e+06	2.68964e+06
Formate hydrogenlyase subunit 5	Q1R7X8	hycE	6.6	64.9	136351	177934	104697	280153	194406	0
L-seryl-tRNA(Sec) selenium transferase	Q1R503	selA	6.48	50.7	1.02595e+06	1.5438e+06	855965	2.10325e+06	502633	724707
Uncharacterized protein	Q1R5N9	yrfF	6.27	79.4	1.01752e+07	9.31065e+06	1.3363e+07	2.0788e+07	1.60763e+07	4.37132e+06
Enterochelin esterase	Q1REX8	fes	6.24	45.6	1.64245e+06	1.07729e+06	1.09263e+06	3.3586e+06	998606	380222
Endo-type membrane-bound lytic murein transglycosylase A	Q1RCQ2		9.13	22.2	4.62292e+06	5.59177e+06	9.23242e+06	9.3873e+06	1.19975e+07	1.35864e+07
Putative 2-component sensor protein	Q1R9U8	yehU	8.46	62.6	2.2269e+06	6.04151e+06	5.93527e+06	4.50769e+06	3.76996e+06	1.69043e+06
Glutathione-regulated potassium-efflux system protein KefC	Q1RGF1	kefC	5.99	67.7	2.34957e+06	5.68286e+06	9.09488e+06	4.73884e+06	3.39777e+06	3.52462e+06
Aldehyde dehydrogenase A	Q1RBZ9	aldA	5.15	52.3	3.16537e+07	3.35168e+07	3.72745e+07	6.3907e+07	2.25342e+07	3.98524e+07
Putative phosphatase	Q1REG4	ybhA	5.9	30.2	171510	711444	0	345434	0	126001
Putative protease YdcP	Q1RBY2	ydcP	7.52	74.2	1.55887e+06	1.90532e+06	996579	3.13412e+06	1.576e+06	603806
Putative NAGC-like transcriptional regulator	Q1RBK5	mlc	6.23	44.3	2.7827e+06	6.10219e+06	9.37269e+06	5.60056e+06	5.54561e+06	5.64486e+06
DNA helicase	Q1R4C1	uvrD	6.24	83.9	6.25184e+07	1.13403e+08	1.66528e+08	1.25526e+08	1.03057e+08	7.96432e+07
Thiol:disulfide interchange protein DsbD	Q1R3C4	dipZ	6.79	61.9	2.77707e+06	5.09533e+06	6.17023e+06	5.56401e+06	5.62174e+06	2.51221e+06
Fatty acid oxidation complex subunit alpha	Q1R466	fadB	6.39	79.5	2.07227e+07	1.80707e+07	3.0643e+07	4.13954e+07	2.43375e+07	3.24955e+07
Integration host factor subunit alpha	Q1RB83	ihfA; AL524_RS16385	9.35	11.3	0	0	0	0	8.93106e+06	3.45585e+06
Uncharacterized protein	Q1R853	UTI89_C3005	4.86	18.9	0	295769	0	0	404285	540325
Uncharacterized protein	Q1R2N9	UTI89_C4972	7.99	19.4	0	0	0	0	0	551147
Cell division coordinator CpoB	Q1REI2	ybgF	8.19	28.2	0	945612	0	0	404646	401749
Cytoplasmic alpha-amylase	Q1RAL3	amyA	4.65	56.6	0	142348	0	0	0	9.93974e+06
Acidic protein MsyB	Q1RDA6	msyB	3.73	14.4	0	0	783879	0	687543	379676
Uncharacterized protein	Q1RAY4	UTI89_C2004	5.53	14.4	0	0	646281	0	656695	384665
Uncharacterized protein	Q1RAR5	yecN	9.29	16.2	0	0	0	0	735473	0
PanD regulatory factor	Q1R5G8	yhhK	8.18	14.6	0	0	0	0	825236	0
D-erythro-7,8-dihydroneopterin triphosphate epimerase	Q1R9B0	folX	7.06	14.1	0	0	0	0	419860	0
Hypothetical symporter YdjN	Q1RB65	ydjN	9.19	48.7	0	0	879925	0	346787	0
Glutathione-regulated potassium-efflux system protein KefB	Q1R5T2	kefB	6.73	66.4	0	0	164601	0	113963	77098
Class B acid phosphatase	Q1R3L5	aphA	7.43	26.1	0	0	1.10392e+06	0	699585	917265
Nitrogen regulatory protein P-II	Q1R8I2	glnB; CFNIH1_RS23780	5.34	12.4	0	0	0	0	264427	0
Putative purine regulated protein YdiK	Q1RBA8	ydiK	8.31	39.8	0	102649	181489	0	0	0
Uncharacterized protein	Q1R5F2	yhhN	9.28	23.8	0	0	361054	0	0	0
UPF0266 membrane protein YobD	Q1RAX0	yobD	10.07	17.6	0	214053	271299	0	78689.6	120309
Uncharacterized protein	Q1RDV2	ycaP	5.99	26.2	0	654132	0	0	1.04888e+06	0
Uncharacterized protein	Q1R8Q4	ypfH	5.06	25.6	0	546664	0	0	0	0
Tryptophan-specific transport protein	Q1R6I0	mtr	9.38	44.4	0	79610.4	58601.6	0	0	0
Amino acid transporter protein YjdE	Q1R3E7	yjdE	8.92	46.8	0	0	96733.9	0	0	135535
Spermidine/putrescine transport system permease	Q1RD30	potC	9.67	29.1	0	105307	117899	0	0	0
Histidine-binding periplasmic protein of high-affinity histidine transport system	Q1R9A4	hisJ	5.6	28.5	0	1.52094e+06	0	0	0	0
Methyl-accepting chemotaxis protein II	Q1RAP9	tar	5.78	60.7	0	307800	142664	0	0	0
Hypothetical type II secretion protein GspE	Q1R733	gspE	6	55.1	0	0	55212.6	0	0	0
Sec-independent protein translocase protein TatC	Q1R472	tatC	5.35	28.9	0	96724.6	168366	0	0	0
Peptide transport system permease protein SapB	Q1RC66	sapB	9.17	36	0	237614	425241	0	0	0
Undecaprenyl-diphosphatase	Q1R6S4		8.31	29.8	0	779301	1.12329e+06	0	965729	928867
Uncharacterized protein	Q1RC78	yciR	6.93	74.7	0	222020	481980	0	324385	0
30S ribosomal protein S13	Q1R633	rpsM	10.78	13.1	5.53059e+07	8.18917e+07	6.34451e+07	1.09974e+08	1.78358e+08	1.67326e+08
Dipeptide and tripeptide permease B	Q1R5C0	yhiP	8.46	53.5	8.11522e+07	1.67766e+08	2.32273e+08	1.61248e+08	1.64268e+08	1.64317e+08
Protein ApaG	Q1RGE7	apaG	4.75	13.9	2.17939e+06	2.25827e+06	1.43111e+06	4.32576e+06	1.45694e+06	1.19674e+06
Enterobactin synthetase component E	Q1REW8	entE	5.63	59	1.37459e+07	1.50389e+07	1.1016e+07	2.7198e+07	9.09031e+06	2.92845e+06
Cardiolipin synthase A	Q1RCI7	cls	8.29	54.8	3.16234e+07	4.76102e+07	6.58887e+07	6.26959e+07	4.41534e+07	4.08937e+07
Putative outer membrane receptor for iron compound or colicin	Q1RAB2	UTI89_C2234	5.63	79.1	6.32491e+07	9.46515e+07	1.22797e+08	1.24442e+08	1.2959e+08	7.02308e+07
Outer membrane hemin receptor ChuA	Q1R5A7	chuA	5.34	72.4	1.68427e+08	2.28409e+08	2.67885e+08	3.31146e+08	3.34157e+08	1.90734e+08
Putative ABC-type transport protein YbhF	Q1RED3	ybhF	5.53	63.7	1.7949e+07	1.78882e+07	2.39104e+07	3.51758e+07	2.83368e+07	1.33871e+07
CDP-diacylglycerol--serine O-phosphatidyltransferase (Phophatidylserine synthase)	Q1R8E6	pssA	8.98	52.9	1.75784e+07	3.39907e+07	2.95441e+07	3.45385e+07	1.96962e+07	1.07026e+07
Sensor histidine kinase RcsC	Q1R9J7	rcsC	6.25	106.5	6.26067e+06	7.39857e+06	7.60252e+06	1.22368e+07	7.62873e+06	1.57959e+07
Exopolyphosphatase	Q1R8N6	ppx	7.14	58.1	1.15142e+07	2.04108e+07	1.44419e+07	2.24822e+07	1.05234e+07	5.62666e+06
UPF0114 protein YqhA	Q1R6Z4	yqhA	7.05	19.8	1.39213e+06	776929	1.54505e+06	2.69566e+06	7.80006e+06	3.32357e+06
Cytotoxic necrotizing factor 1	Q1R2U0	cnf1	5.38	113.8	1.09543e+06	896237	128823	2.11987e+06	666143	217416
Uncharacterized protein	Q1RF79	ylaB	6.38	58.9	3.53174e+06	6.60068e+06	1.11852e+07	6.8413e+06	8.17097e+06	4.67312e+06
Hypothetical transport protein YajR	Q1RFB3	yajR	9.38	56.7	275702	489504	1.1336e+06	535508	580587	256174
Enterobactin synthetase component F	Q1REX6	entF	5.24	141.8	2.73339e+07	3.35405e+07	2.47369e+07	5.30225e+07	2.36804e+07	1.08454e+07
Arginine N-succinyltransferase	Q1RB46	astA	6.73	38.5	2.26005e+07	1.95942e+07	3.66359e+07	4.37451e+07	2.58703e+07	2.24427e+07
Signal recognition particle receptor FtsY	Q1R5F6	ftsY	4.53	54.6	1.67577e+07	2.23207e+07	1.76097e+07	3.25839e+07	1.75014e+07	1.23123e+07
Ferrienterobactin receptor	Q1REY0	fepA	5.45	82	1.06149e+08	1.19232e+08	1.51834e+08	2.0545e+08	1.7775e+08	9.24003e+07
Putative autotransporter	Q1RDE2	UTI89_C1139	5.63	97.1	1.51373e+08	1.60579e+08	2.30885e+08	2.91634e+08	2.45611e+08	4.14055e+09
Uncharacterized protein	Q1R694	yhdP	5.62	138.9	1.23049e+07	1.26353e+07	1.61231e+07	2.37891e+07	1.67835e+07	1.26192e+07
Uncharacterized protein	Q1R3K9	yjcC	8.54	61	1.72653e+06	4.71738e+06	6.96167e+06	3.32765e+06	2.54496e+06	2.7007e+06
HMWP1 nonribosomal peptide/polyketide synthase	Q1RAF9	irp1	5.73	348.6	2.76537e+08	2.50269e+08	2.73145e+08	5.32495e+08	3.08866e+08	1.8152e+08
Uncharacterized protein	Q1R579	yhjG	8.73	75	1.32733e+08	1.2583e+08	1.94216e+08	2.54891e+08	1.98117e+08	1.04532e+08
Uncharacterized protein	Q1R8B3	yfjD	6.02	47.1	2.53561e+06	2.10049e+06	4.20256e+06	4.88043e+06	3.48806e+06	1.63445e+06
Aminoacyl-histidine dipeptidase (Peptidase D)	Q1RFT4	pepD	5.33	52.9	2.45171e+07	2.95047e+07	2.83383e+07	4.71089e+07	2.32129e+07	9.14032e+06
Uncharacterized protein	Q1R829	ygaM	8.02	12.3	4.0508e+08	5.23486e+08	5.21723e+08	7.73335e+08	1.28579e+09	8.4991e+08
Uncharacterized protein	Q1RB06	yeaJ	7.2	63.2	3.58898e+06	4.65375e+06	9.86208e+06	6.84199e+06	5.7338e+06	2.67555e+06
Putative aminotransferase	Q1R8Y7	UTI89_C2711	7.87	46.2	1.29221e+07	1.47285e+07	1.33407e+07	2.46808e+07	7.4733e+06	7.6615e+06
Succinylglutamate desuccinylase	Q1RB49	ydjS	6.52	35.8	4.67779e+06	3.41037e+06	1.76601e+06	8.91165e+06	5.79753e+06	1.35609e+06
Alpha-galactosidase monomer, subunit of alpha-galactosidase	Q1R3E3	melA	5.83	50.6	2.80774e+06	5.06856e+06	2.19467e+06	5.37359e+06	1.48962e+06	332428
Uncharacterized protein	Q1RBI4	ydgA	5.22	54.6	3.70902e+08	4.91732e+08	8.3419e+08	7.0556e+08	6.30119e+08	4.76416e+08
Anaerobic ribonucleoside-triphosphate reductase-activating protein	Q1R319	nrdG	7.39	17.4	314193	783594	0	597262	202885	0
Putative sulfatase	Q1R9N0	yejM	9.13	67.3	1.12866e+07	1.4472e+07	1.60322e+07	2.14518e+07	1.72224e+07	8.1589e+06
Respiratory nitrate reductase 2 alpha chain	Q1RBV0	narZ	7.01	144.7	2.86309e+07	3.12832e+07	5.42268e+07	5.44453e+07	4.84769e+07	2.87738e+07
4-aminobutyrate aminotransferase	Q1R841	gabT	6.4	45.9	2.47563e+06	3.17501e+06	6.05898e+06	4.68332e+06	6.72817e+06	2.97348e+06
DNA recombination protein RmuC	Q1R478	rmuC	5.47	54.7	7.58425e+06	8.16935e+06	1.10528e+07	1.43383e+07	9.65898e+06	2.184e+06
ATP synthase subunit beta	Q1R4K2	atpD	5.01	50.3	1.55559e+09	2.0216e+09	2.88902e+09	2.94318e+09	2.60561e+09	1.83891e+09
Putative outer membrane colicin Js receptor	Q1R209	cjrC	5.72	82.7	2.27917e+07	3.19758e+07	3.4244e+07	4.27771e+07	4.05627e+07	1.88482e+07
Low affinity tryptophan permease	Q1R4M5	tnaB	9	45.2	751268	2.03838e+06	2.39562e+06	1.413e+06	1.18469e+06	2.25477e+06
DNA-directed DNA polymerase	Q1RG05	dnaE	5.31	129.8	2.0849e+06	2.26266e+06	1544125	3.92462e+06	1.44734e+06	975451
Protein translocase subunit SecA	Q1RG97	secA	5.6	101.9	1.68265e+08	1.78743e+08	1.36741e+08	3.15761e+08	1.62354e+08	9.08579e+07
N-succinylarginine dihydrolase	Q1RB48	astB	6.37	49.5	5.58197e+06	7.73834e+06	2.51523e+06	1.0438e+07	4.09911e+06	1.01087e+06
NADH dehydrogenase I chain L	Q1R9D9	nuoL	8.24	66.4	9.79927e+06	1.51049e+07	2.71495e+07	1.8292e+07	1.86269e+07	1.74437e+07
Uncharacterized protein	Q1RAV3	yebT	6.29	96.5	1.92835e+07	3.55881e+07	2.25735e+07	3.59172e+07	2.01616e+07	1.26104e+07
Glutathione import ATP-binding protein GsiA	Q1RE96		7.17	69.1	3.47735e+06	3.56543e+06	4.79864e+06	6.45933e+06	4.08503e+06	455133
Transketolase	Q1R8R5	tktB	6.47	75.6	3.78342e+07	4.39456e+07	4.75441e+07	7.05243e+07	5.35122e+07	2.6936e+07
ATP-dependent RNA helicase RhlB	Q1R4F9	rhlB	7.68	47.1	6.50002e+07	8.94604e+07	7.24471e+07	1.20876e+08	7.30604e+07	4.81059e+07
Paraquat-inducible protein A	Q1RDR4	pqiA	7.85	46.4	853305	234587	1.72434e+06	1.57513e+06	926335	804100
Uncharacterized protein	Q1R3K5	yjcD	6.92	45.7	3.11817e+06	3.81209e+06	5.95092e+06	5.75338e+06	3.23924e+06	3.09823e+06
Glycerol kinase	Q1R3Z2	glpK	6.34	60.2	2.95381e+08	1.0196e+09	5.25071e+08	5.45777e+08	2.57809e+08	2.66011e+08
Dihydrolipoyl dehydrogenase	Q1RG75	lpdA	6.44	53.1	6.43542e+08	9.20489e+08	1.06274e+09	1.19039e+09	7.92809e+08	8.61863e+08
Uncharacterized protein	Q1R8I1	yfhA	6.77	50.7	3.0842e+06	3.07962e+06	2.47429e+06	5.71302e+06	3.13216e+06	2.16618e+06
Autonomous glycyl radical cofactor	Q1R8F3	yfiD	5.85	15	2.30224e+07	2.88806e+07	6.02129e+06	4.23527e+07	3.46133e+07	1.56412e+07
Uncharacterized protein	Q1RDQ2	yccF	9.63	16.3	2.93863e+06	3.60732e+06	5.25325e+06	5.40943e+06	9.7748e+06	4.48304e+06
Peptidoglycan D,D-transpeptidase FtsI	Q1RGB1	ftsI	9.64	63.9	5.74758e+06	6.55894e+06	8.39424e+06	1.0555e+07	1.01739e+07	3.09624e+06
Lactaldehyde reductase	Q1R7P2	fucO	5.21	40.7	1.19933e+06	1.00404e+06	1.88193e+06	2.20273e+06	909103	568307
Penicillin-binding protein 1B	Q1RG40	mrcB	9.07	94.2	8.55333e+07	9.73111e+07	1.22956e+08	1.57275e+08	1.10664e+08	9.17632e+07
Ribosomal RNA large subunit methyltransferase K/L	Q1RDR6	rlmL	8.75	78.8	2.26506e+07	2.22884e+07	1.65235e+07	4.14438e+07	1.94691e+07	1.464e+09
50S ribosomal protein L11	Q1R5U7	rplK	9.63	14.9	1.08068e+08	1.68714e+08	1.05913e+08	1.9786e+08	3.18398e+08	2.44174e+08
Uncharacterized protein	Q1R4T6	yicH	5.96	63.2	3.04463e+07	3.27881e+07	5.49731e+07	5.57512e+07	4.44214e+07	3.03096e+07
Hypothetical zinc-type alcohol dehydrogenase-like protein yahK	Q1RFK4	yahK	6.29	38	1.39216e+06	4.53189e+06	4.2748e+06	2.55064e+06	4.99016e+06	3.67915e+06
Putative transmembrane protein	Q1RAX6	yoaE	5.02	56.5	2.1464e+06	2.85294e+06	3.77367e+06	3.92715e+06	1.76898e+06	1.10211e+06
Probable tonB-dependent receptor YncD	Q1RBW6	yncD	5.44	77.2	7.07065e+06	1.11772e+07	1.63354e+07	1.29162e+07	1.23508e+07	9.4346e+06
Periplasmic dipeptide transport protein	Q1R553	dppA	6.81	60.3	2.6679e+06	2.99533e+06	8.60565e+06	4.88704e+06	4.8524e+06	4.01286e+06
Tryptophan synthase beta chain	Q1RCA6	trpB	6.2	43	4.01511e+06	5.29752e+06	4.34003e+06	7.34684e+06	4.8187e+06	2.58972e+06
[NADP+] succinate-semialdehyde dehydrogenase	Q1R842	gabD	6.04	51.8	9.08055e+07	9.36545e+07	8.03374e+07	1.65921e+08	8.5515e+07	5.65618e+07
DNA helicase	Q1RDQ1	helD	8.62	81.5	1.11602e+07	1.55495e+07	9.69004e+06	2.02917e+07	1.22528e+07	5.3025e+06
Peptidoglycan D,D-transpeptidase MrdA	Q1RES7	mrdA	8.82	70.8	7.59413e+06	8.51444e+06	1.1364e+07	1.37994e+07	1.48126e+07	5.35616e+06
UPF0061 protein YdiU	Q1RB89	ydiU	5.77	54.6	1.2337e+06	522572	377150	2.23736e+06	604008	62759.3
Alkyl hydroperoxide reductase, F52a subunit detoxification of hydroperoxides	Q1REV5	ahpF	5.69	57.4	2.98476e+06	5.07857e+06	4.26194e+06	5.41361e+06	3.46163e+06	1.42626e+06
Nuclease SbcCD subunit C	Q1RFE6	sbcC	5.88	118.5	3.08412e+06	4.37587e+06	3.01734e+06	5.57858e+06	2.2661e+06	1.55803e+06
Soluble pyridine nucleotide transhydrogenase	Q1R3U7	sthA	6.57	51.5	7.77609e+07	8.09284e+07	1.19862e+08	1.40946e+08	8.3044e+07	4.38178e+07
Macrolide export ATP-binding/permease protein MacB	Q1RE44	ybjZ	6.34	70.6	5.13069e+06	4.71251e+06	6.9383e+06	9.21493e+06	8.69003e+06	3.4789e+06
ATP synthase subunit alpha	Q1R4K0	atpA	6.13	55.2	1.60888e+09	2.02263e+09	3.45379e+09	2.89272e+09	3.09734e+09	1.92682e+09
Respiratory nitrate reductase 1 beta chain	Q1RCL0	narH	6.77	58	1.5398e+08	1.81445e+08	2.82075e+08	2.76599e+08	2.3608e+08	1.45198e+08
Quinone-dependent D-lactate dehydrogenase	Q1R9T9	dld	7.03	66.2	6.6545e+07	9.03005e+07	1.39757e+08	1.1977e+08	1.29221e+08	8.18753e+07
DNA ligase	Q1R8W1	ligA	5.44	73.6	2.43806e+07	1.97734e+07	1.35401e+07	4.38408e+07	1.63329e+07	5.89469e+06
Putative iron transport protein, periplasmic-binding protein SitA	Q1RCU3	sitA	8.44	33.4	648592	408420	2.14164e+06	1.16406e+06	2.3217e+06	1.96128e+06
Paraquat-inducible protein B	Q1RDR3	pqiB	8.54	62.7	7.67917e+07	9.83512e+07	1.58652e+08	1.37193e+08	1.26909e+08	7.37527e+07
Uncharacterized protein	Q1R956	hkcB	5.57	12.2	308826	0	258979	550935	1.82712e+06	440102
Uncharacterized protein	Q1R4X8	yibP	9.98	47.4	5.46509e+06	7.78287e+06	9.85033e+06	9.72651e+06	1.06562e+07	5.25734e+06
NADH-quinone oxidoreductase	Q1R9D4	nuoG	6.25	100.4	2.50984e+08	3.34805e+08	4.71361e+08	4.46621e+08	4.5809e+08	3.21168e+08
Ribonucleoside-diphosphate reductase 1 beta chain	Q1R9I1	nrdB	4.81	43.5	3.5135e+07	3.08616e+07	3.01816e+07	6.25351e+07	3.30658e+07	1.49507e+07
Protease III	Q1R7J3	ptrA	6.24	107.9	2.15872e+06	1.57314e+06	1.16559e+06	3.82005e+06	767713	0
Uncharacterized protein	Q1R3E8	yjdB	6.86	63.3	6.7611e+06	1.2248e+07	1.99429e+07	1.19785e+07	1.04194e+07	6.6842e+06
Bifunctional chorismate mutase/prephenate dehydratase	Q1R8C6	pheA	6.68	43	9.99258e+06	1.27886e+07	1.00335e+07	1.7636e+07	9.7831e+06	5.3291e+06
Aldehyde dehydrogenase B (Lactaldehyde dehydrogenase)	Q1R507	aldB	5.63	59.6	2.44851e+08	3.20725e+08	2.73178e+08	4.30933e+08	2.2755e+08	1.32855e+08
NADH dehydrogenase	Q1RD45	ndh	9.06	48.3	4.17772e+07	5.68649e+07	7.8899e+07	7.37206e+07	8.45801e+07	6.07816e+07
Lipopolysaccharide assembly protein A	Q1RC86	yciS	9.63	11.3	6.77097e+06	8.59197e+06	8.49927e+06	1.18413e+07	1.64381e+07	1.4265e+07
Uncharacterized protein	Q1RBA9	ydiJ	7.49	113.3	3.58361e+07	4.3879e+07	6.61216e+07	6.28542e+07	5.3986e+07	7.47962e+07
Ketol-acid reductoisomerase (NADP(+))	Q1R4G3		5.31	54	4.22322e+07	3.8197e+07	2.98261e+07	7.39297e+07	3.35512e+07	1.1677e+07
CadA, subunit of lysine decarboxylase	Q1R3C8	cadA	6.34	81.4	5.28939e+07	7.26285e+07	7.3684e+07	9.26027e+07	7.23465e+07	5.18217e+07
Aminopeptidase N	Q1RDS5	pepN	5.29	98.9	1.85853e+08	2.19271e+08	1.29627e+08	3.24334e+08	1.35603e+08	6.52158e+07
NADH-quinone oxidoreductase subunit K	Q1R9D8	nuoK; AL524_RS10830	8.84	10.8	4.79621e+06	5.07936e+06	7555893	8.37242e+06	5.50917e+06	4.2703e+06
Pseudouridine synthase	Q1R8D1	rluD	6.81	37.1	1.87485e+07	2.5646e+07	1.7753e+07	3.25495e+07	1.41518e+07	9.88819e+06
Cell division protein FtsA	Q1RGA1	ftsA	6.24	45.3	4.26964e+07	4.3838e+07	4.45214e+07	7.42213e+07	4.61494e+07	3.04413e+07
Hypothetical ABC transporter ATP-binding protein yejF	Q1R9N9	yejF	9.06	58.6	4.60808e+06	8.44302e+06	1.38168e+07	8.00704e+06	7.65789e+06	6.47658e+06
Dipeptide transport ATP-binding protein DppF	Q1R557	dppF	8.85	37.5	1.66726e+06	2.72754e+06	4.29407e+06	2.88696e+06	4.08317e+06	3.37862e+06
Replicative DNA helicase	Q1R3N1	dnaB	5.06	53.8	7.35119e+06	9.65995e+06	8.91777e+06	1.26947e+07	7.75657e+06	5.87581e+06
ATP synthase subunit c	Q1R4J5	atpE; APT61_RS22225; GLAD_RS10935; ENT638_RS21315	4.61	8.3	3.81698e+06	9.61159e+06	13543614	6.61568e+06	8.45084e+06	2.05352e+07
Cytosine-specific methyltransferase	Q1RAH9	dcm	8.53	53.5	1.15773e+06	1.0513e+06	519406	1.99247e+06	643220	257052
DNA mismatch repair protein MutL	Q1R390	mutL	6.68	68	2.46973e+07	1.82184e+07	1.33729e+07	4.24462e+07	1.92127e+07	6.21134e+06
Uncharacterized protein	Q1R6T3	yqiC	6.16	13.9	8.81626e+06	7.42387e+06	6.19545e+06	1.50374e+07	1.68498e+07	1.11535e+07
DNA repair protein RadA	Q1R254	radA	7.72	51.1	1.1812e+07	1.4401e+07	9.13566e+06	2.02069e+07	1.09392e+07	7.97113e+06
GTP pyrophosphokinase	Q1R7Q8	relA	6.77	83.8	2.37864e+07	2.86998e+07	2.1387e+07	4.07483e+07	2.15892e+07	1.16712e+07
NADH-quinone oxidoreductase subunit C/D	Q1R9D1	nuoC	6.42	68.7	5.98667e+08	6.71828e+08	9.35464e+08	1.01686e+09	8.51742e+08	7.11677e+08
Acriflavine resistance protein A	Q1RC73	UTI89_C1563	5.69	41.1	547412	0	0	926269	867063	188817
Uncharacterized protein	Q1R5M7	yhgF	6.14	85.1	3.22964e+07	2.68148e+07	1.64412e+07	5.44673e+07	1.96872e+07	6.21698e+06
Hypoxanthine phosphoribosyltransferase	Q1RG66	hpt	5.22	21.7	1.02599e+06	1.34593e+06	708985	1.73114e+06	1.17209e+06	1.04935e+06
SitB protein	Q1RCU4	sitB	8.16	30.1	249306	0	198138	419338	265482	0
Uncharacterized protein	Q1R898	UTI89_C2960	6.51	72.7	1.03346e+07	9.92103e+06	7.57384e+06	1.73791e+07	8.26842e+06	3.06657e+06
Putative pesticin receptor	Q1RAF5	fyuA	5.73	73.6	2.23761e+08	2.70473e+08	3.39998e+08	3.76495e+08	4.20942e+08	2.51999e+08
Penicillin-binding protein 1A	Q1R5P1	mrcA	6.51	94.5	3.3355e+07	4.44174e+07	29969013	5.6e+07	3.57662e+07	1.67826e+07
Glutamine synthetase	Q1R443	glnA	5.47	51.9	6.3568e+07	6.99564e+07	8.13712e+07	1.07109e+08	1.13281e+08	5.98727e+07
Efflux pump membrane transporter	Q1R8Q8	acrD	5.96	113	1.1264e+06	897290	1.70535e+06	1.88728e+06	1.16447e+06	2.40858e+06
Putative membrane protein	Q1R225	UTI89_P013	5.05	46.2	2.37478e+07	3.08442e+07	3.91627e+07	3.97458e+07	2.35279e+07	2.49173e+07
ATP-dependent RNA helicase SrmB	Q1R8F6	UTI89_C2898	9.25	49.9	7.42121e+07	1.01719e+08	9.19792e+07	1.23692e+08	8.6032e+07	5.40499e+07
AsmA suppressor of OmpF assembly mutants	Q1RA06	asmA	5.62	69	2.88436e+07	2.93165e+07	3.34795e+07	4.79945e+07	3.72862e+07	1.74902e+07
Peptidyl-prolyl cis-trans isomerase	Q1R344	fklB	5.21	28.2	1.31746e+07	1.91193e+07	6.16281e+06	2.19355e+07	6.16481e+06	6.67796e+06
FdnG, alpha subunit of formate dehydrogenase-N	Q1RBU7	fdnG	7.09	112.8	6.95596e+07	8.82853e+07	8.85917e+07	1.1574e+08	8.80836e+07	6.86498e+07
Uncharacterized protein	Q1RC12	ydbH	5.91	96.6	4.81049e+06	6.21712e+06	8.60511e+06	7.91836e+06	6.25469e+06	5.13417e+06
Uncharacterized protein	Q1RF82	ybaY	8.15	19.4	6.22913e+08	9.14917e+08	1.19938e+09	1.03075e+09	1.22293e+09	1.26744e+09
Apolipoprotein N-acyltransferase	Q1REQ9	lnt	9.48	57.2	1.45299e+07	1.73297e+07	1.75384e+07	2.40151e+07	1.70715e+07	1.11931e+07
Putative membrane transport protein	Q1RC70	UTI89_C1566	9.29	41.3	164656	237570	346584	272092	0	312560
L-serine dehydratase (Deaminase), L-SD2	Q1R7P4	sdaB	5.8	48.7	66778.5	122548	62702	110038	0	0
Bifunctional protein Aas	Q1R7H5	aas	9.22	80.8	2.14771e+07	3.21405e+07	3.28265e+07	3.54399e+07	1.67898e+07	9.15021e+06
Multidrug resistance protein MdtA	Q1R9Z7	yegM	8.6	50.2	1.00654e+07	1.07014e+07	1.1217e+07	1.66183e+07	1.80429e+07	1.24557e+07
Uncharacterized protein	Q1RAT9	yebE	5.5	23.8	8.98017e+06	3.50582e+06	8.89141e+06	1.47195e+07	1.07518e+07	1.04651e+07
Uncharacterized protein	Q1RC76	yciW	6.68	44.9	1.01907e+06	4.45554e+06	4.71087e+06	1.6688e+06	680918	1.36466e+06
Cell division protein ZipA	Q1R8W0		6.01	36.9	1.67465e+07	2.4821e+07	3.29901e+08	2.74548e+07	2.69112e+07	3.1583e+08
ATP-dependent helicase HrpB	Q1RG42	hrpB	6.77	91	1.43885e+06	1.15231e+06	1.00497e+06	2.36368e+06	1.31518e+06	380117
Polysialic acid transport protein KpsD	Q1R753	kpsD	7.5	60.5	5.93355e+07	9.31472e+07	1.3923e+08	9.72394e+07	8.74737e+07	7.11564e+07
Transcriptional regulator NadR	Q1R253	nadR	5.47	48.1	1.13137e+07	1.2031e+07	7.35028e+06	1.85999e+07	8.84677e+06	7.41384e+06
Periplasmic oligopeptide-binding protein	Q1RCJ3	oppA	6.43	63.5	8.51764e+06	1.56995e+07	2.53578e+07	1.39508e+07	1.60073e+07	1.37764e+07
Outer membrane protein assembly factor BamA	Q1RG12	ecfK	5.12	90.5	6.41811e+08	7.22497e+08	8.90519e+08	1.04845e+09	9.73698e+08	7.16739e+08
PnuC NMN transporter	Q1REI0	pnuC	7.24	27	1.04569e+06	2.11422e+06	3.06829e+06	1.70027e+06	2.12439e+06	1.87335e+06
Protein-export membrane protein SecG	Q1R6G3	secG	9.32	13.1	1.35874e+07	1.3468e+07	1.22226e+07	2.21289e+07	2.43577e+07	2.05438e+07
Glycogen synthase	Q1R5J7	glgA	6.62	52.8	1.29563e+08	1.85688e+08	3.37918e+08	2.10741e+08	2.10861e+08	1.8022e+08
GMP synthase [glutamine-hydrolyzing]	Q1R8M9	guaA	5.39	58.6	8.41379e+07	1.17693e+08	6.59407e+07	1.36737e+08	5.50331e+07	3.46969e+07
PmbA protease involved in Microcin B17 maturation and sensitivity to the DNA gyrase inhibitor LetD	Q1R321	pmbA	5.5	48.3	2.87593e+07	2.92995e+07	2.32367e+07	4.66578e+07	2.38023e+07	1.20077e+07
Uncharacterized protein	Q1R574	yhjK	6.16	74.4	6.48695e+06	6.9836e+06	9.42695e+06	1.05288e+07	9.34504e+06	4.25445e+06
Peptide transport system permease protein SapC	Q1RC67	sapC	5.34	31.5	937717	1.132e+06	947041	1.51561e+06	1.44011e+06	562680
30S ribosomal protein S11	Q1R635	rpsK; AL524_RS00775	11.33	13.8	5.34375e+07	7.57092e+07	6.16292e+07	8.63538e+07	1.17372e+08	9.68088e+07
UDP-forming cellulose synthase catalytic subunit	Q1R570	bcsA	9.52	101.6	971625	2.25499e+06	1.62064e+06	1.57363e+06	910933	136679
Protein YhjJ	Q1R576	yhjJ	6.24	55.5	3.57126e+07	3.58811e+07	3.14709e+07	5.7561e+07	2.44366e+07	1.44718e+07
Phenylalanine-specific permease	Q1REY8	pheP	9.55	51.9	103393	156215	122870	166084	0	0
Inosine-5'-monophosphate dehydrogenase	Q1R8M8	guaB	6.42	54.6	5.04624e+07	6.84402e+07	9.63835e+07	8.11193e+07	8.38468e+07	6.33451e+07
Succinate dehydrogenase hydrophobic membrane anchor subunit	Q1REK3	sdhD	8.51	12.9	1.83103e+07	2.30174e+07	3.24976e+07	2.95544e+07	3.77961e+07	3.65118e+07
Succinate dehydrogenase flavoprotein subunit	Q1REK2	sdhA	6.27	64.8	1.2346e+09	1.10824e+09	1.39569e+09	1.99268e+09	1.89111e+09	9.59456e+08
USG-1 protein	Q1R993	usg	4.48	36.3	1.92311e+07	3.35026e+07	1.83964e+07	3.07815e+07	8.92968e+06	3.96658e+08
Glutathione S-transferase	Q1RBG0	gst	6.55	22.8	114422	129233	0	183471	0	212759
Probable diguanylate cyclase DgcQ	Q1RAI4	UTI89_C2157	7.74	64.7	7.06098e+06	9.76153e+06	1.70108e+07	1.13059e+07	1.41964e+07	9.19346e+06
Multifunctional fusion protein	Q1R393	yjeF	6.24	55.4	2.22646e+07	2.31793e+07	2.03623e+07	3.55501e+07	1.78773e+07	6.7741e+06
Uncharacterized protein	Q1RE48	ybjD	9.26	63.5	9.18584e+06	1.27528e+07	1.6207e+07	1.47265e+07	2.06628e+07	1.15696e+07
Maltoporin	Q1R3Q0	lamB	5.02	49.9	3.61691e+08	4.34151e+08	8.46097e+08	5.78202e+08	3.99783e+08	4.59451e+08
Methionine--tRNA ligase	Q1R9V8		6.02	76.2	4.0632e+07	4.41298e+07	3.55052e+07	6.49387e+07	3.62809e+07	1.81484e+07
RecBCD enzyme subunit RecD	Q1R7J5	recD	7.01	66.7	4.30171e+06	6.57396e+06	5.95364e+06	6.88315e+06	4.8167e+06	1.56935e+06
Acylneuraminate cytidylyltransferase	Q1R746	neuA	6.42	48.6	8.07642e+07	1.19653e+08	7.39799e+07	1.28995e+08	6.11291e+07	5.81554e+07
Phosphoenolpyruvate synthase	Q1RB93	ppsA	5.06	87.4	3.93652e+08	3.90919e+08	3.12134e+08	6.31789e+08	2.98089e+08	1.54942e+08
4-alpha-glucanotransferase	Q1R5L8	malQ	6.51	78.6	7.3146e+06	7.94309e+06	5.48453e+06	1.1693e+07	5.07995e+06	5.25245e+06
3-hydroxyacyl-[acyl-carrier-protein] dehydratase FabZ	Q1RG09	fabZ	8.32	20.8	3.06354e+07	3.32035e+07	1.06403e+08	4.86698e+07	2.19025e+08	2.35848e+08
Acyl carrier protein	Q1RD62	acpP; LG71_RS18505; AL524_RS17030; AB182_RS09560	4.06	8.6	3.87967e+06	3.27052e+06	1.19938e+07	6.16758e+06	6.98725e+06	6.26493e+06
Uncharacterized protein	Q1R2S5	UTI89_C4936	6.4	62.4	7.66215e+06	1.21104e+07	6.26161e+06	1.21981e+07	6.55388e+06	1.67118e+06
Protease II	Q1RAU1	ptrB	5.97	79.4	6.68156e+06	6.08004e+06	3.42347e+06	1.06312e+07	3.67009e+06	246589
Trk system potassium uptake protein TrkA	Q1R643	trkA	5.95	50.3	1.55159e+07	2.55427e+07	3.41558e+07	2.46846e+07	1.82805e+07	1.68311e+07
Ribose import ATP-binding protein RbsA	Q1R4I3	rbsA	6.32	55	2.82331e+06	3.83406e+06	3.98089e+06	4.49664e+06	3.89872e+06	1.41945e+06
L-serine dehydratase 1	Q1RAX8	sdaA	5.34	48.9	4.23352e+07	4.58845e+07	3.32778e+07	6.7146e+07	3.0316e+07	1.62199e+07
Uncharacterized protein	Q1RE92	yliE	5.94	90	708588	0	631691	1.11695e+06	888771	336763
Outer membrane protein X	Q1REB0	ompX	7.17	18.8	3.71004e+09	3.98902e+09	6.05116e+09	5.87872e+09	8.8118e+09	8.60811e+09
Blue copper oxidase CueO	Q1RG68	cueO	6.95	58.2	666673	1.16501e+06	2.17354e+06	1.05458e+06	1.79072e+06	480669
Lead, cadmium, zinc and mercury transporting ATPase	Q1R5F1	zntA	5.83	76.8	5.58844e+07	7.3454e+07	6.27618e+07	8.83536e+07	6.0264e+07	3.52416e+07
tRNA (guanosine(18)-2'-O)-methyltransferase	Q1R4U0	spoU	7.23	25.3	1.68808e+06	1.22767e+06	509033	2.668e+06	613462	623497
Ribosomal RNA large subunit methyltransferase I	Q1RDP5	yccW	7.74	44.4	685021	504577	1.0058e+06	1.07914e+06	989458	1.23297e+06
Chromosome partition protein MukF	Q1RDT5	mukF	4.89	50.6	7.30397e+06	7.13995e+06	2.68178e+06	1.15571e+07	4.82214e+06	2.68861e+06
NAD/NADP-dependent betaine aldehyde dehydrogenase	Q1RFM2	betB	5.19	53	7.92316e+07	6.59112e+07	5.47606e+07	1.25408e+08	5.41297e+07	2.24739e+07
Thymidine kinase	Q1RCJ8	tdk	6.39	23.4	317448	0	0	497739	0	507347
Membrane spanning protein TolA	Q1REI6	tolA	9.09	42.7	4.73306e+06	5.31577e+06	5.55299e+06	7.42505e+06	6.82639e+06	2.75593e+06
Thiazolinyl-S-HMWP1 reductase	Q1RAF8	ybtU	6.79	40.9	2.82139e+07	1.85797e+07	1.64776e+07	4.42638e+07	3.18445e+07	1.84598e+07
3-deoxy-D-manno-octulosonic-acid transferase (KDO) transferase	Q1R4W0	kdtA	9.79	47.3	1.4958e+07	2.06764e+07	2.22984e+07	2.35024e+07	2.16071e+07	2.25936e+07
Fumarate reductase flavoprotein subunit	Q1R3A3	frdA	6.28	65.9	1.19558e+09	1.3498e+09	1.35162e+09	1.88206e+09	1.69046e+09	9.52926e+08
Polyphosphate kinase	Q1R8N7	ppk	8.92	80.6	6.11038e+07	6.02446e+07	4.88154e+07	9.60212e+07	5.44919e+07	3.02494e+07
Transcriptional regulator MraZ	Q1RGB4	mraZ	6.1	18.6	2.99452e+06	7.70714e+06	1.99761e+06	4.66298e+06	1.51215e+07	1.71534e+07
Superoxide dismutase	Q1R411	sodA	6.96	23.3	6.07653e+06	8.09418e+06	1.53337e+07	9.48183e+06	1.02328e+07	1.52108e+07
Uncharacterized protein	Q1R8Y6	ypdA	7.71	62.6	616888	1.10584e+06	875750	961244	848692	1.21635e+06
Lipid A export ATP-binding/permease protein MsbA	Q1RDU4	msbA	8.54	64.5	3.7433e+07	4.73937e+07	7.28949e+07	5.82645e+07	5.63673e+07	3.76586e+07
Cysteine desulfurase	Q1RBB6	sufS	6.34	44.4	6.0912e+06	8.75916e+06	6.68667e+06	9.52226e+06	5.6173e+06	4.18101e+06
Respiratory nitrate reductase 1 alpha chain	Q1RCL1	narG	6.54	140.5	2.95953e+08	3.59991e+08	3.97187e+08	4.63121e+08	4.06285e+08	4.22632e+08
Membrane protein insertase YidC	Q1R4M9	yidC	7.99	61.5	8.5319e+07	1.04343e+08	1.66134e+08	1.33493e+08	1.18153e+08	8.46308e+07
Sensor kinase-phosphotransferase CpxA	Q1R407	cpxA	5.83	51.6	2.68427e+07	3.1218e+07	3.2005e+07	4.18685e+07	3.55372e+07	2.71654e+07
50S ribosomal protein L14	Q1R617	rplN	10.42	13.5	2.74093e+08	2.79822e+08	1.25233e+08	4.23715e+08	5.40587e+08	2.77865e+08
Component of SufB-SufC-SufD cysteine desulfurase (SufS) activator complex	Q1RBB3	sufB	5.26	56.3	4.64324e+06	5.7131e+06	5.09231e+06	7.21243e+06	4.16306e+06	1.93312e+06
Ribosomal RNA large subunit methyltransferase G	Q1R6P6	ygjO	6.8	42.3	2.67035e+06	3.44969e+06	1.02694e+06	4.14148e+06	1.33262e+06	1.15916e+06
DNA gyrase subunit B	Q1R4N8	gyrB	6.06	90	1.55693e+08	1.32794e+08	9.09441e+07	2.41165e+08	1.14755e+08	5.9527e+07
Cytoskeleton protein RodZ	Q1R8L7	yfgA	5.74	36.1	1.11945e+08	1.04356e+08	1.77915e+08	1.732e+08	1.57407e+08	8.00415e+07
Bifunctional polymyxin resistance protein ArnA	Q1R9G0	yfbG	7.06	74.3	8.85056e+06	9.99111e+06	4.89039e+06	1.37486e+07	7.27773e+06	1.51774e+06
Asparagine--tRNA ligase	Q1RDS7	asnC	5.31	52.5	5.50741e+07	7.38296e+07	6.88251e+07	8.55534e+07	5.12362e+07	3.12384e+07
NAD(P) transhydrogenase subunit alpha	Q1RBJ5	pntA	5.85	56.4	1.38411e+08	1.57518e+08	2.14978e+08	2.13974e+08	1.84679e+08	1.79359e+08
Aerobic respiration control sensor protein	Q1R6C4	arcB	5.1	88	1.88305e+07	1.99036e+07	2.14423e+07	2.92057e+07	2.11135e+07	8.89218e+06
tRNA-2-methylthio-N(6)-dimethylallyladenosine synthase	Q1REQ5	UTI89_C0659	5.34	53.6	2.68524e+07	3.13642e+07	1.85763e+07	4.12524e+07	1.42576e+07	6.84697e+06
ATP-dependent helicase HrpA	Q1RC01	hrpA	7.78	148.8	4.12811e+07	4.36482e+07	4.04942e+07	6.33722e+07	3.18588e+07	1.81368e+07
Putative ATP-binding component of a transport system	Q1R5T0	yheS	5.8	71.8	1.13048e+07	1.40928e+07	7.09713e+06	1.73808e+07	1.08009e+07	4.42252e+06
Elongation factor 4	Q1R8G3	lepA	5.67	66.5	7.618e+07	8.11573e+07	6.89182e+07	1.17558e+08	7.49712e+07	4.03547e+07
Poly(A) polymerase I	Q1RG47	pcnB	9.66	54.6	6.8703e+06	9.53478e+06	3.11347e+06	1.05783e+07	7.13781e+06	1.35633e+06
Probable dimethyl sulfoxide reductase chain YnfF	Q1RBL1	ynfF	7.11	90	4.46065e+07	4.44607e+07	5.20127e+07	6.87968e+07	6.81169e+07	4.85503e+07
Uncharacterized protein	Q1RDV3	ycaO	4.56	67	8.53901e+06	8.32878e+06	5.93423e+06	1.30882e+07	4.33864e+06	2.07896e+06
tRNA uridine 5-carboxymethylaminomethyl modification enzyme MnmG	Q1R4J1	gidA	6.64	69.5	6.78655e+06	4.67562e+06	1.81982e+06	1.04134e+07	2.70651e+06	0
Glycerol metabolism operon regulatory protein	Q1RCN8	UTI89_C1394	6.6	70.9	184620	693353	143440	281831	211711	0
Catecholate siderophore receptor Fiu	Q1REC0	ybiL	5.91	81.8	3.10719e+07	4.1608e+07	5.32978e+07	4.75563e+07	4.20161e+07	2.84831e+07
Glucose-6-phosphate isomerase	Q1R3R3		6.37	61.5	4.41047e+08	5.16251e+08	3.37285e+08	6.75054e+08	2.46954e+08	1.02642e+08
30S ribosomal protein S1	Q1RDU7	rpsA	4.98	61.1	6.65485e+08	6.288e+08	4.20506e+08	1.01975e+09	5.7226e+08	2.91543e+08
60 kDa chaperonin	Q1R3B6	groEL	4.94	57.3	1.93734e+09	2.19516e+09	3.5509e+09	2.96842e+09	2.74594e+09	1.717e+09
Probable phosphatase YcdX	Q1RDC7	ycdX	6.05	26.8	322975	690353	500016	491802	809527	0
Citrate synthase	Q1REK6	gltA	6.68	48	4.21503e+08	4.89559e+08	3.91849e+08	6.41983e+08	3.10806e+08	2.46625e+08
Glucarate dehydratase	Q1R7Q5	gudD	6.07	49.1	5.84427e+07	6.47064e+07	3.26746e+07	8.89446e+07	3.6423e+07	1.83044e+07
DNA primase	Q1R6R4	dnaG	6	65.5	3.13403e+06	1.44891e+06	3.30456e+06	4.74909e+06	2.3247e+06	1.04271e+06
Imidazole glycerol phosphate synthase subunit HisF	Q1RA48	hisF	5.4	28.4	823450	773538	496017	1.25164e+06	174559	365332
Cytidine deaminase	Q1R9T0	cdd	5.73	31.5	1.25743e+06	2.60832e+06	1.32585e+06	1.91238e+06	2.09495e+06	1.07114e+06
ATP-dependent RNA helicase RhlE	Q1RED0	rhlE	10.05	50	6.07527e+06	4.61715e+06	6.63698e+06	9.20795e+06	6.08778e+06	7.50746e+06
50S ribosomal protein L19	Q1R8B9	rplS	10.62	13.1	9.21625e+07	9.22709e+07	5.87749e+07	1.38958e+08	2.35049e+08	1.60343e+08
Isocitrate dehydrogenase [NADP]	Q1RD16	icdA	5.4	45.7	5.24394e+08	6.72429e+08	3.42391e+08	7.92302e+08	3.07746e+08	1.95658e+08
Ribonuclease E	Q1RD73	rne	5.64	118.1	2.11143e+08	1.82044e+08	1.63124e+08	3.18722e+08	2.12224e+08	1.00899e+08
DNA-binding transcriptional regulator NtrC	Q1R445	glnG	6.74	54.6	1.13787e+07	1.78015e+07	1.36519e+07	1.71407e+07	8.48626e+06	5.79649e+06
IroN protein	Q1RDG2	iroN	6.06	79.1	1.41068e+08	1.63377e+08	1.64848e+08	2.13684e+08	1.99042e+08	1.44275e+08
Uncharacterized protein	Q1R332	ytfM	8.76	64.9	6.47638e+07	7.75852e+07	1.37887e+08	9.68957e+07	1.0392e+08	6.04264e+07
Phage shock protein C	Q1RC60	pspC	6.7	13.5	4.5581e+06	4.91957e+06	6.26849e+06	6.82938e+06	8.00338e+06	7.33587e+06
Uncharacterized protein	Q1RA78	UTI89_C2268	5.06	89.8	1.45709e+06	695506	469285	2.17961e+06	789697	165226
Peptide chain release factor 1	Q1RCM7	prfA	5.26	40.5	1.02933e+06	620563	434507	1.54746e+06	721539	82768.5
Lysine--tRNA ligase	Q1R3D0	lysU	5.44	58.8	2.81289e+08	2.71656e+08	1.74935e+08	4.22504e+08	1.94223e+08	9.57593e+07
Malate synthase	Q1R3T3	aceB	5.68	61	3.93222e+07	4.03299e+07	2.60801e+07	5.88905e+07	2.10822e+07	6.25583e+06
UvrABC system protein B	Q1REF1	uvrB	5.24	76.2	6.74168e+07	5.95616e+07	3.62013e+07	1.0144e+08	4.36704e+07	2.14159e+07
Trehalose-6-phosphate synthase	Q1RAP1		7.01	53.5	7.79475e+07	8.61974e+07	5.7368e+07	1.16798e+08	6.05408e+07	4.18826e+07
Stress response kinase A	Q1R456	rdoA	5.14	38.1	2.1495e+06	2.21005e+06	543862	3.21149e+06	1.52949e+06	1.18431e+06
Hypothetical lipoprotein	Q1R730	yghG	9.39	14.7	739949	0	603979	1.10405e+06	1.34444e+06	1.11291e+06
Soluble lytic murein transglycosylase	Q1R249	slt	8.78	73.3	5.68956e+07	5.4824e+07	8.92544e+07	8.46067e+07	5.67947e+07	3.91937e+07
Protease 4	Q1RB26	sppA	6.2	67.2	3.81286e+07	3.907e+07	4.04924e+07	5.66435e+07	4.69867e+07	2.74597e+07
Peptide chain release factor 3	Q1R270	prfC	5.97	59.3	2.42223e+07	3.19147e+07	2.2606e+07	3.61944e+07	1.82633e+07	4.40189e+06
Ribonuclease G	Q1R693	rng	6.07	56	1.38147e+07	1.4993e+07	1.1743e+07	2.05406e+07	1.09199e+07	4.86115e+06
Efflux pump membrane transporter	Q1RF74	acrB	5.57	113.5	1.20953e+08	1.4076e+08	1.77853e+08	1.80643e+08	1.35981e+08	9.81067e+07
L-arabinose isomerase	Q1RGD7	araA	6.42	56.1	3.08228e+06	4.53933e+06	1.71581e+06	4.57836e+06	2.26806e+06	486264
DNA polymerase I	Q1R450	polA	5.58	103.2	1.50341e+08	1.37356e+08	8.14277e+07	2.24122e+08	1.0825e+08	3.47993e+07
Ribonucleoside-diphosphate reductase	Q1R9I2	nrdA	6.18	85.7	1.54352e+08	1.68456e+08	9.76297e+07	2.30505e+08	1.11779e+08	7.39289e+07
L-2-hydroxyglutarate oxidase LhgO	Q1R843	ygaF	8.78	48.5	3.17443e+07	2.65913e+07	3.61159e+07	4.69574e+07	5.84308e+07	2.67883e+07
Peptidylprolyl isomerase	Q1RF94	ybaU	5.07	68.1	2.43279e+08	2.22608e+08	2.91894e+08	3.5931e+08	3.20431e+08	1.47346e+08
ABC transporter ATP-binding protein	Q1RDR5	uup	5.47	72.1	7.1669e+06	6.26972e+06	3.16536e+06	1.06096e+07	5.83567e+06	589015
Oligopeptidase A	Q1R5B8	prlC	5.27	78.5	2.97461e+08	2.34586e+08	1.3702e+08	4.39534e+08	1.68427e+08	6.43794e+07
tRNA(Ile)-lysidine synthase	Q1RG01	tilS	7.53	48	2.01604e+06	1.18212e+06	206499	2.98185e+06	911099	201324
Probable cytosol aminopeptidase	Q1R2Z4	pepA	7.23	54.8	6.32973e+07	1.2645e+08	2.06221e+08	9.3684e+07	1.90985e+08	1.43665e+08
UDP-N-acetylmuramoyl-L-alanyl-D-glutamate--2,6-diaminopimelate ligase	Q1RGB0	murE	5.67	53.3	2.13353e+07	2.14695e+07	1.72392e+07	3.16184e+07	1.75334e+07	9.7788e+06
Phosphoglucosamine mutase	Q1R6G2	glmM	6.02	47.5	2.66663e+07	6.09358e+07	4.99218e+07	3.94133e+07	5.20316e+07	4.56916e+07
Chaperone protein DnaK	Q1RGI8	dnaK	4.97	69.1	1.02295e+09	8.64009e+08	6.78335e+08	1.51236e+09	7.99303e+08	4.17288e+08
Nucleoid occlusion factor SlmA	Q1R4V1	slmA	8.63	24.3	878700	337030	1.21706e+06	1.2911e+06	1.32684e+06	1.49046e+06
UPF0145 protein YbjQ	Q1RE59	ybjQ	4.97	11.4	2.65486e+07	3.81978e+07	3.57634e+07	3.90845e+07	4.08774e+07	2.57568e+07
Uncharacterized protein	Q1RCP1	ycgC	4.75	51.8	1.16688e+07	1.30025e+07	1.20133e+07	1.71585e+07	6.54646e+06	3.91154e+06
MgtA Mg2+-importing ATPase, P-type 1	Q1R313	mgtA	5.96	99.3	1.35027e+06	3.24887e+06	4.24068e+06	1.97825e+06	1.72266e+06	734932
Endopeptidase La	Q1RDQ9	UTI89_C1020	4.72	65.8	1.05098e+07	1.33721e+07	1.7279e+07	1.54532e+07	1.47658e+07	6.52946e+06
Cell division protein FtsN	Q1R3Y4	ftsN	10.17	35.8	1.2887e+07	2.18365e+07	1.51177e+07	1.89156e+07	2.22053e+07	1.9534e+07
Bifunctional aspartokinase/homoserine dehydrogenase	Q1R3X7	metL	5.58	88.8	1.48196e+07	1.41057e+07	7.40454e+06	2.18316e+07	1.00083e+07	1.2072e+07
Glutamine-hydrolyzing asparagine synthetase B	Q1REQ3	asnB	6.96	71.8	2.65e+07	3.96382e+07	2.51347e+07	3.90463e+07	1.84655e+07	1.29231e+07
Glutamate--cysteine ligase	Q1R808	gshA	5.39	58.2	4.04418e+07	3.13313e+07	2.11329e+07	5.95946e+07	1.78801e+07	6.6084e+06
Acetyl-coenzyme A synthetase	Q1R3J7	acs	5.72	72	4.30469e+07	3.5573e+07	3.35335e+07	6.32416e+07	2.30483e+07	8.57298e+06
Uncharacterized protein	Q1R7B1	yggE	6.71	26.6	1.76885e+07	2.44869e+07	2.02335e+07	2.57823e+07	2.73081e+07	2.48954e+07
Flavohemoprotein	Q1R8I3	hmpA	5.77	43.8	2.34415e+06	2.90071e+06	1.00308e+06	3.42664e+06	355898	0
Putative ATP-binding component of a transport system	Q1R327	ytfR	7.84	55.3	3.71507e+06	5.64813e+06	8.48479e+06	5.40783e+06	4.63733e+06	1.62104e+06
Translation initiation factor IF-2	Q1R6H0	infB	6.07	97.2	2.00881e+08	1.64753e+08	1.12689e+08	2.92703e+08	1.45643e+08	7.05601e+07
Vitamin B12 transporter BtuB	Q1R3U1		5.74	68.4	2.3066e+08	3.0411e+08	4.23344e+08	3.36931e+08	3.29432e+08	2.36696e+08
Proline--tRNA ligase	Q1RFZ4	proS	5.19	63.6	9.64632e+07	1.04657e+08	5.55896e+07	1.40903e+08	5.86554e+07	3.10845e+07
2-oxoglutarate dehydrogenase decarboxylase component	Q1REK0	sucA	6.49	105	9.59036e+08	9.11968e+08	7.54528e+08	1.39714e+09	8.13112e+08	5.01328e+08
NAD-dependent malic enzyme	Q1RBT9		5.38	63.1	5.87227e+07	5.08663e+07	2.83302e+07	8.60006e+07	3.27416e+07	1.20606e+07
Zinc metalloprotease	Q1RG13	ecfE	6.81	50.6	2.1184e+07	1.79053e+07	2.32018e+07	3.10271e+07	2.72528e+07	2.08997e+07
Uncharacterized protein	Q1R331	ytfN	5.03	136.7	3.11022e+07	3.0163e+07	3.20045e+07	4.51229e+07	3.47357e+07	1.85711e+07
Phosphoenolpyruvate carboxylase	Q1R3V5	ppc	5.68	99	1.46913e+08	1.42049e+08	8.38212e+07	2.12856e+08	9.34999e+07	4.31293e+07
NAD(P) transhydrogenase subunit beta	Q1RBJ6	pntB	6.14	48.7	7.30627e+07	9.49327e+07	1.25536e+08	1.06039e+08	9.18579e+07	7.66877e+07
Pyruvate dehydrogenase	Q1RE54	poxB	6.28	62	8.46019e+07	1.4081e+08	1.29975e+08	1.2292e+08	1.01659e+08	6.45632e+07
Uncharacterized protein	Q1RD50	ycfL	7.5	13.9	2.37139e+06	774550	2.47289e+06	3.42018e+06	7.39254e+06	6.02681e+06
Acetoacetate metabolism regulatory protein AtoC	Q1R9J5	atoC	6.43	52.1	2.07803e+06	1.8669e+06	884163	2.98904e+06	1.82749e+06	7.15428e+08
Uncharacterized protein	Q1R506	UTI89_C4130	7.03	48.4	186724	924386	203754	268293	272688	273245
ATP-dependent protease ATPase subunit HslU	Q1R3Y6	hslU	5.35	49.6	1.51787e+08	1.70462e+08	1.28731e+08	2.18176e+08	1.04112e+08	6.54051e+07
Peptidase B	Q1R8K9	pepB	5.77	46.2	5.3163e+07	4.97849e+07	2.78209e+07	7.63142e+07	2.13353e+07	1.02547e+07
Sec-independent protein translocase protein TatA	Q1R474	tatA	7.97	11.3	2.15588e+07	3.30869e+07	1.64138e+07	3.10499e+07	3.29376e+07	2.86338e+07
Probable third cytochrome oxidase, subunit I	Q1RDN4	appC	6.87	58	3.97675e+07	4.65473e+07	3.82337e+07	5.71647e+07	4.47819e+07	2.65659e+07
Agmatinase	Q1R791	speB	5.39	33.6	1.60711e+06	656044	3.207e+06	2.29528e+06	2.24614e+06	4.39586e+06
Uncharacterized protein	Q1R9G5	yfaZ	5.07	19.3	2.95939e+06	2.7295e+06	3.29109e+06	4.23745e+06	4.21096e+06	6.09194e+06
GTPase HflX	Q1R387	hflX	5.99	48.3	2.3937e+07	2.96083e+07	2.49999e+07	3.42608e+07	2.22262e+07	1.53864e+07
Bifunctional protein HldE	Q1R6S9	UTI89_C3488	5.41	51	1.50022e+08	1.85579e+08	1.63312e+08	2.14634e+08	1.36318e+08	9.2762e+07
NADH dehydrogenase I chain E	Q1R9D2	nuoE	5.68	18.6	3.49805e+06	2.95045e+06	6.01405e+06	4.99679e+06	5.45695e+06	8.92917e+06
Glycogen debranching enzyme	Q1R5J5	glgX	6.07	73.7	2.03538e+06	2.16665e+06	1.2587e+06	2.90795e+06	750988	0
Aconitate hydratase 2	Q1RG73	acnB	6.13	99.2	6.01344e+08	4.82734e+08	2.98309e+08	8.60643e+08	3.50898e+08	1.61581e+08
Keto-acid formate acetyltransferase	Q1R6L9	tdcE	5.78	85.9	2.32039e+07	1.95006e+07	6.76704e+06	3.32722e+07	1.18766e+07	1.20317e+07
Pyruvate kinase	Q1RAT0	pykA	7.21	56.9	1.45892e+08	1.76543e+08	1.27144e+08	2.08221e+08	1.02371e+08	5.93077e+07
Sensor protein PhoQ	Q1RD24	phoQ	5.76	55.2	8.79438e+06	1.04641e+07	1.17388e+07	1.25992e+07	7.76223e+06	5.00483e+06
Lambdoid prophage DLP12 Bor-like protein	Q1RCX7	ybcU	9.22	12.3	5.2208e+06	8.45371e+06	1.04339e+07	7.43889e+06	1.74093e+07	6.64972e+06
Probable cytochrome C peroxidase	Q1R585	yhjA	6.55	51.5	3.90541e+06	4.43501e+06	3.91353e+06	5.53967e+06	5.01067e+06	2.31016e+06
Hypothetical sigma-54-dependent transcriptional regulator ygeV	Q1R7G2	ygeV	6.54	66	4.99517e+06	4.4483e+06	1.66327e+06	7.08679e+06	2.88731e+06	198478
Sodium/proline symporter	Q1RDK1	putP	8.51	54.3	1.43064e+06	963813	190251	2.02676e+06	899434	0
Isoleucine--tRNA ligase	Q1RGH6	ileS	5.95	104.3	8.05734e+06	1.02579e+07	7.5653e+06	1.14216e+07	6.90834e+06	4.37278e+06
Arginine--tRNA ligase	Q1RAQ8	argS	5.55	64.7	5.14177e+07	5.47147e+07	3.3496e+07	7.29192e+07	2.95667e+07	9.5592e+06
Ethanolamine ammonia-lyase light chain	Q1R8T1	eutC	6.77	31.8	1.06491e+06	0	895477	1.51282e+06	0	0
ATP-dependent DNA helicase RecG	Q1R4T9	recG	7.72	77.6	3.3825e+06	2.73714e+06	1.41855e+06	4.79665e+06	1.75904e+06	270021
Signal recognition particle protein	Q1R8B5	ffh	9.51	49.8	6.76192e+07	7.16424e+07	6.4222e+07	9.59765e+07	6.05835e+07	4.6239e+07
30S ribosomal protein S12	Q1R5U1	rpsL; CSK29544_RS06375; AL524_RS00930; ENT638_RS19375	10.87	13.7	1.11916e+08	1.75574e+08	7.8639e+07	1.58478e+08	1.76512e+08	1.321e+08
Phosphohistidine phosphatase SixA	Q1R973	UTI89_C2624	4.64	17.2	1.11059e+06	641734	0	1.56325e+06	864389	548886
NADH-quinone oxidoreductase subunit A	Q1R9C9	nuoA	9.83	16.4	4.42351e+07	4.6468e+07	3.94754e+07	6.22081e+07	1.03015e+08	6.71175e+07
Putative lipoprotein YbjP	Q1RE60	ybjP	6.9	19.9	5.69654e+08	7.37544e+08	5.57607e+08	8.04863e+08	9.55695e+08	9.54996e+08
Uncharacterized protein	Q1RF32	ybbP	9.32	89.1	3.67115e+06	3.14399e+06	1.34075e+07	5.18291e+06	4.25272e+06	2.08257e+06
Glucans biosynthesis protein D	Q1RBZ1	mdoD	6.32	62.8	9.00194e+06	9.07827e+06	6.41119e+06	1.26594e+07	3.11367e+06	1.42397e+06
Uncharacterized protein	Q1RB09	yeaG	5.85	74.4	4.1338e+08	3.14934e+08	1.9958e+08	5.81968e+08	2.84579e+08	1.55737e+08
Selenocysteine-specific elongation factor	Q1R504	selB	6.61	68.8	2.24545e+07	2.10667e+07	1.73972e+07	3.156e+07	1.39584e+07	3.15327e+06
Putative salicylate synthetase	Q1RAG5	ybtS	5.91	48	6.01543e+07	5.90946e+07	3.09485e+07	8.48295e+07	3.9091e+07	1.80782e+07
Oxygen-independent coproporphyrinogen-III oxidase-like protein	Q1R772	yggW	5.55	42.6	1.074e+06	1.82601e+06	584047	1.51623e+06	170922	0
Phosphoribosylformylglycinamidine synthase	Q1R8H7		5.44	141.2	1.49104e+07	1.60242e+07	1.32563e+07	2.10416e+07	5.29809e+06	2.44481e+06
Putative polynucleotide enzyme	Q1RE22	ycaJ	6.4	49.6	9.60573e+06	8.57387e+06	3.61298e+06	1.34671e+07	6.05171e+06	3.25864e+06
Bacteriophage N4 adsorption protein A	Q1REZ6	nfrA	6.77	112.3	1.79084e+07	2.18852e+07	2.50499e+07	2.50237e+07	2.66724e+07	1.24994e+07
Putative uroporphyrin-III C-methyltransferase	Q1R4D5	hemX	4.75	43.4	1.63129e+08	1.56489e+08	2.17804e+08	2.28637e+08	2.6005e+08	1.62565e+08
Oxygen-dependent choline dehydrogenase	Q1RFM3	betA	5.95	62.6	1.44142e+07	1.1326e+07	5.09217e+06	2.02253e+07	1.56966e+07	3.7549e+06
Pectinesterase	Q1REF8	ybhC	6.27	46	1.57922e+08	2.50356e+08	2.74547e+08	2.2173e+08	2.41418e+08	2.28359e+08
Aspartate carbamoyltransferase regulatory chain	Q1R310	pyrI	7.37	17.1	1.03207e+06	2.20756e+06	1.44549e+06	1.44652e+06	1.3617e+06	768863
tRNA sulfurtransferase	Q1RFB7	yajK	6.61	54.9	5.23227e+06	4.99208e+06	2.34395e+06	7.3431e+06	2.28086e+06	256645
Sensor protein DcuS	Q1R3D7	yjdH	6.61	60.5	3.04373e+06	5.05406e+06	7.08424e+06	4.25252e+06	4.19661e+06	3.07633e+06
Uncharacterized protein	Q1RB34	ynjF	8.18	22.8	297663	422684	592752	412895	520609	495947
Outer membrane usher protein FimD	Q1R2J7	fimD	6.99	96.4	1.39194e+07	1.97338e+07	24482166	1.93996e+07	1.85502e+07	8.20006e+06
Alpha-1,4 glucan phosphorylase	Q1R5L7	malP	7.52	90.5	3.89655e+07	6.32444e+07	5.70925e+07	5.40821e+07	4.20656e+07	4.47515e+07
Glycerol dehydrogenase	Q1R3W6	gldA	4.98	40.1	1.39875e+07	1.78754e+07	2.32383e+07	1.94172e+07	2.98274e+07	2.66615e+07
NADP-dependent malate dehydrogenase	Q1R8R7	maeB	5.5	82.4	5.42306e+07	4.50797e+07	3.92845e+07	7.54403e+07	5.67474e+07	2.60384e+07
Bifunctional uridylyltransferase/uridylyl-removing enzyme	Q1RG23	glnD	6.73	102.3	4.48672e+06	3.80529e+06	3.28859e+06	6.22778e+06	2.74057e+06	735582
Osmolarity sensor protein EnvZ	Q1R5N1	envZ	6.81	50.4	2.93644e+06	4.29966e+06	2.76533e+06	4.08556e+06	4.32758e+06	3.97065e+06
Putative transcriptional regulator LYSR-type	Q1R9R4	yeiE	6.54	32.7	1.37918e+06	727971	691132	1.90415e+06	2.09372e+06	1.37148e+06
Uncharacterized protein	Q1R6S7	ygiF	5.96	48.5	4.27472e+07	5.18308e+07	3.95925e+07	5.91007e+07	2.78077e+07	1.94378e+07
ATP-dependent zinc metalloprotease FtsH	Q1R6G0	hflB	6.24	70.7	5.19282e+08	4.61881e+08	5.0387e+08	7.17281e+08	6.12453e+08	3.70956e+08
ATPase RavA	Q1R4I6		6.55	56.3	1.54003e+07	1.84067e+07	1.30766e+07	2.12538e+07	1.30548e+07	6.0795e+06
Transcriptional regulatory protein TyrR	Q1RC42	tyrR	5.88	58.7	4.69383e+07	3.97768e+07	3.35188e+07	6.49698e+07	2.95241e+07	1.62338e+07
Uracil permease	Q1R8P1	uraA	7.84	46.6	1.80467e+06	2.7189e+06	3.22409e+06	2.48865e+06	2.2817e+06	1.51311e+06
Beta-hexosaminidase	Q1RD47	ycfO	6.24	37.6	1.31622e+06	731939	246513	1.82295e+06	219436	271581
Argininosuccinate synthase	Q1R6G5	argG	5.39	49.9	6.90816e+07	6.86031e+07	4.60734e+07	9.5114e+07	4.16735e+07	1.93955e+07
NADH-quinone oxidoreductase subunit N	Q1R9E1	nuoN	8.47	52	2.1768e+06	3.02385e+06	6.00421e+06	2.99762e+06	2.49608e+06	4.02944e+06
Mannitol-specific PTS system enzyme IIABC components	Q1R4Z9	mtlA	6.49	67.9	2.81467e+08	3.00861e+08	4.8086e+08	3.88878e+08	3.51637e+08	2.05254e+08
Polyribonucleotide nucleotidyltransferase	Q1R6H4		5.19	77.1	3.51522e+08	2.95391e+08	1.87673e+08	4.83646e+08	2.33471e+08	1.45613e+08
30S ribosomal protein S9	Q1R6B0	rpsI; CSK29544_RS02840; AL524_RS00415	10.95	14.8	1.17718e+08	1.86791e+08	1.20202e+08	1.62494e+08	2.362e+08	1.80183e+08
Pyridoxine/pyridoxamine 5'-phosphate oxidase	Q1RBF7	pdxH	8.92	25.6	7.43953e+06	9.09691e+06	7.88286e+06	1.01966e+07	2.0607e+07	1.43484e+07
Uncharacterized protein	Q1RBD1	ydhQ	4.53	42.8	4.64006e+06	5.51798e+06	5.66574e+06	6.37527e+06	4.58536e+06	2.23214e+06
Protein HflK	Q1R386	hflK	6.02	45.5	2.93836e+08	3.90109e+08	4.65028e+08	4.01278e+08	4.06572e+08	3.29296e+08
GTPase Der	Q1R8M2	engA	5.96	56.6	5.88932e+07	5.89251e+07	4.73795e+07	8.04714e+07	4.53483e+07	2.92778e+07
Ribosomal RNA small subunit methyltransferase B	Q1R644	sun	7.28	48.3	5.35094e+06	4.34505e+06	2.41393e+06	7.31681e+06	2.58755e+06	197563
Histidine--tRNA ligase	Q1R8L9	hisS	5.91	47	2.87111e+07	4.00303e+07	2.17226e+07	3.92798e+07	2.75457e+07	1.16137e+07
Biosynthetic arginine decarboxylase	Q1R789	speA	4.97	74.3	5.19026e+07	4.61464e+07	2.27983e+07	7.11384e+07	2.73428e+07	7.34567e+06
Alcohol dehydrogenase, propanol-preferring	Q1RBU0	adhP	6.71	36.4	2.09575e+07	2.30929e+07	3.49706e+07	2.87293e+07	2.97488e+07	3.01795e+07
Cardiolipin synthase B	Q1RED8	ybhO	8.35	47.5	1.1194e+06	698345	715168	1.5293e+06	1.27907e+06	1.25479e+06
UvrABC system protein A	Q1R3L2	uvrA	6.64	103.8	4.86717e+07	3.43543e+07	2.35065e+07	6.66719e+07	3.07659e+07	2.51068e+07
Transcription-repair-coupling factor	Q1RD40	mfd	6.07	132.3	6.16701e+07	6.16456e+07	5.16379e+07	8.43642e+07	4.48646e+07	2.68973e+07
N-acetylglucosamine PTS permease	Q1REP7	nagE	6.16	68.3	7.46977e+07	7.46925e+07	8.96916e+07	1.02699e+08	9.14568e+07	5.66772e+07
50S ribosomal protein L15	Q1R630	rplO; AL524_RS00795	11.18	15	2.27771e+08	2.81183e+08	1.84448e+08	3.11266e+08	3.451e+08	3.07998e+08
Formate dehydrogenase-N beta subunit	Q1RBU5	fdnH	5.92	32.1	1.76227e+07	1.95025e+07	1.75461e+07	2.42112e+07	2.08351e+07	2.21974e+07
UDP-N-acetylglucosamine 1-carboxyvinyltransferase	Q1R6E7	murA	6.16	44.8	3.80447e+07	4.92008e+07	3.6705e+07	5.16105e+07	3.34088e+07	1.1948e+08
Stationary phase inducible protein CsiE	Q1R8J7	csiE	7.77	49.8	2.39641e+06	630397	815005	3.25704e+06	2.06815e+06	862231
Uncharacterized protein	Q1RFM9	UTI89_C0334	4.82	80.8	2.90151e+07	2.51163e+07	4.17377e+07	3.95044e+07	2.00513e+07	1.04837e+07
Uncharacterized protein	Q1RBW5	yncE	9.1	38.6	2.45107e+07	3.10029e+07	4.15206e+07	3.33148e+07	4.50218e+07	4.43709e+07
Acriflavine resistance protein A	Q1RF73	acrA	8.43	43.5	2.98656e+08	3.79556e+08	3.57697e+08	4.05935e+08	3.90457e+08	2.57656e+08
Alpha-1,4 glucan phosphorylase	Q1R5J8	glgP	5.96	93.1	3.07005e+07	2.76529e+07	1.93257e+07	4.16274e+07	1.74029e+07	6.46564e+06
Phosphoenolpyruvate-protein phosphotransferase	Q1R8V4	ptsI	4.87	63.5	2.83302e+08	2.37178e+08	1.61204e+08	3.83936e+08	1.56665e+08	6.46544e+07
50S ribosomal protein L9	Q1R357	rplI	6.58	15.8	2.69937e+08	3.6267e+08	1.89995e+08	3.68244e+08	4.12343e+08	3.21826e+08
Osmotically inducible lipoprotein E	Q1RB55	osmE	7.87	12	3.51105e+09	3.76828e+09	3.20114e+09	4.72558e+09	6.50561e+09	6.18127e+09
Chaperone protein ClpB	Q1R8D3	clpB	5.52	95.9	1.72686e+09	1.48771e+09	9.35406e+08	2.32386e+09	9.50535e+08	6.07952e+08
Periplasmic serine endoprotease DegP-like	Q1R6A5	degQ	6.67	48.8	4.23612e+07	4.25768e+07	5.86323e+07	5.70003e+07	6.39698e+07	3.9356e+07
Multidrug resistance protein A	Q1R813	emrA	9.23	43.2	1.97791e+07	3.03877e+07	2.6998e+07	2.67227e+07	2.07437e+07	1.48416e+07
Galactose/methyl galactoside import ATP-binding protein MglA	Q1R9S4	mglA	7.64	56.3	2.48613e+07	2.91655e+07	2.14793e+07	3.36172e+07	2.21799e+07	1.32455e+07
Gamma-aminobutyraldehyde dehydrogenase	Q1RBX3	ydcW	6.1	50.8	2.41856e+06	2.35225e+06	3.26134e+06	3.27307e+06	1.70294e+06	854968
NADH-quinone oxidoreductase subunit F	Q1R9D3	nuoF	6.86	49.3	2.81943e+08	4.24727e+08	5.17579e+08	3.80571e+08	4.01315e+08	3.31142e+08
L-fucose isomerase	Q1R7N8	fucI	6.18	64.9	1.08853e+06	751889	644127	1.47139e+06	528630	100783
DNA mismatch repair protein MutS	Q1R7W4	mutS	5.55	95.3	5.78339e+07	4.67752e+07	2.85082e+07	7.83464e+07	3.85143e+07	1.55554e+07
Cysteine synthase	Q1R8V7	cysK	6.06	34.5	2.37231e+07	1.946e+07	3.19045e+07	3.18493e+07	3.91318e+07	4.26408e+07
Putative synthetase/amidase	Q1R6U5	ygiC	4.78	44.9	2.66643e+07	3.39024e+07	2.37512e+07	3.5655e+07	2.60051e+07	2.19787e+07
Capsule polysaccharide export protein KpsC	Q1R751	kpsC	9.1	75.8	3.28723e+06	2.01655e+06	2.48552e+06	4.41269e+06	3.21848e+06	655594
LPS-assembly protein LptD	Q1RGE3	imp	5.3	89.6	2.94998e+08	3.62252e+08	4.71194e+08	3.95541e+08	3.64045e+08	2.80848e+08
Exoribonuclease 2	Q1RC77	rnb	5.68	72.4	4.02154e+07	3.9839e+07	2.09651e+07	5.39684e+07	2.48213e+07	1.00849e+07
Chaperone protein HtpG	Q1RF62	htpG	5.21	71.4	5.39642e+08	4.75039e+08	2.59389e+08	7.24962e+08	2.78678e+08	1.36395e+08
Transcription termination/antitermination protein NusA	Q1R6G8	nusA	4.64	54.8	3.86714e+07	3.65751e+07	3.051e+07	5.16489e+07	2.76913e+07	9.02564e+06
Putative amino acid ABC transporter ATP-binding protein yecC	Q1RAM3	yecC	9.23	27.7	1.55771e+07	1.83979e+07	2.27512e+07	2.09463e+07	3.17e+07	2.5111e+07
Valine--tRNA ligase	Q1R2Z6	valS	5.34	108.1	5.60529e+07	5.33325e+07	3.13253e+07	7.5029e+07	2.64383e+07	1.37843e+07
UDP-N-acetylmuramate--L-alanine ligase	Q1RGA4	murC	5.76	53.6	2.50081e+07	1.83352e+07	1.53322e+07	3.33972e+07	1.91659e+07	9.40481e+06
Uncharacterized protein	Q1R6E0	yrbE	9.98	27.8	2.02384e+06	882278	3.23517e+06	2.69597e+06	2.27063e+06	2.43141e+06
Uncharacterized protein	Q1R2Z0	yjgR	5.96	54.4	3.15312e+07	2.83024e+07	3.06725e+07	4.19869e+07	2.68845e+07	1.77867e+07
Dual-specificity RNA methyltransferase RlmN	Q1R8L6	yfgB	6.99	43.1	927361	658616	659455	1.23234e+06	304823	539884
Vitamin B12 import ATP-binding protein BtuD	Q1RB86	btuD	9.11	27.1	934674	1.23176e+06	503099	1.24143e+06	494893	326663
Lysine--tRNA ligase	Q1R7E1	lysS	5.24	57.6	5.95926e+07	4.58454e+07	2.88373e+07	7.93866e+07	3.18781e+07	1.2628e+07
Glycine--tRNA ligase beta subunit	Q1R537	glyS	5.44	76.8	2.62149e+08	2.13592e+08	1.26687e+08	3.49283e+08	1.70302e+08	7.81905e+07
Acetyltransferase component of pyruvate dehydrogenase complex	Q1RG76	aceF	5.17	66.1	8.20671e+08	7.52425e+08	6.05876e+08	1.09374e+09	7.73754e+08	4.87166e+08
Uncharacterized protein	Q1R8T9	yfeY	5.22	20.8	2.59519e+07	4.25847e+07	3.66305e+07	3.43809e+07	3.78535e+07	3.64283e+07
Uncharacterized protein	Q1RB05	UTI89_C1983	7.46	17.8	4.09074e+06	5.67938e+06	2.21078e+06	5.40506e+06	2.08693e+06	2.03267e+06
DNA methylase M	Q1R2G0	hsdM	5.22	59.3	4.7119e+07	4.59245e+07	3.1357e+07	6.21172e+07	3.57821e+07	2.04458e+07
DNA topoisomerase 4 subunit A	Q1R6X1	parC	6.68	83.8	1.99396e+07	1.43623e+07	9.89305e+06	2.64167e+07	1.0258e+07	5.13984e+06
Beta-barrel assembly-enhancing protease	Q1R8P4	yfgC	7.27	53.9	2.32941e+07	2.75584e+07	1.61187e+07	3.06827e+07	1.67496e+07	8.46486e+06
Sulfurtransferase	Q1RB35	UTI89_C1953	6.42	48.8	1.20539e+07	1.43723e+07	8.38332e+06	1.5883e+07	4.39267e+06	1.579e+06
50S ribosomal protein L16	Q1R613	rplP	11.22	15.3	8.99983e+07	1.34277e+08	1.27614e+08	1.1901e+08	1.85996e+08	2.01482e+08
Queuine tRNA-ribosyltransferase	Q1RFD5	tgt	6.4	42.6	1.02362e+06	0	0	1.33933e+06	824953	235294
Hypothetical type II secretion protein GspG	Q1R735	gspG	4.98	16.6	551692	0	0	723530	760797	635854
tRNA 5-methylaminomethyl-2-thiouridine biosynthesis bifunctional protein MnmC	Q1R988	mnmC	6.05	74.3	1.64033e+06	1.44255e+06	534874	2.14821e+06	1.2333e+06	0
Bifunctional glutamine synthetase adenylyltransferase/adenylyl-removing enzyme	Q1R6S8	glnE	5.41	112.4	2.08916e+07	2.34667e+07	2.18777e+07	2.74071e+07	1.71561e+07	1.44485e+07
Regulator of ribonuclease activity A	Q1R3Y9	menG	4.2	17.4	3.77293e+06	3.76966e+06	7.48757e+06	4.95026e+06	7.3021e+06	5.06565e+06
Aspartate--tRNA ligase	Q1RAR8	aspS	5.77	65.8	6.12459e+07	5.94344e+07	4.05356e+07	8.0023e+07	3.93671e+07	1.3953e+07
Dihydrolipoyllysine-residue succinyltransferase component of 2-oxoglutarate dehydrogenase complex	Q1REJ9	sucB	5.81	44	6.31679e+08	5.87673e+08	8.12836e+08	8.27764e+08	7.48175e+08	3.9229e+08
Glucose-6-phosphate 1-dehydrogenase	Q1RAT3	zwf	5.76	55.7	8.94954e+07	1.01514e+08	6.9583e+07	1.1753e+08	5.25687e+07	3.27535e+07
Putative transporter protein	Q1R7G7	UTI89_C3248	9.1	45.1	874544	1.5184e+06	2.64036e+06	1.14115e+06	949004	8.99698e+06
Peptidyl-dipeptidase dcp	Q1RBM5	dcp	5.76	80.1	2.43352e+07	1.63844e+07	5.0206e+06	3.16498e+07	7.02815e+06	4.30814e+07
Putative inner membrane lipoprotein	Q1R211	cjrA	7.65	32.8	6.79963e+06	2.16926e+06	4.87253e+06	8.82781e+06	7.96869e+06	7.45853e+06
Putative outer membrane protein	Q1RAY8	yeaY	9.54	20.9	1.7692e+08	1.3581e+08	2.34001e+08	2.29974e+08	3.3617e+08	3.48229e+08
Uncharacterized protein	Q1R4Y1	yibN	9.33	16	8.0866e+07	6.30438e+07	5.00186e+07	1.04869e+08	1.30169e+08	9.78631e+07
Putative cytochrome oxidase	Q1R8W3	yfeH	9.44	36.4	774433	1.57379e+06	1.76663e+06	1.00806e+06	1.83079e+06	1.87426e+06
Uncharacterized protein	Q1R6S6	ygiM	9.11	23.1	5.92e+07	5.73915e+07	7.6098e+07	7.68349e+07	9.58122e+07	8.17658e+07
Anti-sigma-E factor RseA	Q1R8G0	rseA	5.2	24.3	731329	1.55333e+06	1.85042e+06	950580	2.64363e+06	2.56424e+06
Uncharacterized protein	Q1R565	yhjU	6.6	62	7.62179e+06	8.91827e+06	1.38176e+07	9.88677e+06	1.26036e+07	3.82498e+06
Chromosome partition protein MukB	Q1RDT3	mukB	5.35	170.1	5.89195e+07	5.13753e+07	3.41548e+07	7.65503e+07	3.87812e+07	1.72265e+07
Colicin I receptor	Q1R9R7	cirA	5.39	77	9.13232e+07	1.19275e+08	1.34162e+08	1.18312e+08	1.22846e+08	4.6773e+07
Ribonuclease R	Q1R381	vacB	8.53	93.7	1.5082e+08	1.2801e+08	9.33092e+07	1.96259e+08	1.03421e+08	4.11836e+07
Uncharacterized protein	Q1R4R8	yicN	6.38	18.2	432083	0	200877	556782	802229	538930
Protease HtpX	Q1RAV8	htpX	7.14	31.9	6.01042e+07	6.19717e+07	6.55538e+07	7.74711e+07	8.62668e+07	6.89296e+07
RNA polymerase-binding transcription factor DksA	Q1RG45	dksA	5.36	18.3	693145	923332	1.14724e+06	893311	762704	854536
Multidrug resistance protein B	Q1R812	emrB	8.18	56	415582	1.33882e+06	253875	537462	0	0
Spermidine/putrescine import ATP-binding protein PotA	Q1RD28	potA	5.3	43	1.20878e+07	1.47201e+07	1.6671e+07	1.55672e+07	1.78637e+07	1.52897e+07
Aldehyde-dehydrogenase like protein YneI	Q1RBP2	yneI	5.74	50.6	643407	739083	216691	832029	262378	273932
Protein YijP	Q1R3V6	yijP	7.42	68.3	3.61544e+07	4.62753e+07	6.55701e+07	4.67632e+07	4.99451e+07	3.34658e+07
Acetate kinase	Q1R9B8	UTI89_C2579	6.28	43.3	9.12416e+06	1.46308e+07	1.3529e+07	1.17919e+07	1.24982e+07	1.22281e+07
Carbon starvation protein A	Q1REW4	cstA	7.9	75.1	1.51391e+07	2.3126e+07	3.19766e+07	1.93716e+07	1.90729e+07	1.4351e+07
Trigger factor	Q1RFA0	tig	4.88	47.8	1.68099e+08	1.96257e+08	2.12043e+08	2.1444e+08	1.87314e+08	1.19376e+08
Endonuclease R	Q1R2F8	hsdR	5.85	133.9	3.52253e+07	3.61952e+07	2.21603e+07	4.50781e+07	1.88294e+07	1.75608e+07
Hypothetical ABC transporter ATP-binding protein ybiT	Q1REA4	ybiT	5.08	59.8	2.59335e+07	2.14672e+07	1.79311e+07	3.33206e+07	1.41141e+07	5.45045e+06
Lipopolysaccharide assembly protein B	Q1RC85	yciM	6.39	44.5	1.70719e+07	1.49177e+07	1.6636e+07	2.17937e+07	1.78863e+07	1.79696e+07
Uncharacterized protein	Q1R9P2	yejA	8.7	70	1.16132e+07	1.41691e+07	7.88371e+06	1.48918e+07	6.59745e+06	3.59955e+06
Putative N-acetylmannosamine-6-phosphate 2-epimerase	Q1R6B7	yhcJ	5.27	25.5	442151	984998	0	564558	542889	0
Aldehyde-alcohol dehydrogenase	Q1RCJ6	adhE	6.79	96.1	9.43049e+08	1.26753e+09	1.43285e+09	1.20647e+09	1.24719e+09	1.10561e+09
Probable N-acetylmuramoyl-L-alanine amidase AmiA	Q1R8T6	amiA	10.15	31.4	5.05637e+06	4.74292e+06	5.76256e+06	6.45348e+06	5.70821e+06	6.56928e+06
Pyruvate dehydrogenase E1 component	Q1RG77	aceE	5.68	99.6	1.94746e+09	2.01276e+09	1.45227e+09	2.50069e+09	1.62269e+09	1.15828e+09
Sulfite reductase [NADPH] hemoprotein beta-component	Q1R7T5	cysI	7.62	63.9	9.39307e+06	1.31663e+07	2.28986e+07	1.19143e+07	2.7128e+07	9.54148e+06
Uncharacterized protein	Q1R7P7	ygdH	6.48	50.9	8.32487e+07	8.17835e+07	4.4957e+07	1.05706e+08	4.58575e+07	2.62399e+07
N-methyl-L-tryptophan oxidase	Q1RD98	solA	5.36	40.9	1.41502e+06	2.97606e+06	1.366e+06	1.79894e+06	1.11179e+06	320814
Putative molybdenum transport ATP-binding protein modF	Q1REH1	modF	6.01	55	3.8208e+06	3.52935e+06	4.48414e+06	4.84012e+06	2.9099e+06	1.13602e+06
Phenylalanine--tRNA ligase beta subunit	Q1RB82	pheT	5.27	87.2	1.18177e+08	1.01493e+08	6.07127e+07	1.49794e+08	6.25823e+07	2.85942e+07
Threonine--tRNA ligase	Q1RB76	thrS	6.19	74	1.65337e+08	1.72652e+08	8.42493e+07	2.09977e+08	9.51951e+07	5.38722e+07
N-acetylglucosamine-6-phosphate deacetylase	Q1REQ0	nagA	5.97	41	3.85146e+06	5.57209e+06	3.08027e+06	4.90751e+06	6.02698e+06	2.94988e+06
Isocitrate lyase	Q1R3T2	aceA	5.48	48.1	4.99827e+08	5.0424e+08	296831740	6.37154e+08	2.83997e+08	1.49841e+08
Exodeoxyribonuclease I	Q1RA61	sbcB	5.73	56.3	1.2493e+07	1.2888e+07	9.55875e+06	1.59011e+07	7.25809e+06	3.14148e+06
UvrABC system protein C	Q1RAM7	uvrC	9.01	68.2	2.44278e+06	2.71019e+06	1.03561e+06	3.10615e+06	1.86765e+06	341316
D-amino acid dehydrogenase	Q1RCQ7	dadA	6.62	47.8	1.12772e+08	1.18647e+08	1.30382e+08	1.42774e+08	1.11212e+08	6.40543e+07
Uncharacterized protein	Q1RA77	UTI89_C2269	6.04	33.8	413152	586919	313631	519636	518622	314318
Uncharacterized protein	Q1R6N2	yqjD	9.09	11	1.14527e+09	1.06905e+09	9.56953e+08	1.44001e+09	1.69161e+09	1.34242e+09
Uncharacterized protein	Q1R5S4	yhfK	9.01	79.9	1.72622e+06	4.25384e+06	2.61888e+06	2.16663e+06	1.4783e+06	641654
Ferrichrome-iron receptor FhuA	Q1RG38	fhuA	5.48	82.1	1.21969e+08	1.14745e+08	1.71471e+08	1.54151e+08	1.60202e+08	8.7622e+07
Histone-like protein, located in outer membrane or nucleoid	Q1RG11	hlpA	9.7	17.7	1.36896e+08	1.54595e+08	1.32924e+08	1.72771e+08	1.94916e+08	1.91144e+08
Putative ATP-binding protein of peptide transport system	Q1RC68	sapD	9	37.6	1.78956e+07	1.5494e+07	1.41036e+07	2.25845e+07	1.77739e+07	1.5616e+07
Undecaprenyl phosphate-alpha-4-amino-4-deoxy-L-arabinose arabinosyl transferase	Q1R9F8	arnT	8.98	62.5	608967	1.0468e+06	1.27524e+06	767968	556704	763039
Fructose-bisphosphate aldolase class II	Q1R7A8	fba	6.35	42.7	1.06522e+09	1.29571e+09	5.9811e+08	1.34738e+09	6.36326e+08	3.80445e+08
Biosynthetic peptidoglycan transglycosylase	Q1R6C6	mtgA	9.98	27.3	452404	343216	441201	569776	348558	409694
D-alanyl-D-alanine carboxypeptidase, fraction A penicillin-binding protein 5	Q1RET0	dacA	8.28	44.4	2.72232e+08	2.77941e+08	2.88318e+08	3.43662e+08	3.18718e+08	2.87588e+08
Probable acetyl-CoA acetyltransferase	Q1R7G8	yqeF	5.87	41.1	1.51866e+06	1.39972e+06	1.25541e+06	1.90735e+06	1.16626e+06	880134
YbtT protein	Q1RAF7	ybtT	6.28	29.3	1.80263e+06	1.05472e+06	360222	2.24963e+06	1.60226e+06	1.2745e+06
Putative sensor-like histidine kinase YfhK	Q1R8H8	yfhK	7.23	55.6	4.2134e+06	3.18965e+06	6.53555e+06	5.24675e+06	6.58216e+06	1.00163e+06
Uncharacterized protein	Q1RDJ0	UTI89_C1090	6.8	70.8	1.88732e+07	1.85833e+07	1.30738e+07	2.35529e+07	1.25323e+07	5.87185e+06
Uncharacterized protein	Q1R2S4	UTI89_C4937	5.68	113.4	5.18721e+07	4.07591e+07	3.67523e+07	6.48454e+07	3.16409e+07	1.57086e+07
ATP-dependent Clp protease ATP-binding subunit ClpX	Q1RF97	clpX	5.35	46.3	5.84489e+07	5.96912e+07	5.74674e+07	7.32923e+07	6.34244e+07	3.86095e+07
Putative GTP-binding factor	Q1R442	typA	5.33	67.3	2.4369e+08	2.09437e+08	1.46196e+08	3.04357e+08	1.58694e+08	8.01504e+07
tRNA(Met) cytidine acetyltransferase TmcA	Q1R8Q3	ypfI	7.06	74.9	381491	374619	128215	476590	0	0
Cellulose synthase operon protein C	Q1R573	yhjL	6.14	127.9	4.95643e+07	5.31744e+07	7.83082e+07	6.17078e+07	5.96412e+07	3.99958e+07
Glc operon transcriptional activator	Q1R722	glcC	9.79	31	6.14553e+06	5.06106e+06	4.3628e+06	7.7044e+06	6.8861e+06	7.99999e+06
Outer membrane protein TolC	Q1R6U8	tolC	5.66	55.1	1.13002e+09	1.16237e+09	2.16015e+09	1.41379e+09	1.57731e+09	1.75017e+09
UTP--glucose-1-phosphate uridylyltransferase	Q1RCK2	galU	5.24	32.9	9.72009e+07	1.35615e+08	6.60926e+07	1.21295e+08	5.49899e+07	3.2936e+07
Ubiquinol oxidase subunit 2	Q1RFA7	cyoA	7.3	34.9	1.82104e+08	1.74895e+08	2.1762e+08	2.27858e+08	2.31681e+08	2.28631e+08
Carbamoyl-phosphate synthase small chain	Q1RGG8	carA	6.27	42.4	2.06943e+07	2.26739e+07	1.25944e+07	2.59146e+07	9.80908e+06	3.31041e+06
Phosphatidylserine decarboxylase proenzyme	Q1R397	psd	5.57	36	1.05847e+08	7.1278e+07	9.20147e+07	1.31778e+08	1.42369e+08	1.27096e+08
DNA topoisomerase 1	Q1RC93	topA	8.69	98.9	5.94322e+07	4.28093e+07	2.77913e+07	7.37562e+07	2.4526e+07	7.19169e+06
UDP-N-acetylmuramate--L-alanyl-gamma-D-glutamyl-meso-2,6-diaminoheptandioate ligase	Q1R323	yjfG	5.91	49.8	1.66901e+07	1.66458e+07	8.31752e+06	2.06456e+07	1.08597e+07	6.15393e+06
Putative transport protein	Q1RA09	UTI89_C2337	5.41	62.1	5.70356e+06	7.04699e+06	1.10133e+07	7.08826e+06	1.0209e+07	6.88703e+06
Uncharacterized protein	Q1R567	yhjS	6.76	59.3	5.86636e+06	6.85356e+06	1.27697e+07	7.26464e+06	7.31423e+06	5.64375e+06
Transport ATP-binding protein CydD	Q1RE27	cydD	6.3	65.1	9.78662e+06	1.33013e+07	1.4803e+07	1.21571e+07	1.24293e+07	8.31212e+06
Glycine betaine/L-proline transport ATP-binding protein proV	Q1R821	proV	5.57	44.1	1.86373e+07	2.98401e+07	1.90697e+07	2.30931e+07	1.56648e+07	1.46465e+07
6-phospho-beta-glucosidase BglA	Q1R7C9	bglA	5.73	55.9	2.03729e+07	2.3273e+07	1.28675e+07	2.53243e+07	7.76576e+06	2.75616e+06
RecBCD enzyme subunit RecB	Q1R7J4	recB	5.29	134.4	789501	1.07728e+06	1.05889e+06	981819	673821	166200
Malate synthase G	Q1R725	glcB	5.91	80.5	7.29377e+07	5.81478e+07	2.73492e+07	9.04035e+07	3.06357e+07	7.02308e+06
Exodeoxyribonuclease 7 large subunit	Q1R8M7	xseA	10.07	51.5	3.02252e+06	2.46448e+06	1.98195e+06	3.74266e+06	1.62573e+06	848440
AMP nucleosidase	Q1RAE8	amn	6.71	60.4	1.4226e+07	2.87805e+07	2.38798e+07	1.76581e+07	1.11653e+07	6.37909e+06
Phosphate-binding protein PstS	Q1R4K7	pstS	8.47	37	1.00415e+06	2.13137e+06	2.5393e+06	1.2463e+06	3.92349e+06	4.90799e+06
Hypothetical lipoprotein	Q1R7H8	ygdR; AL524_RS07695	4.83	7.9	6.69785e+06	2.95778e+06	4.86677e+06	8.22862e+06	1.72325e+07	1.12766e+07
VacJ lipoprotein	Q1R967	vacJ	5.05	28	2.27321e+08	3.34837e+08	3.12375e+08	2.78806e+08	3.47546e+08	3.62142e+08
Uncharacterized protein	Q1R9Y6	yegQ	6.19	51.2	1.93925e+06	2.76388e+06	1.23057e+06	2.38462e+06	1.27224e+06	0
CPA1 transporter YjcE	Q1R3K4	yjcE	5.78	60.5	2.54993e+07	2.7012e+07	3.37109e+07	3.13948e+07	3.17858e+07	2.33361e+07
Lipoprotein releasing system transmembrane protein lolE	Q1RD36	lolE	8.85	45.3	2.4896e+07	1.73188e+07	2.17517e+07	3.06525e+07	9.20298e+06	1.51737e+07
Alanine--tRNA ligase	Q1R804	alaS	5.81	95.9	3.53359e+08	3.27094e+08	2.47914e+08	4.34892e+08	2.40137e+08	1.42173e+08
Serine--tRNA ligase	Q1RE21	serS	5.5	48.4	5.25701e+07	4.78453e+07	3.39299e+07	6.46357e+07	1.93284e+07	1.29816e+07
NAD(P)H dehydrogenase (quinone)	Q1RDL3	wrbA	5.86	20.8	6.10484e+07	8.36602e+07	8.02531e+07	7.50105e+07	9.64546e+07	8.74925e+07
Acyl-[acyl-carrier-protein]--UDP-N-acetylglucosamine O-acyltransferase	Q1RG08	lpxA	7.12	28.1	5.89157e+06	6.88503e+06	8.21646e+06	7.21967e+06	8.76239e+06	7.71508e+06
Copper-transporting P-type ATPase	Q1RF48	copA	5.52	87.9	1.78078e+08	1.41741e+08	1.72615e+08	2.17724e+08	1.86972e+08	8.68858e+07
3-ketoacyl-CoA thiolase	Q1R971	fadI	8.4	46.5	2.97879e+06	671608	541631	3.61905e+06	3.08131e+06	605777
ECA polysaccharide chain length modulation protein	Q1R4F2	wzzE	6.65	39.6	4.08701e+07	4.30705e+07	4.90846e+07	4.96354e+07	4.73363e+07	4.21434e+07
UPF0194 membrane protein YbhG	Q1RED2	ybhG	5.45	36.4	1.31322e+08	1.82461e+08	1.44993e+08	1.59127e+08	1.93786e+08	1.5144e+08
Uncharacterized protein	Q1R5C4	yhiN	5.87	43.5	1.43658e+06	1.38618e+06	1.90727e+06	1.73616e+06	570662	310729
RNA polymerase-associated protein RapA	Q1RGE0	hepA	5.17	109.7	4.87439e+07	4.98327e+07	3.82015e+07	5.89779e+07	3.39858e+07	2.47443e+07
Lon protease	Q1RF96	lon	6.3	89.1	3.75139e+08	3.56725e+08	2.71219e+08	4.54394e+08	2.5579e+08	1.9952e+08
Uncharacterized protein	Q1RC40	ycjG	5.06	34.6	3.5688e+06	4.70655e+06	2.46404e+06	4.32371e+06	2.91904e+06	743422
Peptidase T	Q1RD26	pepT	5.5	44.9	4.14117e+07	3.87598e+07	3.17044e+07	4.99623e+07	2.15085e+07	1.01912e+07
Elongation factor Tu 2	Q1R5U4	tufA	5.45	43.3	3.01044e+09	3.53817e+09	2.36237e+09	3.65186e+09	2.19785e+09	1.71188e+09
Chaperone protein DnaJ	Q1RGI7	dnaJ	7.84	41	1.66446e+08	2.00852e+08	1.68351e+08	2.01598e+08	1.7554e+08	1.20552e+08
Zinc transport protein ZntB	Q1RC23	zntB	5.35	36.6	3.51391e+07	3.36187e+07	3.94992e+07	4.26255e+07	4.72513e+07	4.00786e+07
Protein RecA	Q1R801	recA	5.19	38	2.50525e+08	2.48954e+08	1.81297e+08	3.03531e+08	1.96956e+08	1.468e+08
ADP-heptose--lps heptosyltransferase II involved in lipopolysaccharide core biosynthesis	Q1R4X1	rfaF	7.55	39	3.10727e+07	2.15994e+07	2.40553e+07	3.7647e+07	2.87292e+07	2.59253e+07
Adenosine deaminase	Q1RBH5	add	5.5	36.3	1.26756e+08	7.72396e+07	5.81965e+07	1.5352e+08	9.6246e+07	6.53057e+07
CTP synthase	Q1R7R3	pyrG	5.94	60.3	1.6612e+08	1.32593e+08	7.87049e+07	2.00432e+08	9.00596e+07	3.63758e+07
Glucose dehydrogenase	Q1RG67	gcd	5.82	87.5	8.98517e+07	1.02445e+08	1.14599e+08	1.08957e+08	8.25312e+07	5.42448e+07
Chromosomal replication initiator protein DnaA	Q1R4N5	dnaA	8.66	52.5	2.08614e+07	1.91046e+07	1.47688e+07	2.5074e+07	1.92052e+07	3.00094e+07
Uncharacterized protein	Q1R848	UTI89_C3010	9.04	22.7	6.22352e+06	1.03023e+06	7.82201e+06	7.44015e+06	4.64277e+06	5.20338e+06
Na(+)/H(+) antiporter NhaA	Q1RGI2	nhaA	9.19	41.4	2.48666e+06	1.31618e+06	3108692	2.97943e+06	2.96284e+06	1.88852e+06
Lysophospholipid transporter LplT	Q1R7H6	ygeD	9.41	41.6	505713	95228.4	660689	605920	708807	666162
Hypothetical lipoprotein YedD	Q1RAL2	yedD	4.98	15.2	8.75788e+07	1.16519e+08	9.79479e+07	1.04966e+08	1.37408e+08	1.36896e+08
dTDP-4-amino-4,6-dideoxygalactose transaminase	Q1R4E6	rffA	6.19	41.9	7.42539e+06	5.81003e+06	3.15755e+06	8.93338e+06	3.08161e+06	1.08266e+06
Putative transcriptional regulator	Q1R9U7	yehV	8.73	28	3.04582e+06	1.41458e+06	1.27461e+06	3.6644e+06	629456	1.73307e+06
Adenylosuccinate lyase	Q1RD22	purB	6.01	51.5	6.34543e+07	6.77786e+07	3.08838e+07	7.58984e+07	2.90885e+07	1.70573e+07
Glutathione reductase	Q1R5B6	gor	6	48.7	3.18314e+07	3.49278e+07	2.00194e+07	3.81037e+07	1.62285e+07	6.55378e+06
Phosphate acetyltransferase	Q1R9B6	pta	5.41	77.2	1.12446e+09	8.71471e+08	4.9603e+08	1.35443e+09	6.23957e+08	3.39219e+08
Succinate dehydrogenase iron-sulfur subunit	Q1R3A4	frdB	6.52	27.1	1.80406e+08	2.10954e+08	2.12588e+08	2.15649e+08	2.80385e+08	2.53751e+08
Cytochrome d terminal oxidase, polypeptide subunit I	Q1REJ4	cydA	6.81	58.3	2.11121e+09	1.95853e+09	1.94399e+09	2.53725e+09	2.09087e+09	1.32511e+09
Maltose regulon regulatory protein MalI	Q1RBH8	malI	6.54	36.6	557058	300395	222878	660367	1.2452e+06	511980
Putative polyketide synthase	Q1RAD7	UTI89_C2209	5.4	89.5	3.22845e+06	3.15178e+06	1.04109e+06	3.8505e+06	1.37558e+06	538582
DNA topoisomerase 4 subunit B	Q1R6V3	parE	5.66	70.2	1.35603e+07	8.96413e+06	5.83138e+06	1.61995e+07	7.71433e+06	2.73814e+06
Chaperone protein HscA	Q1R8K6	hscA	5.29	67.8	1.21331e+07	1.30658e+07	9.26423e+06	1.44068e+07	7.90805e+06	1.20078e+07
Cytochrome c-type biogenesis protein CcmE	Q1R9M2	ccmE	6.8	17.7	3.63622e+06	3.78419e+06	3.42141e+06	4.32937e+06	4.40388e+06	4.15791e+06
Magnesium transport protein CorA	Q1R4B8	corA	4.73	37.1	1.74433e+07	1.71784e+07	1.31927e+07	2.08207e+07	1.98953e+07	1.36548e+07
Polysialic acid biosynthesis protein P7	Q1R747	neuC	7.59	44.2	1.43667e+08	1.57624e+08	8.21739e+07	1.71039e+08	9.97437e+07	8.71976e+07
Aspartokinase	Q1R3R4	lysC	5.11	48.5	1.47797e+07	1.35499e+07	4.33852e+06	1.76367e+07	7.68361e+06	2.08534e+06
Glutamate dehydrogenase	Q1RB31	gdhA	6.4	48.5	7.10479e+06	9.52736e+06	3.3125e+06	8.43912e+06	2.55982e+06	189851
PTS system, fructose-specific IIBC component	Q1R9Q4	fruA	8.75	57.6	5.81951e+07	5.68566e+07	7.50483e+07	6.90877e+07	7.02194e+07	3.45138e+07
Transcriptional regulatory protein RcsB	Q1R9J8	rcsB	8.32	25.4	4.52643e+07	4.68638e+07	4.50317e+07	5.37406e+07	5.77288e+07	4.41229e+07
D-ribose-binding periplasmic protein	Q1R4I1	rbsB	7.47	31.2	514409	1.34752e+06	0	605151	574336	610343
RecBCD enzyme subunit RecC	Q1R7J2	recC	4.97	128.7	9.18964e+06	7.74047e+06	5.19753e+06	1.08799e+07	4.95431e+06	2.86955e+09
Uncharacterized protein	Q1RB38	ynjB	6.14	42.9	7.98871e+06	5.96885e+06	4.55843e+06	9.44652e+06	3.25121e+06	1.94855e+06
Uncharacterized protein	Q1RC19	ynaF	6.42	18.4	4.6499e+07	2.87447e+07	1.57392e+07	5.47351e+07	5.30416e+07	2.94326e+07
DNA gyrase subunit A	Q1R9I5	gyrA	5.2	96.9	1.288e+08	1.12266e+08	6.54192e+07	1.52422e+08	6.9257e+07	3.94559e+07
tRNA modification GTPase MnmE	Q1R4M8	trmE	5.06	49.2	1.74811e+07	1.44955e+07	5.66149e+06	2.0606e+07	8.06235e+06	3.4344e+06
Multifunctional CCA protein	Q1R6S5	cca	6.65	46.5	1.97093e+06	1.79955e+06	1.58458e+06	2.31672e+06	1.89281e+06	211647
ABC transporter ATP-binding protein YjjK	Q1R250	yjjK	5.68	62.4	3.81327e+08	2.89785e+08	2.38077e+08	4.51713e+08	2.48412e+08	1.20254e+08
Carboxy-terminal protease for penicillin-binding protein 3	Q1RAV7	prc	6.35	76.7	5.50361e+07	4.35621e+07	4.03918e+07	6.49962e+07	3.19735e+07	1.9723e+07
Tol-Pal system protein TolB	Q1REI5		7.59	45.9	1.65774e+08	2.80912e+08	3.31839e+08	1.948e+08	1.95595e+08	2.02647e+08
Molybdate-binding periplasmic protein	Q1REG7	modA	7.47	27.4	3.24133e+06	5.08606e+06	5.71277e+06	3.839e+06	4.44719e+06	5.09062e+06
Porphobilinogen deaminase	Q1R4D3	hemC	5.76	34.6	1.42659e+06	475820	0	1.68011e+06	0	0
Amino acid antiporter	Q1RBT0	xasA	8.65	55.1	3.41978e+09	4.12469e+09	4.56082e+09	4.04158e+09	4.17873e+09	3.31126e+09
Uncharacterized protein	Q1R2Z8	UTI89_C4862	6.38	19.2	1.23574e+06	537450	1.08477e+06	1.44146e+06	1.14602e+06	345265
Putative outer membrane protein	Q1R544	yiaD	9.8	22.2	1.7019e+08	1.97749e+08	1.86434e+08	1.98615e+08	2.44005e+08	2.43052e+08
Putative virulence factor	Q1RD89	mviM	7.28	33.6	6.58462e+06	5.51584e+06	5.01313e+06	7.69555e+06	5.93217e+06	3.95942e+06
GTPase Obg	Q1R6F4	obgE	4.96	42.7	2.82768e+07	3.11001e+07	2.81457e+07	3.30642e+07	2.05476e+07	1.28197e+07
Efflux pump membrane transporter	Q1R589	yhiV	5.69	111.5	6.98889e+08	7.76405e+08	9.31129e+08	8.19396e+08	7.08571e+08	5.93668e+08
Oligopeptide transport ATP-binding protein OppD	Q1RCJ0	oppD	6.16	37.1	1.68766e+07	1.7436e+07	1.81675e+07	1.97263e+07	1.99574e+07	1.74608e+07
DNA polymerase III subunit gamma/tau	Q1RF66	dnaX	6.84	71.1	4.68316e+06	4.08094e+06	4.08969e+06	5.49593e+06	3.78267e+06	1.52101e+06
Protein translocase subunit SecD	Q1RFD3	secD	8.6	66.6	1.49321e+08	1.5532e+08	1.80247e+08	1.74854e+08	2.01286e+08	1.27896e+08
Anhydro-N-acetylmuramic acid kinase	Q1RBF5	anmK	6.28	39.5	5.8648e+06	7.5099e+06	588387	6.80523e+06	4.92706e+06	2.27565e+06
50S ribosomal protein L20	Q1RB79	rplT; AL524_RS16400	11.47	13.5	5.62279e+07	4.17953e+07	6.4016e+07	6.52273e+07	9.30455e+07	8.70926e+07
Uncharacterized protein	Q1R5E7	UTI89_C3988	6.58	22.1	2.18184e+08	1.91339e+08	2.36707e+08	2.54125e+08	2.97112e+08	2.67915e+08
Glucans biosynthesis glucosyltransferase H	Q1RDA9	mdoH	8.6	97.9	2.78296e+07	2.72861e+07	2.93414e+07	3.23525e+07	2.6868e+07	1.95908e+07
Protoheme IX synthesis late stage protein	Q1R4D6	hemY	8.53	45.2	1.90859e+08	2.29256e+08	1.97946e+08	2.22236e+08	2.31512e+08	2.02079e+08
Uncharacterized protein	Q1R3S6	yjbB	7.84	59.4	3.92207e+06	4.60932e+06	4.75407e+06	4.54193e+06	3.84209e+06	542919
Hexuronate transporter	Q1R6N7	exuT	8.79	51.6	1.76336e+06	2.02344e+06	1.43256e+06	2.04081e+06	913412	644385
Cation/acetate symporter ActP	Q1R3J9	actP	9.41	59.1	3.27969e+07	5.92313e+07	4.94316e+07	3.798e+07	4.95571e+07	3.78919e+07
Lipoprotein-releasing system ATP-binding protein LolD	Q1RD37	lolD	8.05	25.4	1.89823e+07	2.08052e+07	2.17401e+07	2.2028e+07	1.98965e+07	2.04844e+07
Glyceraldehyde-3-phosphate dehydrogenase	Q1RBZ8	UTI89_C1638	6.65	35.8	2.6278e+07	4.00383e+07	4.03947e+07	3.05747e+07	4.0785e+07	3.19737e+07
Acetyl CoA carboxylase, biotin carboxylase subunit	Q1R681	accC	7.11	50.8	1.08688e+08	1.23337e+08	6.0243e+07	1.26388e+08	6.40553e+07	3.28692e+07
Protein YcgS	Q1RCP0	ycgS	7.34	25.5	5.88948e+06	5.02536e+06	5.4418e+06	6.86087e+06	6.54599e+06	5.24758e+06
UDP-sugar hydrolase (5'-nucleotidase)	Q1RF55	ushA	5.63	60.8	3.1379e+06	4.59629e+06	3746385	3.64803e+06	2.456e+06	1.9055e+06
ATP-binding protein of glutamate/aspartate transport system	Q1RER6	gltL	7.49	26.6	1.10606e+07	2.75864e+07	2.22831e+07	1.2884e+07	1.915e+07	1.13783e+07
Putative electron transport protein YkgF	Q1RFN3	ykgF	8.25	53	1.28479e+07	1.54609e+07	1.23713e+07	1.47549e+07	7.50188e+06	5.18725e+06
Cell division protein FtsZ	Q1RGA0	ftsZ	4.78	40.3	2.00627e+08	2.21689e+08	1.32928e+08	2.30915e+08	1.95451e+08	1.33681e+08
Sensor protein	Q1RAH4	yedV	7.58	50.7	723952	643230	882653	833484	1.02436e+06	1.42667e+06
Uncharacterized protein	Q1R5C9	yhhJ	7.15	43.9	1.62332e+06	1.84128e+06	2.59109e+06	1.86794e+06	1.83486e+06	1.19371e+06
Sodium/glutamate symporter	Q1R4T8	UTI89_C4198	8.43	42.4	4.05477e+06	3.26865e+06	7.98801e+06	4.65439e+06	5.84128e+06	4.21482e+06
Glutamate--tRNA ligase	Q1R8W9	gltX	6.07	53.8	7.8114e+07	7.09828e+07	4.74087e+07	9.01624e+07	3.34101e+07	1.38484e+07
Tryptophanase	Q1R4M6	tnaA	6.23	53.4	7.0851e+08	8.67588e+08	4.49835e+08	8.13412e+08	3.66416e+08	1.83717e+08
Putative membrane protein	Q1R228	UTI89_P010	5.26	70.1	7.64583e+06	1.53461e+07	1.67529e+07	8.69965e+06	7.39026e+06	6.34192e+07
Sigma factor-binding protein Crl	Q1RFT0	crl	5.6	15.6	4.10186e+06	3.00149e+06	1.99952e+06	4.68569e+06	3.16442e+06	2.37972e+06
Succinate--CoA ligase [ADP-forming] subunit beta	Q1REJ8	sucC	5.52	41.4	1.00898e+09	1.01018e+09	4.51756e+08	1.14859e+09	4.92772e+08	2.77064e+08
2,3-bisphosphoglycerate-independent phosphoglycerate mutase	Q1R4X9	yibO	5.2	57.2	5.45393e+07	5.10217e+07	3.1079e+07	6.22359e+07	2.78136e+07	4.98942e+06
Riboflavin biosynthesis protein RibD	Q1RFC7	ribD	7.56	40.4	1.84688e+06	1.69406e+06	1.71831e+06	2.10902e+06	0	0
Uncharacterized protein	Q1REL6	ybgA	9.69	20.2	8.60346e+06	664274	3.558e+06	9.70867e+06	9.63555e+06	9.79333e+06
Uncharacterized protein	Q1RFG9	yaiW	9.57	40.3	5.43434e+07	5.64209e+07	6.75545e+07	6.11678e+07	7.00165e+07	7.76397e+07
Uncharacterized protein	Q1RA85	UTI89_C2261	8.05	44.7	8.24938e+06	5.81245e+06	4.51443e+06	9.35094e+06	6.02051e+06	1.81533e+06
Glucarate dehydratase related protein	Q1R7Q4	ygcY	6.32	48.9	4.4773e+06	2.15873e+06	2.27171e+06	5.06739e+06	1.54508e+06	264927
ATP-dependent clp protease ATP-binding subunit clpA	Q1RE40	clpA	6.24	84.7	7.27547e+07	6.6499e+07	3.93607e+07	8.20382e+07	5.43527e+07	2.53156e+07
RNA polymerase sigma factor RpoD	Q1R6R2	rpoD	4.81	70.2	9.45782e+07	8.05206e+07	7.05585e+07	1.0669e+08	5.2009e+07	2.41009e+07
Enolase	Q1R7R4	eno	5.48	45.6	4.22678e+08	5.46698e+08	3.95841e+08	4.75685e+08	3.02495e+08	3.04491e+08
Argininosuccinate lyase	Q1R3V1	argH	5.33	50.2	3.84e+06	1.62386e+06	622188	4.35591e+06	1.80899e+06	120903
2,3-dihydro-2,3-dihydroxybenzoate synthetase, isochroismatase	Q1REW7	entB	5.25	32.5	6.19746e+07	3.62033e+07	2.84722e+07	7.02773e+07	3.72144e+07	2.99955e+07
Primosomal protein N'	Q1R3Y2	priA	8.66	84.3	238569	366622	0	269492	0	0
DNA-directed RNA polymerase subunit beta	Q1R5V3		5.26	150.5	8.35968e+08	6.96736e+08	4.0886e+08	9.45367e+08	4.05251e+08	2.31955e+08
Transcriptional regulatory protein OmpR	Q1R5N0	ompR; EAMY_RS33245	6.39	27.3	1.9761e+08	1.99322e+08	1.15776e+08	2.23301e+08	1.62424e+08	1.08731e+08
Regulator of FtsI	Q1R689	mreB	5.48	39.5	2.85173e+08	2.94268e+08	1.6972e+08	3.1938e+08	2.32698e+08	1.63072e+08
Elongation factor G	Q1R5U3	fusA	5.38	77.5	6.82803e+08	5.57169e+08	3.4961e+08	7.64221e+08	3.61574e+08	2.03797e+08
Chaperone SurA	Q1RGE4	surA	6.98	47.3	4.00352e+07	4.64227e+07	3.0919e+07	4.50284e+07	2.28545e+07	8.5074e+06
Transcriptional activator CadC	Q1R3C6	cadC	5.63	57.8	4.9478e+06	5.18685e+06	7.73648e+06	5.52247e+06	6.62618e+06	3.64814e+06
Uncharacterized protein	Q1RF57	ybaL	5.12	59.5	6.20726e+07	7.51726e+07	6.30462e+07	6.97728e+07	6.14011e+07	5.12015e+07
Glucose-1-phosphate adenylyltransferase	Q1R5J6	glgC	6.14	48.6	2.56623e+07	3.24072e+07	2.03443e+07	2.87145e+07	1.26432e+07	6.91876e+06
Lipopolysaccharide core biosynthesis glucosyltransferase I	Q1R4W2	rfaG	7.85	42.5	7.25985e+06	4.09978e+06	8.84555e+06	8.16449e+06	6.46561e+06	4.01487e+06
PTS enzyme IIC, mannose-specific	Q1RAX3	manY	5.15	27.6	3.81184e+07	4.44999e+07	4.28947e+07	4.28501e+07	3.12705e+07	2.88753e+07
Catalase-peroxidase	Q1R3X0		5.31	79.9	3.68129e+08	3.02564e+08	1.27054e+08	4.13807e+08	1.60414e+08	6.40125e+07
Lipid A biosynthesis lauroyltransferase	Q1RDA4	htrB	9.79	38	4.71961e+07	4.36532e+07	4.85588e+07	5.30312e+07	5.56659e+07	5.8041e+07
ATP synthase subunit delta	Q1R4J8	atpH	5.02	19.3	6.96946e+07	8.06112e+07	8.89824e+07	7.82975e+07	1.38186e+08	1.1888e+08
Transcription termination factor Rho	Q1R4F5	rho	7.3	49.6	5.27087e+08	5.97206e+08	4.67365e+08	5.92089e+08	3.6771e+08	2.65914e+08
Protein VisC	Q1R7C4	visC	7.03	44.3	9.13236e+06	1.02229e+07	7.51564e+06	1.02383e+07	5.71764e+06	5.30304e+06
Uncharacterized protein	Q1RFX8	yafS	10.05	27.9	1.74126e+06	483082	1.49974e+06	1.93456e+06	3.7865e+06	2.75485e+06
Putative periplasmic protein	Q1R6J1	yraP	8.98	20	2.34531e+08	2.3244e+08	2.73169e+08	2.59355e+08	3.30466e+08	3.13738e+08
tRNA 2-selenouridine synthase	Q1RF31	ybbB	6.24	41.2	2.72691e+06	4.12443e+06	1.23558e+06	3.03973e+06	1.56828e+06	595205
Uncharacterized protein	Q1R267	yjjU	8.66	41.3	4.66252e+06	3.7162e+06	2.46311e+06	5.17008e+06	3.35214e+06	2.4359e+06
Ribosomal RNA large subunit methyltransferase H	Q1RES6	ybeA	8.66	17.3	1.54495e+06	1.38114e+06	1.43411e+06	1.71656e+06	997056	1.41049e+06
Putative transport protein	Q1R9C3	yfbS	8.59	65.8	776513	444688	94102.1	861686	699831	0
Nucleoside channel receptor of phage T6 and colicin K	Q1RFD0	tsx	6.28	35.5	3.47289e+08	3.13901e+08	3.84474e+08	3.84018e+08	4.95034e+08	5.22792e+08
2-octaprenyl-3-methyl-6-methoxy-1,4-benzoquinol hydroxylase	Q1REQ4	ubiF	7.37	42.9	1.54858e+07	1.32795e+07	1.17629e+07	1.7148e+07	1.237e+07	1.12857e+07
N-acetylmuramoyl-L-alanine amidase AmiC	Q1R7J7	amiC	9.72	48.9	3.4431e+06	5.61534e+06	6.29591e+06	3.83635e+06	5.38054e+06	3.72116e+06
3-oxoacyl-[acyl-carrier-protein] reductase	Q1RD64	fabG	7.42	25.5	1.52769e+08	1.30768e+08	7.69126e+07	1.69291e+08	1.51948e+08	9.46406e+07
Putative NAGC-like transcriptional regulator	Q1RFE8	yajF	6.24	37.5	198425	530480	205229	219855	842235	208742
Uronate isomerase	Q1R6N8	uxaC	6.14	56.3	1.28092e+08	1.23771e+08	6.17983e+07	1.4191e+08	5.44503e+07	3.2867e+07
Hydrogenase-1 large subunit	Q1RDN9	hyaB	6.07	66.3	7.15767e+09	9.58738e+09	7.81302e+09	7.96479e+09	7.63842e+09	7.52488e+09
Putative tail fiber component of prophage CP-933T	Q1RE14	UTI89_C0915	5.27	18.9	481037	502024	0	530251	715040	554175
Ribosomal RNA large subunit methyltransferase F	Q1REB8		9.19	34.2	702076	502894	215023	775476	462171	465475
Putative hydrogenase subunit	Q1R6Z8	UTI89_C3419	6.76	39.6	3.23235e+07	1.37678e+07	2.73163e+07	3.55748e+07	3.76015e+07	3.26713e+07
UPF0441 protein YgiB	Q1R6U6	ygiB	9.35	23.5	7.83869e+07	1.1785e+08	5.86969e+07	8.64995e+07	1.01726e+08	7.3668e+07
Hypothetical lipoprotein YajG	Q1RFA5	yajG	9.2	24.9	1.69312e+08	1.54025e+08	1.91246e+08	1.85598e+08	2.24636e+08	2.57568e+08
Peptidoglycan glycosyltransferase MrdB	Q1RES8	mrdB	9.29	40.5	1.73304e+06	1.24468e+06	1.91164e+06	1.91393e+06	1.93189e+06	1.85677e+06
Putative peptide synthetase	Q1RAD2	UTI89_C2214	6.67	242.7	2.20569e+06	2.03894e+06	2.07149e+06	2.42736e+06	470183	2.90266e+06
Cys-tRNA(Pro)/Cys-tRNA(Cys) deacylase	Q1RF52	ybaK	9.04	17.1	5.15253e+06	5.20469e+06	2.78682e+06	5.67403e+06	3.95792e+06	3.18719e+06
Membrane-bound lytic murein transglycosylase C	Q1R762		9.33	40.1	8.26651e+06	1.28171e+07	1.2545e+07	9.06063e+06	1.10033e+07	1.27681e+07
Tryptophan synthase alpha chain	Q1RCA7	trpA	5.34	28.7	1.67183e+06	2.30438e+06	1.58842e+06	1.83797e+06	2.0531e+06	743616
Fructose-1,6-bisphosphatase	Q1R3Z3	glpX	5.5	35.8	3.1261e+07	3.75325e+07	1.71018e+07	3.45322e+07	1.85788e+07	1.45374e+07
2-amino-3-ketobutyrate coenzyme A ligase	Q1R4X3	kbl	5.97	43.1	1.70723e+08	1.51766e+08	9.02541e+07	1.8846e+08	1.05197e+08	7.41473e+07
Methionine synthase	Q1R3S9	metH	5.06	136.1	1.71319e+07	1.35523e+07	7.44486e+06	1.88231e+07	9.50364e+06	9.0947e+06
Probable septum site-determining protein MinC	Q1RCS1	minC	7.53	25.3	1.95533e+06	1.72719e+06	2.78581e+06	2.13896e+06	2.1966e+06	1.7091e+06
Protein Syd	Q1R7P9	syd	5.01	20.7	1.84447e+06	1.34951e+06	577651	2.01896e+06	0	674992
Anaerobic nitric oxide reductase transcription regulator NorR	Q1R7Z1	ygaA	5.94	55.2	966597	2.24767e+06	2.43212e+06	1.05208e+06	1.24991e+06	237438
Hypothetical lipoprotein YhiU	Q1R590	yhiU	5.91	41.1	8.92533e+08	1.13015e+09	9.60551e+08	9.70146e+08	8.27062e+08	6.14888e+08
Maltose transport system permease protein MalF	Q1R3Q3	malF	8.72	57.6	4.25807e+06	4.68052e+06	6983640	4.62085e+06	5.31651e+06	3.94111e+06
ATP-binding component of histidine transport	Q1R9A7	hisP	7.69	28.6	5.57989e+06	5.86848e+06	7.08626e+06	6.06409e+06	5.68039e+06	5.69656e+06
UDP-N-acetylmuramoylalanine--D-glutamate ligase	Q1RGA7	murD	5.31	46.9	2.84517e+07	2.54736e+07	1.04525e+07	3.11126e+07	1.47729e+07	7.17726e+06
2-amino-4-hydroxy-6-hydroxymethyldihydropteridine pyrophosphokinase	Q1RG48	folK	5.3	17.8	2.10858e+06	781156	1.09503e+06	2.3035e+06	771692	649109
Succinate dehydrogenase iron-sulfur subunit	Q1REK1	sdhB	6.73	26.8	7.85146e+08	7.87698e+08	9.40117e+08	8.58472e+08	1.05549e+09	8.68509e+08
Beta sliding clamp	Q1R4N6	dnaN	5.39	40.6	6.78226e+06	8.39647e+06	6.65089e+06	7.37914e+06	5.73608e+06	2.2007e+06
Putative resistance protein	Q1R775	yggT	9.48	21.2	1.0145e+07	6.30288e+06	9.28339e+06	1.09923e+07	1.65673e+07	1.15758e+07
Prolipoprotein diacylglyceryl transferase	Q1R7I5	lgt	9.52	33.1	7.601e+06	3.42393e+06	7.12409e+06	8.17965e+06	9.06794e+06	1.02854e+07
Ribosome-recycling factor	Q1RG17	frr	6.89	20.6	8.57295e+06	1.01295e+07	6.93327e+06	9.251e+06	6.35499e+06	7.89339e+06
Uncharacterized protein	Q1R2G6	yjiM	5.36	43.6	1.38324e+06	1.99532e+06	462247	1.49826e+06	1.19727e+06	0
Hypothetical oxidoreductase YeiQ	Q1R9P7	yeiQ	6.29	54.3	6.77448e+06	6.43416e+06	4.9292e+06	7.3239e+06	3.1121e+06	593041
Putative NAD(P)-linked reductase	Q1R7H7	tas	6.76	38.5	5.47331e+07	3.31709e+07	1.59547e+07	5.92033e+07	2.31046e+07	1.13697e+07
Arabinose 5-phosphate isomerase	Q1R7Z2	gutQ	6.46	34	1.18175e+07	1.08632e+07	6.66141e+06	1.27827e+07	5.84791e+06	7.54186e+06
Uncharacterized Nudix hydrolase NudL	Q1RAX9	yeaB	6.28	21.5	1.42034e+07	1.16039e+07	4.69659e+06	1.5298e+07	8.35109e+06	6.20112e+06
Putative oxidoreductase YhhX	Q1R5I7	yhhX	6.48	38.7	4.20376e+07	3.61744e+07	1.30228e+07	4.53041e+07	1.22466e+07	2.45613e+06
Ribonuclease I	Q1REV1	rna	8.43	30.3	1.75699e+06	2.4422e+06	2.05032e+06	1.889e+06	1.98213e+06	2.00135e+06
Uncharacterized protein	Q1R8Y5	ypdB	5.8	29.5	7.26932e+06	6.31258e+06	3.70524e+06	7.81649e+06	6.10548e+06	3.37965e+06
Galactoside transport system permease protein mglC	Q1R9S5	mglC	9.01	35.6	2.04791e+06	2.4726e+06	3.07526e+06	2.20989e+06	2.36652e+06	1.58279e+06
Lipid-A-disaccharide synthase	Q1RG07	lpxB	7.44	42.3	9.8236e+06	7.86513e+06	7.86304e+06	1.06469e+07	1.02702e+07	4.64288e+06
Lipopolysaccharide heptosyltransferase-1	Q1R4X0	rfaC	8.97	36.2	6.48049e+06	4.58561e+06	4.62919e+06	7.0177e+06	7.34798e+06	5.82438e+06
Inosine-guanosine kinase	Q1RF58	gsk	5.78	48.4	9.12933e+06	8.1876e+06	2.48308e+06	9.87516e+06	4.75967e+06	1.48186e+06
50S ribosomal protein L10	Q1R5V0	rplJ	8.98	17.7	4.37705e+08	5.6366e+08	4.4476e+08	4.73145e+08	6.61546e+08	6.18036e+08
1-deoxy-D-xylulose-5-phosphate synthase	Q1RFC0	dxs	6.62	67.6	2.5693e+07	1.91759e+07	1.24092e+07	2.76954e+07	1.63413e+07	5.85758e+06
Uncharacterized protein	Q1RCG2	UTI89_C1472	5.68	38.2	1.48234e+07	1.5586e+07	1.06318e+07	1.59169e+07	1.38183e+07	8.71581e+06
Prophage CP-933T putative stability/partitioning protein	Q1RDY1	UTI89_C0948	6.23	34.9	3.4798e+06	1.68018e+06	1.72993e+06	3.71686e+06	2.15269e+06	1.41906e+06
Phosphate transporter	Q1R5C3	pitA	9.51	53.4	3.55119e+07	3.2199e+07	4.17507e+07	3.80282e+07	3.53885e+07	2.21671e+07
Putative transport protein YidE	Q1R4Q2		8.76	58.9	2.52002e+06	3.64774e+06	4.36906e+06	2.69105e+06	3.33886e+06	2.3698e+06
L-arabinose-binding periplasmic protein	Q1RAN7	araF	8.02	37.5	4.72783e+06	6.71983e+06	2.38597e+06	5.06221e+06	2.50326e+06	3.71891e+06
Phosphoglucomutase	Q1REM8	pgm	6	60.3	2.40969e+07	1.77969e+07	1.51631e+07	2.58888e+07	1.16638e+07	5.1834e+06
Probable oxidoreductase YdfG	Q1RBM4	ydfG	6	27.8	2.19487e+07	1.25075e+07	12544807	2.35137e+07	1.38198e+07	1.79067e+07
Glutamate decarboxylase	Q1RBS9	gadB	5.99	55.4	1.32199e+10	1.42866e+10	7.81983e+09	1.41491e+10	5.77677e+09	2.93106e+09
GMP reductase	Q1RG92	guaC	6.54	37.4	3.32937e+07	4.57853e+07	2.56926e+07	3.56071e+07	3.46805e+07	3.78417e+07
Putative metal resistance protein	Q1RF37	ybbM	9.67	29.2	7.571e+06	7.69004e+06	9.71899e+06	8.01631e+06	9.14777e+06	6.71146e+06
Putative DNase	Q1RED7	ybhP	7.11	28.8	6.45489e+06	4.67654e+06	6.83667e+06	6.86048e+06	7.31404e+06	7.559e+06
Uncharacterized protein	Q1RFV2	UTI89_C0259	6.73	29.4	1.41013e+06	531984	0	1.48844e+06	0	0
Outer membrane protein assembly factor BamB	Q1R8M1	yfgL	4.91	41.9	4.22693e+08	3.97819e+08	5.77659e+08	4.47612e+08	5.4383e+08	6.35033e+08
Xaa-Pro aminopeptidase	Q1R7C2	pepP	5.39	49.7	5.82969e+07	4.28805e+07	2.71271e+07	6.15652e+07	2.31307e+07	7.38301e+06
Uncharacterized protein	Q1R398	yjeP	6.89	123.9	6.30454e+06	5.0651e+06	5.37317e+06	6.69803e+06	3.91133e+06	2.59436e+06
Aconitate hydratase	Q1RC89	acnA	5.82	97.7	6.71275e+08	4.41912e+08	1.84802e+08	7.14429e+08	2.2435e+08	1.42323e+08
NADH-quinone oxidoreductase subunit B	Q1R9D0	UTI89_C2567	5.74	25	3.468e+08	3.81835e+08	3.91714e+08	3.67502e+08	4.67119e+08	3.66175e+08
dTDP-glucose 4,6-dehydratase	Q1RA34	rfbB	5.76	40.5	6.84107e+07	7.33247e+07	3.47999e+07	7.27174e+07	2.83975e+07	1.51583e+07
Putative conserved protein	Q1R3I2	UTI89_C4674	7.27	57.1	2.07977e+07	1.86801e+07	1.17937e+07	2.21495e+07	1.03226e+07	3.3996e+06
GltJ, subunit of glutamate ABC transporter	Q1RER4	gltJ	8.87	27.6	1.9653e+06	3.09426e+06	2.82546e+06	2.0858e+06	2.97373e+06	1.25357e+06
2-succinyl-5-enolpyruvyl-6-hydroxy-3-cyclohexene-1-carboxylate synthase	Q1R9E9		6.74	61.4	7.6119e+06	3.16819e+06	2.12836e+06	8.04741e+06	3.67786e+06	1.45867e+06
Uncharacterized protein	Q1RC00	ydcF	5.73	29.6	3.78051e+06	1.0776e+06	425675	3.97902e+06	995485	1.3634e+06
Acetyltransferase	Q1R4Y8	cysE	6.52	29.3	3.24258e+06	3.89305e+06	0	3.4096e+06	3.52199e+06	2.90279e+06
Holliday junction ATP-dependent DNA helicase RuvB	Q1RAS4	ruvB	5.16	37.2	1.85559e+06	1.27031e+06	0	1.94668e+06	846596	541215
Transcription antitermination protein NusB	Q1RFC4	nusB	7.18	15.7	1.21382e+07	6.56843e+06	1.27211e+07	1.27593e+07	2.54765e+07	2.41978e+07
Uncharacterized protein	Q1R8I0	yfhG	6.15	27.5	2.21605e+07	2.93544e+07	3.2085e+07	2.31676e+07	3.4765e+07	3.11291e+07
Putative membrane protein	Q1R226	UTI89_P012	8.18	51	1.86112e+07	1.49461e+07	2.9345e+07	1.94909e+07	1.70301e+07	2.00056e+07
Ribosomal RNA small subunit methyltransferase I	Q1R6J5	yraL	6.09	31.5	3.0844e+06	2.83422e+06	1.0255e+06	3.22411e+06	2.93292e+06	653014
Ribosomal protein S12 methylthiotransferase RimO	Q1RE90	rimO	5.63	49.5	8.04963e+06	8.37483e+06	5.77538e+06	8.44968e+06	5.44742e+06	1.3309e+06
Putative ATP-binding component of a transport system	Q1RF38	ybbL	5.27	25.4	7.43259e+06	6.79284e+06	5.22021e+06	7.81001e+06	6.65847e+06	4.55516e+06
Inner membrane serine protease DegS	Q1R6A4	degS	5.67	37.6	3.86783e+07	3.79082e+07	3.73217e+07	4.06566e+07	4.84632e+07	4.16453e+07
Hypothetical lipoprotein YfhM	Q1R8L2	yfhM	5.44	181.3	4.65241e+07	3.74162e+07	3.49343e+07	4.88298e+07	4.37128e+07	2.98801e+07
Outer membrane lipoprotein Blc	Q1R3A8	blc	8.41	19.9	1.42721e+08	1.13951e+08	1.47861e+08	1.49648e+08	1.83983e+08	1.91842e+08
High-affinity transport system for glycine betaine and proline	Q1R820	proW	8.84	37.5	9.01758e+06	1.0541e+07	7.7735e+06	9.44621e+06	9.47951e+06	1.01665e+07
Zinc import ATP-binding protein ZnuC	Q1RAS6	znuC	9.33	27.9	1.78893e+06	2.67667e+06	1.13584e+06	1.87574e+06	1.75135e+06	1.83842e+06
Leucine--tRNA ligase	Q1RER9		5.3	97.2	8.21497e+07	9.81826e+07	4.10233e+07	8.66399e+07	3.50048e+07	2.27135e+07
Tyrosine--tRNA ligase	Q1RBF8	tyrS	5.68	48	8.54013e+07	7.04053e+07	3.83e+07	8.92645e+07	4.86867e+07	1.80362e+07
Shikimate kinase 1	Q1R5P7	aroK	5.77	27	3.7525e+06	2.8422e+06	1.40514e+06	3.95531e+06	964917	1.34663e+06
Amidophosphoribosyltransferase	Q1R9A1	purF	5.52	56.5	1.41183e+06	1.68224e+06	1.94738e+06	1.47551e+06	426241	0
Fumarate hydratase class I	Q1RBI6	fumA	6.55	60.3	1.21257e+08	1.00015e+08	5.81339e+07	1.27723e+08	5.15761e+07	1.94064e+07
Aminotransferase	Q1R3M7	tyrB	5.99	45.3	1.39078e+07	4.84328e+06	1.86441e+06	1.459e+07	4.42668e+06	1.43702e+06
Dihydrofolate synthase/folylpolyglutamate synthase	Q1R997	folC	5.8	45.4	1.30884e+07	1.09126e+07	4.11156e+06	1.37515e+07	8.09653e+06	3.04412e+06
DNA polymerase III, delta subunit	Q1RES1	holA	6.99	38.7	2.19839e+06	1.46511e+06	957369	2.31863e+06	1.9189e+06	1.37169e+06
Uncharacterized protein	Q1RB41	ydjY	8.27	30.4	3.534e+07	2.96929e+07	3.54091e+07	3.67793e+07	4.59789e+07	3.99036e+07
Uncharacterized protein	Q1R834	ygaP	7.39	18.7	1.61462e+07	1.63682e+07	1.24759e+07	1.67966e+07	1.93347e+07	9.65385e+06
Uncharacterized protein	Q1R2R4	UTI89_C4947	7.42	64.8	2.32284e+06	5.42193e+06	1.23281e+07	2.40586e+06	4.27254e+06	1.16169e+06
Possible protease SohB	Q1RC96	sohB	9.23	39.4	6.05607e+07	4.19356e+07	5.05569e+07	6.27621e+07	5.90936e+07	7.24362e+07
Multidrug resistance protein MdtK	Q1RBD2	ydhE	9.69	49.4	2.83807e+06	2.93772e+06	4.3325e+06	2.95144e+06	3.56608e+06	2.55362e+06
Outer-membrane lipoprotein LolB	Q1RCM9	lolB	8.88	25.8	1.66101e+08	1.94217e+08	2.39756e+08	1.72666e+08	2.65163e+08	2.57336e+08
Ferrienterobactin-binding periplasmic protein	Q1REX0	fepB	6.14	34.3	5.89284e+06	3.39086e+06	1.75165e+06	6.13577e+06	2.13675e+06	2.78525e+06
Cell division membrane protein	Q1R5F8	ftsX	8.63	39.5	3.19227e+07	3.12576e+07	2.93345e+07	3.32813e+07	3.72305e+07	3.43534e+07
Putative ATP-binding component of a transport system	Q1R6D9	yrbF	6.64	29.1	2.53354e+07	2.23532e+07	2.4176e+07	2.64725e+07	2.80015e+07	2.64607e+07
4-hydroxy-3-methylbut-2-en-1-yl diphosphate synthase (flavodoxin)	Q1R8L8	ispG	6.21	40.7	7.25923e+07	6.54706e+07	2.1961e+07	7.53476e+07	4.04626e+07	2.01368e+07
Glutamate-1-semialdehyde 2,1-aminomutase	Q1RG34	hemL	4.91	45.4	7.5976e+07	8.90844e+07	3.78158e+07	7.90764e+07	3.99895e+07	2.19317e+07
ATP synthase subunit b	Q1R4J6	atpF	6.24	17.3	7.88011e+08	7.25991e+08	6.86471e+08	8.15614e+08	8.27794e+08	8.15469e+08
NAD kinase	Q1R8A9	ppnK	6.79	32.6	644825	0	0	673515	0	0
PTS system, glucose-specific IIA component	Q1R8V3	crr	4.84	18.2	3.64311e+07	3.01597e+07	3.94941e+07	3.80589e+07	5.44233e+07	5.39577e+07
Outer membrane lipoprotein RcsF	Q1RFZ2	rcsF	9.13	14.2	1.01848e+08	1.1293e+08	1.15449e+08	1.0571e+08	1.41561e+08	1.55193e+08
Chorismate synthase	Q1R983		6.38	39.1	1.31247e+06	1.54754e+06	599949	1.35485e+06	2.95262e+06	2.83782e+06
Osmotically inducible protein Y	Q1R269	osmY	8.05	24.1	1.11508e+07	1.40983e+07	1.87476e+07	1.14619e+07	7.72094e+06	1.67323e+07
Uncharacterized protein	Q1RBQ0	UTI89_C1736	9.1	42.2	8.17294e+06	7.19796e+06	8124791	8.42563e+06	7.32923e+06	4.65943e+06
Uncharacterized protein	Q1RD94	yceB	5.94	22.6	2.52826e+07	3.34452e+07	2.4354e+07	2.59151e+07	3.06747e+07	2.83557e+07
HTH-type transcriptional regulator SgrR	Q1RGC7		6.87	64	393673	391919	392752	406285	0	0
RNA polymerase sigma factor RpoS	Q1R7V1	rpoS	5.03	39.3	5.10236e+06	6.10621e+06	7.00754e+06	5.23986e+06	2.9369e+06	1.40984e+06
Ferritin	Q1RAN2	ftnA	4.83	20	6.13781e+07	4.34788e+07	4.23861e+07	6.31235e+07	8.5127e+07	6.24242e+07
Lipoprotein NlpI	Q1R6H6	nlpI	4.74	33.6	6.00743e+07	4.3537e+07	5.48665e+07	6.16485e+07	7.68275e+07	6.43597e+07
Hypothetical transport protein YbaT	Q1RF46	ybaT	8.69	45.6	2.93213e+07	2.67785e+07	4.63903e+07	3.01259e+07	3.96295e+07	3.87641e+07
Putative transport protein YbjL	Q1RE78	ybjL	8.34	60.3	5.39685e+06	5.50775e+06	4.58982e+06	5.58041e+06	4.26735e+06	4.46991e+06
PTS system, glucose-specific IIBC component	Q1RD54	UTI89_C1228	8.65	50.6	7.93219e+07	9.38261e+07	1.13848e+08	8.19219e+07	7.50176e+07	6.17198e+07
Lipopolysaccharide core biosynthesis glycosyl transferase rfaQ	Q1R4W1	rfaQ	8.87	39.5	7.89573e+06	5.1577e+06	2.51811e+06	8.1463e+06	4.81391e+06	3.63412e+06
Bifunctional protein GlmU	Q1R4K5	glmU	6.54	49.2	4.67002e+07	3.30203e+07	1.47513e+07	4.82616e+07	2.18725e+07	7.87917e+06
Penicillin-binding protein 6	Q1RE86	dacC	8.03	44.5	8.60201e+08	7.90764e+08	9.58192e+08	8.84715e+08	1.00512e+09	9.6862e+08
Coproporphyrinogen-III oxidase	Q1R446	hemN	5.86	52.9	1.11131e+07	9.28397e+06	2.51184e+06	1.14891e+07	4.90434e+06	796288
Guanosine-3',5'-bis(Diphosphate) 3'-pyrophosphohydrolase	Q1R4U1	spoT	8.73	79.3	1.12574e+07	1.07336e+07	7.2347e+06	1.16356e+07	6.07406e+06	3.1455e+06
Phosphoribosylamine--glycine ligase	Q1R5X0	purD	5.01	45.9	1.63934e+06	1.53083e+06	1.38343e+06	1.68038e+06	668467	615996
Regulatory protein SdiA	Q1RAM4	sdiA	6.7	28.6	462643	392418	0	477886	242179	0
D-alanine--D-alanine ligase	Q1RGA3	ddl	4.84	32.9	7.14442e+06	5.11892e+06	1.9769e+06	7.32772e+06	3.52709e+06	1.338e+06
Large-conductance mechanosensitive channel	Q1R642	mscL	7.25	15.1	2.60368e+07	1.24295e+07	1.66504e+07	2.64635e+07	5.77075e+07	4.12111e+07
UPF0234 protein YajQ	Q1RFB4		6.24	18.3	1.43082e+07	9.04564e+06	1.55305e+07	1.46101e+07	1.30564e+07	1.21099e+07
Uncharacterized protein	Q1R8B4	ypjD	8.85	32.1	595546	173500	363136	605335	215597	0
Putative sulfatase YdeN	Q1RBS4	ydeN	6.28	64.1	2.72136e+07	2.10272e+07	1.21986e+07	2.78151e+07	1.09853e+07	1.32658e+06
Uncharacterized protein	Q1RAR7	yecD	5.81	21	414127	392056	0	420565	0	0
Uncharacterized protein	Q1R6I9	yraR	8.51	23.2	9.11158e+07	9.79237e+07	1.12347e+08	9.28475e+07	1.16745e+08	1.06149e+08
Regulator of plasmid McrB operon	Q1R814	mprA	6.21	20.6	1.7242e+07	1.32774e+07	8.86499e+06	1.76494e+07	1.48664e+07	1.13864e+07
High-affinity choline transport protein	Q1RFM0	betT	6.92	75.8	5.2833e+06	6.73283e+06	1.30866e+07	5.39447e+06	6.55824e+06	4.59497e+06
TonB-dependent enterochelin uptake protein	Q1R6Z1	exbB	8.16	26.3	2.5364e+07	2.32286e+07	2.50757e+07	2.58727e+07	3.43043e+07	2.40204e+07
Cysteine--tRNA ligase	Q1RF08	cysS	5.57	52.2	5.25877e+06	3.30805e+06	5.15492e+06	5.3403e+06	4.37123e+06	7.48076e+06
Copper homeostasis protein CutF	Q1RFZ6	cutF	5.01	25.8	7.0381e+07	6.94053e+07	7.60622e+07	7.20045e+07	8.95306e+07	9.15839e+07
50S ribosomal protein L2	Q1R607	rplB; CSK29544_RS06430; AL524_RS00875	10.93	29.8	6.33151e+08	8.7204e+08	7.2286e+08	6.45968e+08	1.11991e+09	1.21418e+09
Peptidyl-prolyl cis-trans isomerase	Q1R5R9	ppiA	8.85	20.4	4.72941e+06	1.10207e+06	6.25299e+06	4.75507e+06	3.14996e+06	2.09734e+06
Hypothetical lipoprotein YajI	Q1RFC9	yajI	8.76	21.8	1.66862e+07	2.09895e+07	2.02732e+07	1.68678e+07	1.8854e+07	1.88292e+07
UPF0259 membrane protein YciC	Q1RCH9	yciC	9.99	26.4	3.95758e+06	3.82182e+06	4.37759e+06	4.00844e+06	5.05336e+06	3.46061e+06
2,5-diketo-D-gluconic acid reductase A	Q1RFP3	UTI89_C0320	5.68	31.9	2.87291e+07	2.5402e+07	1.02893e+07	2.8972e+07	1.14855e+07	7.09441e+06
Hypothetical oxidoreductase YciK	Q1RC97	yciK	7.3	27.9	5.77039e+07	3.50068e+07	3.67571e+07	5.85245e+07	4.08195e+07	2.76904e+07
Cyclopropane fatty acyl phospholipid synthase	Q1RBD4	cfa	6.05	43.9	1.57646e+08	1.15371e+08	8.81477e+07	1.59114e+08	1.16759e+08	7.94804e+07
HsdS, type I site-specific deoxyribonuclease	Q1R2G1	hsdS	8.68	50	7.92175e+06	2.86974e+06	704945	8.01328e+06	3.35596e+06	162312
Epoxyqueuosine reductase	Q1R394	yjeS	7.01	44.7	559279	363237	0	566460	0	0
Protein YeeZ	Q1RA57	UTI89_C2289	5.47	29.7	8.70626e+07	6.18482e+07	4.48207e+07	8.82388e+07	6.70984e+07	4.90252e+07
Shikimate dehydrogenase (NADP(+))	Q1R651	aroE	5.96	29.4	7.03358e+06	2.69243e+06	1.80226e+06	7.10841e+06	3.63269e+06	137772
Phosphofructokinase	Q1RB72	pfkB	5.36	32.6	2.46572e+07	3.41379e+07	1.13853e+07	2.49222e+07	1.73885e+07	2.03289e+07
S-ribosylhomocysteine lyase	Q1R809	luxS	5.36	19.4	7.98187e+06	7.4362e+06	1.36689e+07	8.04954e+06	6.94023e+06	9.06601e+06
Mannitol-1-phosphate 5-dehydrogenase	Q1R4Z8	mtlD	6.3	47.6	1.13522e+07	1.21854e+07	4.63821e+06	1.14122e+07	7.64782e+06	2.48451e+06
D-serine dehydratase 1	Q1R901	dsdA	5.88	47.8	5.68065e+07	5.21564e+07	2.7347e+07	5.74509e+07	2.36694e+07	7.6871e+06
Phosphoenolpyruvate carboxykinase (ATP)	Q1R5N2	pckA	6.06	62.4	2.80447e+08	2.15511e+08	1.08375e+08	2.83493e+08	9.64916e+07	2.67581e+07
Adenylosuccinate synthetase	Q1R383	purA	5.49	47.3	1.79928e+08	1.70817e+08	9.04287e+07	1.80906e+08	8.47182e+07	5.44484e+07
Trehalose 6-phosphate phosphatase	Q1RAP0	otsB	6.44	31.5	3.76715e+07	2.34322e+07	1.67435e+07	3.78854e+07	2.47953e+07	1.87991e+07
Small ribosomal subunit biogenesis GTPase RsgA	Q1R396	yjeQ	5.82	40.5	6.63418e+06	5.01137e+06	2.61075e+06	6.68279e+06	2.1918e+06	1.00113e+06
NH(3)-dependent NAD(+) synthetase	Q1RB54	nadE	5.44	30.7	7.55086e+07	5.11545e+07	2.82581e+07	7.59111e+07	3.84021e+07	3.10408e+07
Putative aminotransferase	Q1R9C5	UTI89_C2572	6.25	45.5	1.30454e+07	1.46201e+07	7.8106e+06	1.31231e+07	5.77651e+06	3.85915e+06
Putative conserved protein	Q1R495	UTI89_C4402	6.95	33.8	599025	638842	237882	600503	623215	484371
Phosphatase NudJ	Q1RD19	ymfB	5.14	17.4	3.71044e+06	3.76709e+06	0	3.72628e+06	633415	0
Ribosome-binding ATPase YchF	Q1RCN5	ychF	4.96	39.6	5.57722e+07	6.12892e+07	2.00828e+07	5.60389e+07	2.08605e+07	6.58253e+06
Glyoxylate/hydroxypyruvate reductase B	Q1R543		5.71	35.4	5.34532e+07	3.30455e+07	1.54209e+07	5.35198e+07	2.0524e+07	1.24826e+07
Glutamate/aspartate periplasmic binding protein	Q1RER3	ybeJ	8.51	35.9	1.13582e+07	1.7965e+07	2.24621e+07	1.13967e+07	1.38414e+07	3.11913e+07
TDP-N-acetylfucosamine:lipid II N-acetylfucosaminyltransferase	Q1R4E3	UTI89_C4350	7.84	40.5	7.27721e+06	6.48194e+06	8.40024e+06	7.26476e+06	1.00867e+07	1.01242e+07
Protein CsiD	Q1R844	ygaT	6.24	37.4	1.94834e+07	1.2543e+07	10017204	1.94661e+07	1.16261e+07	9.51039e+06
Putative acyl-CoA dehydrogenase	Q1R373	aidB	7.66	61.2	4.60039e+07	4.88514e+07	4.28508e+07	4.57807e+07	3.36889e+07	1.98869e+07
Glycine dehydrogenase (decarboxylating)	Q1R7C8	gcvP	6	104.3	2.09931e+07	1.72236e+07	7.75364e+06	2.09364e+07	8.78056e+06	2.22934e+06
UDP-N-acetylglucosamine--N-acetylmuramyl-(pentapeptide) pyrophosphoryl-undecaprenol N-acetylglucosamine transferase	Q1RGA5	murG	9.73	37.8	7.62509e+07	4.54782e+07	6.08205e+07	7.59411e+07	7.25105e+07	7.76734e+07
Bacterioferritin	Q1R5Y6	bfr	4.81	18.5	3.87252e+07	2.91908e+07	5.16693e+07	3.85201e+07	6.72099e+07	5.42782e+07
Component of SufB-SufC-SufD cysteine desulfurase (SufS) activator complex	Q1RBB5	sufD	6.86	46.7	4.67587e+06	2.81421e+06	1.93588e+06	4.6334e+06	2.82278e+06	239542
Uncharacterized protein	Q1R2F4	yjiY	8.79	77.9	1.38895e+07	2.14717e+07	2.19927e+07	1.38145e+07	1.28329e+07	9.1223e+06
Endolytic peptidoglycan transglycosylase RlpA	Q1RES9	rlpA	5.73	37.6	7.16972e+07	7.59789e+07	7.5508e+07	7.08749e+07	8.00602e+07	6.24363e+07
Conserved protein YdjA	Q1RB28	ydjA	7.34	20.7	2.09517e+07	2.05635e+07	1.2795e+07	2.07674e+07	1.39242e+07	1.17221e+07
Membrane-bound lytic murein transglycosylase A	Q1R7M6	mltA	9.35	53.5	5.02428e+07	4.43931e+07	5.09221e+07	4.9751e+07	6.54239e+07	6.07773e+07
Na(+)-translocating NADH-quinone reductase subunit C	Q1R229	UTI89_P009	8.51	28.4	4.20205e+07	5.15195e+07	3.392e+07	4.14764e+07	4.54009e+07	3.5999e+07
HTH-type transcriptional repressor NsrR	Q1R382	yjeB	7.87	15.6	854532	611819	0	845111	1.07831e+06	0
Outer membrane protein assembly factor BamD	Q1R8D0	UTI89_C2928	6.6	27.8	4.0815e+08	5.20802e+08	5.18793e+08	4.05682e+08	6.1113e+08	5.45353e+08
Peptide transport system ATP-binding protein sapF	Q1RC69	sapF	9.33	30.6	9.6279e+06	5.22077e+06	5.94494e+06	9.51652e+06	7.86923e+06	9.06419e+06
Histidinol-phosphate aminotransferase	Q1RA52	hisC	5.02	39.3	1.28167e+07	9.15747e+06	2.2792e+06	1.26663e+07	4.14903e+06	1.75954e+06
Phosphopentomutase	Q1R260	deoB	5.35	44.4	9.87337e+07	8.10501e+07	3.49059e+07	9.77014e+07	5.03142e+07	1.72867e+07
NrdD subunit of ribonucleoside-triphosphate reductase and anaerobic nucleoside-triphosphate reductase activating system	Q1R318	nrdD	6.83	80	1.76766e+07	1.20783e+07	4.49537e+06	1.75222e+07	8.04851e+06	2.0817e+06
30S ribosomal protein S3	Q1R612	rpsC; APT61_RS02090; GLAD_RS12870; ENT638_RS23520	10.27	26	1.37668e+09	1.26981e+09	8.66867e+08	1.35755e+09	1.06456e+09	7.66636e+08
Uncharacterized protein	Q1RG64	yadG	8.44	34.7	3.47442e+07	2.01115e+07	2.50154e+07	3.4172e+07	4.13126e+07	4.56642e+07
Uncharacterized protein	Q1RC25	ydaL	9.13	21.5	343015	568469	577547	335455	0	130691
Uncharacterized protein	Q1R6N1	yqjE	7.59	15.1	5.24086e+07	3.92587e+07	4.05218e+07	5.12542e+07	6.00751e+07	5.03979e+07
Putative transporter	Q1R9T1	yohK	9.22	24.5	858826	681626	0	841729	1.00687e+06	0
Cell division protein DamX	Q1R5P9	damX	6.04	46	1.33448e+08	1.10907e+08	1.15074e+08	1.30272e+08	1.47758e+08	5.50053e+07
Outer membrane protein assembly factor BamC	Q1R8Q0	nlpB	5.76	37	3.63291e+08	3.72837e+08	4.15301e+08	3.55778e+08	4.55328e+08	4.67521e+08
7-alpha-hydroxysteroid dehydrogenase	Q1RBH9	hdhA	5.59	26.7	1.01748e+07	7.83982e+06	5.93514e+06	1.00104e+07	7.52383e+06	6.76144e+06
Uncharacterized protein	Q1R5T7	yheO	5.66	27.4	1.46284e+07	7.76931e+06	4.44109e+06	1.42807e+07	4.22438e+06	4.37117e+06
CycA serine/alanine/glycine APC transporter	Q1R343	cycA	8.85	51.6	8.21397e+06	8.22844e+06	1.02456e+07	8.06238e+06	1.08432e+07	5.25783e+06
H(+)/Cl(-) exchange transporter ClcA	Q1RG33	yadQ	9.5	50.4	1.39885e+07	1.39432e+07	1.0279e+07	1.37552e+07	1.00906e+07	8.90437e+06
Uncharacterized protein	Q1R6E1	yrbD	4.86	20.1	6.29665e+07	4.89054e+07	6.05482e+07	6.17828e+07	5.4782e+07	6.62685e+07
Methionine import ATP-binding protein MetN	Q1RFY9	metN	6.38	37.8	1.69482e+07	1.34086e+07	1.49914e+07	1.65475e+07	1.49169e+07	1.4289e+07
Aspartate ammonia-lyase	Q1R3C1	aspA	5.76	54	9.05927e+08	8.84154e+08	4.75842e+08	8.84367e+08	3.62643e+08	1.89964e+08
Ribulose-phosphate 3-epimerase	Q1R5Q1	rpe	5.31	24.5	1.31524e+06	1.38265e+06	907134	1.29491e+06	1.3784e+06	1.2738e+06
3-phosphoshikimate 1-carboxyvinyltransferase	Q1RDV0	aroA	5.87	46.2	4.05402e+06	2.91483e+06	665588	3.95588e+06	2.40242e+06	670255
Pyruvate-flavodoxin oxidoreductase	Q1RC17	ydbK	5.96	128.7	1.16697e+08	7.26869e+07	4.1481e+07	1.1393e+08	4.35636e+07	2.4992e+07
UDP-N-acetylmuramoyl-tripeptide--D-alanyl-D-alanine ligase	Q1RGA9	murF	5.44	47.3	2.09395e+07	2.04953e+07	9.26419e+06	2.06263e+07	1.0733e+07	6.60428e+06
Ferrochelatase	Q1RF60	hemH	6.44	35.9	2.57916e+07	2.37481e+07	2.03679e+07	2.53657e+07	3.1443e+07	2.47735e+07
Pseudouridine synthase	Q1RD71	yceC	9.85	36	306188	247174	532142	298195	896593	757686
4-diphosphocytidyl-2-C-methyl-D-erythritol kinase	Q1RCN0	ipk	5.26	30.9	4.21805e+06	2.83287e+06	1.2955e+06	4.09648e+06	731172	558428
Coenzyme A biosynthesis bifunctional protein CoaBC	Q1R4V3	dfp	8.21	46.3	2.12438e+07	2.49765e+07	6.44977e+06	2.06807e+07	9.49395e+06	7.67655e+06
DNA-directed RNA polymerase subunit beta'	Q1R5V4	rpoC	7.08	155.1	1.09864e+09	7.82756e+08	4.76909e+08	1.06863e+09	4.50219e+08	2.20379e+08
Formate dehydrogenase-O, iron-sulfur subunit	Q1R422	fdoH	5.33	33.1	1.19235e+08	1.56979e+08	9.09746e+07	1.15536e+08	1.40204e+08	1.32678e+08
Siroheme synthase	Q1R5R3	cysG	6.1	50	1.3258e+06	1.56354e+06	1.62462e+06	1.28837e+06	1.12118e+06	81692.2
Selenide, water dikinase	Q1RB29	selD	5.33	36.8	1.28195e+08	1.0878e+08	5.36206e+07	1.2453e+08	8.17886e+07	5.67224e+07
Putative serine protease	Q1RDX6	UTI89_C0953	7.18	30.3	1.68081e+06	1.382e+06	236939	1.61439e+06	2.4927e+06	2.61912e+06
Hypothetical oxidoreductase YgjR	Q1R6P3	ygjR	6.39	37.1	766578	0	389941	737233	581584	353900
Regulator of RpoS	Q1RCK3	rssB	5.52	37.2	4.67873e+06	1.33241e+06	2.60272e+06	4.48738e+06	3.43687e+06	3.12724e+06
High frequency lysogenization protein HflD	Q1RD21	ycfC	9.25	23.1	1.90756e+07	1.26581e+07	18760557	1.83816e+07	1.28063e+07	1.63621e+07
Ribosomal RNA small subunit methyltransferase C	Q1R2D5	rsmC	6.8	37.6	1.3285e+07	1.09575e+07	1.16265e+07	1.27628e+07	1.22841e+07	1.09378e+07
Transcriptional repressor of nag (N-acetylglucosamine) operon	Q1REQ1	nagC	7.36	44.5	1.0338e+07	6.45661e+06	3.9528e+06	9.96734e+06	6.23617e+06	2.95276e+06
Aldose 1-epimerase	Q1REH5	galM	5.05	38.2	4.43778e+07	4.34219e+07	2.18962e+07	4.27287e+07	2.23517e+07	1.31009e+07
Bifunctional beta-ketoacyl-ACP synthase I/malonyl-ACP decarboxylase	Q1R989	fabB	5.54	42.6	3.321e+08	3.18889e+08	1.59226e+08	3.20562e+08	1.32524e+08	5.68998e+07
Transketolase	Q1R793	tktA	5.88	73.3	5.38845e+07	3.67027e+07	2.31118e+07	5.17903e+07	3.58667e+07	1.4785e+07
Disulfide bond formation protein B	Q1RCR1		8.47	20.1	1.03645e+06	596302	619701	985346	2.86029e+06	1.71873e+06
Putative capsid protein of prophage	Q1RCD4	UTI89_C1502	5.52	38.5	404806	193615	0	386249	167697	0
Uncharacterized protein	Q1RBB8	ynhG	9.51	36.1	9.93093e+07	1.23406e+08	63990882	9.48357e+07	7.85039e+07	6.38557e+07
Uncharacterized protein	Q1REL1	ybgK	8.35	34.5	3.64538e+07	2.86205e+07	2.11984e+07	3.46089e+07	2.4881e+07	2.24611e+07
Putative metalloprotease YggG	Q1R792	yggG	8.38	35.4	6.8169e+07	7.64501e+07	1.14426e+08	6.50875e+07	9.30793e+07	1.06486e+08
Ferredoxin-type protein	Q1R9L5	napH	8.56	31.9	644946	439617	336258	615581	453864	0
Uncharacterized protein	Q1R8E7	yfiQ	6.64	97.9	2.9541e+07	1.87604e+07	1.02838e+07	2.81871e+07	1.9116e+07	5.23617e+06
ABC transporter, ATP-binding protein	Q1R223	UTI89_P015	6.01	25.6	4.25389e+07	3.77841e+07	4.35826e+07	4.05198e+07	4.50155e+07	3.83447e+07
Penicillin-binding protein activator LpoB	Q1RD49	UTI89_C1233	6.93	22.6	1.17993e+08	1.26034e+08	1.36536e+08	1.1291e+08	1.2193e+08	1.46917e+08
Uncharacterized protein	Q1RCA1	yciO	6.4	24.5	6.70992e+07	6.02277e+07	3.20662e+07	6.37928e+07	3.8467e+07	2.81438e+07
Putative transport system permease protein	Q1RAM2	yecS	9.35	24.8	3.89264e+06	5.7378e+06	6.3912e+06	3.69382e+06	8.70836e+06	6.64486e+06
Oligopeptide transport ATP-binding protein OppF	Q1RCI9	oppF	7.75	37.2	1.80017e+07	1.31138e+07	1.5936e+07	1.71943e+07	2.32989e+07	1.52795e+07
Outer membrane protein 1b (Ibc)	Q1R9K0	ompC	4.82	40	3.53068e+10	3.27628e+10	4.13862e+10	3.36899e+10	3.44828e+10	3.87656e+10
Hydrogenase-1 small chain	Q1RDP0	hyaA	6.6	41.6	5.31374e+08	5.36045e+08	4.01439e+08	5.06589e+08	6.15209e+08	5.70405e+08
3-methyl-2-oxobutanoate hydroxymethyltransferase	Q1RG56	panB	5.43	28.1	7.95405e+06	1.35903e+07	1.04514e+07	7.56108e+06	1.43548e+07	1.00883e+07
Thiamine-monophosphate kinase	Q1RFC3	thiL	4.72	35	9.43345e+06	1.13961e+07	3.16841e+06	8.98422e+06	5.5912e+06	2.63767e+06
Cysteine desulfurase IscS	Q1R8K2	iscS	6.48	46	2.52397e+07	1.89631e+07	2.18042e+07	2.39494e+07	1.27708e+07	2.8184e+07
3-oxoacyl-[acyl-carrier-protein] synthase 2	Q1RD61	fabF	5.95	43.1	9.93253e+06	5.20453e+06	2.46108e+06	9.36972e+06	1.07246e+07	2.00414e+06
CinA-like protein	Q1R9G6	UTI89_C2531	5.36	44.2	8.26291e+06	3.92396e+06	2.32462e+06	7.76017e+06	3.04813e+06	1.25469e+06
Uncharacterized protein	Q1R345	ytfB	4.79	25	1.33726e+07	7.71083e+06	1.24559e+07	1.26546e+07	1.23754e+07	1.39031e+07
Regulator of sigma D	Q1R5W1	yjaE	5.57	18.2	1.23901e+07	1.48778e+07	6.55756e+06	1.16775e+07	1.06777e+07	7.03861e+06
Putative gluconeogenesis factor	Q1REF0	ybhK	6.46	35	623391	1.29487e+06	354024	588526	438022	338628
Ribosomal RNA large subunit methyltransferase E	Q1R6F9	rrmJ	9.41	23.3	1.42262e+07	1.31173e+07	1.2555e+07	1.34078e+07	1.26709e+07	1.38317e+07
Ribosomal RNA small subunit methyltransferase H	Q1RGB3	mraW	6.46	34.9	3.98987e+07	2.15668e+07	1.77955e+07	3.77612e+07	2.25708e+07	2.23474e+07
Tellurite resistance protein TehB	Q1RBY6	tehB	6.35	22.4	2.20386e+07	2.10773e+07	1.07111e+07	2.08613e+07	1.51774e+07	1.00124e+07
Modulator of FtsH protease HflC	Q1R385	hflC	6.68	37.6	5.57118e+08	5.29905e+08	5.49909e+08	5.26487e+08	6.84806e+08	6.38493e+08
N-acetylmannosamine kinase	Q1R6B8	UTI89_C3652	6.3	30.8	7.0922e+06	6.04931e+06	3.47887e+06	6.6685e+06	4.9456e+06	5.21422e+06
Molybdopterin biosynthesis protein MoeA	Q1RE98	moeA	5.14	44	3.80177e+07	3.01854e+07	1.29891e+07	3.59604e+07	1.515e+07	4.4332e+06
UDP-3-O-(3-hydroxymyristoyl)glucosamine N-acyltransferase	Q1RG10	lpxD	6.54	36.1	2.18042e+07	1.82016e+07	1.11574e+07	2.05557e+07	1.25782e+07	5.53781e+06
2-dehydro-3-deoxygluconokinase	Q1R577	kdgK	7.05	47.3	1.28534e+07	7.81159e+06	3.83649e+06	1.21638e+07	6.1472e+06	2.89981e+06
Nitrite extrusion protein	Q1RCL2	narK	9.63	49.9	8.3152e+06	7.44992e+06	6.0962e+06	7.84494e+06	5.64789e+06	6.03176e+06
Fumarate hydratase class II	Q1RBI7	fumC	6.48	50.5	1.77848e+07	1.15857e+07	7.97077e+06	1.68079e+07	8.28816e+06	2.19299e+06
Uncharacterized protein	Q1RED4	ybhS	8.27	42.1	1.49781e+07	8.75876e+06	5.67398e+06	1.40368e+07	8.14417e+06	1.7588e+07
1-deoxy-D-xylulose 5-phosphate reductoisomerase	Q1RG16	dxr	6.01	43.3	4.71094e+06	7.37612e+06	0	4.39004e+06	3.37435e+06	1.62797e+06
Uncharacterized protein	Q1R769	yggN	8.88	26.4	2.34935e+09	4.65177e+09	2.92778e+09	2.20435e+09	2.57668e+09	2.56022e+09
Sigma-E factor regulatory protein RseB	Q1R8G1	rseB	8.57	35.7	2.46366e+07	2.35097e+07	1.32814e+07	2.30701e+07	1.7547e+07	1.75222e+07
Thiol peroxidase	Q1RC41	tpx	4.92	17.8	4.2796e+07	2.63206e+07	2.47285e+07	4.01536e+07	3.52823e+07	3.08968e+07
Ribosomal RNA large subunit methyltransferase M	Q1R7N4	ygdE	7.09	41.8	9.26545e+06	8.28972e+06	3.99658e+06	8.64477e+06	5.11846e+06	3.72859e+06
Anaerobic C4-dicarboxylate transporter	Q1R3C2	dcuA	7.75	45.7	6.84282e+07	6.12668e+07	7.81063e+07	6.36952e+07	6.08724e+07	4.48945e+07
Fumarate hydratase class I	Q1R3E1	fumB	6.2	60.1	4.18403e+07	3.53536e+07	2.1278e+07	3.91888e+07	1.83147e+07	8.75998e+06
Serine hydroxymethyltransferase	Q1R8I4		6.48	45.3	1.10723e+08	1.07226e+08	6.34084e+07	1.03513e+08	7.92077e+07	5.47558e+07
Pantothenate synthetase	Q1RG57	panC	6.28	31.6	8.63127e+07	7.54612e+07	2.51113e+07	8.06799e+07	3.86392e+07	2.3438e+07
Uncharacterized protein	Q1R9X5	UTI89_C2371	8.34	40.9	3.48427e+08	3.26254e+08	3.89514e+08	3.24243e+08	3.78052e+08	3.92325e+08
Carbamoyl-phosphate synthase large chain	Q1RGG7	carB	5.36	117.8	1.55616e+08	1.20937e+08	7.14071e+07	1.44823e+08	7.41574e+07	4.86686e+07
30S ribosomal protein S5	Q1R627	rpsE; AL524_RS00805	10.11	17.6	7.93191e+08	7.65338e+08	4.67678e+08	7.4439e+08	7.00401e+08	5.27918e+08
Probable N-acetylmuramoyl-L-alanine amidase ybjR	Q1RE58	ybjR	8.09	31.1	3.72736e+07	2.22846e+07	4.63061e+07	3.44013e+07	5.39445e+07	6.28598e+07
NADH pyrophosphatase	Q1R5W2	nudC	5.91	29.7	1.53718e+07	3.13291e+06	4.3063e+06	1.42989e+07	1.06424e+07	4.76896e+06
Rhomboid protease GlpG	Q1R5L1	glpG	9.2	31.3	1.7744e+06	817744	1.64323e+06	1.63869e+06	815509	836402
Putative protease YbbK	Q1RF39	ybbK	5.62	33.7	1.60655e+08	1.27388e+08	1.28452e+08	1.49242e+08	1.57862e+08	1.50768e+08
Cytochrome c-type protein	Q1R9L7	napC	8.6	23.1	2.97991e+06	3.3363e+06	2.73012e+06	2.76248e+06	2.07749e+06	1.17298e+06
Hypothetical tRNA/rRNA methyltransferase YfiF	Q1R8F1	yfiF	8.95	40.6	7.75337e+07	8.18386e+07	4.37889e+07	7.1683e+07	6.45467e+07	4.87797e+07
Putative ATP-binding protein in pho regulon	Q1REQ6	ybeZ	6.67	40.6	7.10776e+07	6.96709e+07	2.59204e+07	6.59979e+07	4.86203e+07	2.87721e+07
Uncharacterized protein	Q1R6E2	yrbC	9.36	23.9	2.57314e+07	2.44492e+07	2.56885e+07	2.37378e+07	2.16707e+07	2.14367e+07
Molybdenum import ATP-binding protein ModC	Q1REG5	modC	8.87	39	5.25439e+06	5.21047e+06	4473756	4.88242e+06	5.39646e+06	5.89072e+06
GlnQ protein, subunit of glutamine ABC transporter	Q1REB6	glnQ	6.35	26.7	9.89042e+07	1.17896e+08	8.74629e+07	9.13332e+07	1.10041e+08	1.00448e+08
ATP phosphoribosyltransferase	Q1RA54	hisG	5.63	33.3	5.44912e+06	4.5407e+06	2079343	5.03395e+06	4.02001e+06	3.96374e+06
Phospho-2-dehydro-3-deoxyheptonate aldolase	Q1RB91	aroH	6.9	38.7	4.13064e+06	3.71864e+06	2.08522e+06	3.84192e+06	2.14463e+06	1.26712e+06
Bifunctional protein PutA	Q1RDK3	putA	6.04	146.4	7.23234e+08	6.12264e+08	3.36401e+08	6.69914e+08	4.26358e+08	2.34581e+08
Dihydroorotate dehydrogenase (quinone)	Q1RDR9		7.81	36.8	7.9219e+07	9.35526e+07	6.57156e+07	7.32813e+07	9.10776e+07	7.90925e+07
Anaerobic dimethyl sulfoxide reductase subunit B	Q1RDW1	dmsB	6.61	22.9	1.58828e+07	1.42633e+07	1.23529e+07	1.46862e+07	1.96927e+07	1.47684e+07
Uncharacterized protein	Q1RCG3	UTI89_C1471	5.17	41.8	8.3341e+06	8.75513e+06	3.31372e+06	7.64816e+06	4.00281e+06	2.11156e+06
Uncharacterized protein	Q1R542	yiaF	9.23	30.1	2.83991e+08	2.46559e+08	2.32288e+08	2.59874e+08	2.76174e+08	2.21453e+08
Nucleoid-associated protein YejK	Q1R9N2	yejK	4.88	37.8	3.63715e+07	2.95796e+07	1.5881e+07	3.33111e+07	1.87131e+07	1.28694e+07
Putative oxidoreductase	Q1RF35	ybbO	8.81	29.4	1.23306e+07	8.28296e+06	5.99506e+06	1.12698e+07	1.20307e+07	1.12485e+07
Iron-sulfur cluster carrier protein	Q1R9V9	mrp	6.52	41.1	2.80473e+07	3.06414e+07	1.1375e+07	2.56159e+07	1.17178e+07	7.77401e+06
Putative transport protein	Q1R334	ytfL	4.91	49.7	3.79467e+06	5.24424e+06	4.53154e+06	3.48908e+06	3.97484e+06	1.61647e+06
Glycerol-3-phosphate regulon repressor	Q1R5L2	glpR	6.4	30.1	1.06291e+07	4.95039e+06	2.48657e+06	9.72848e+06	6.09245e+06	3.43269e+06
Cytochrome c-type biogenesis protein CcmF	Q1R9M3	ccmF	9.63	71.3	6.68495e+06	5.25471e+06	7.70896e+06	6.11153e+06	5.9152e+06	4.43126e+06
4-hydroxy-3-methylbut-2-enyl diphosphate reductase	Q1RGH3	ispH	5.22	34.7	3.55579e+06	2.57327e+06	1.40847e+06	3.27144e+06	2.75077e+06	1.414e+06
6-phosphogluconate dehydrogenase, decarboxylating	Q1RA44	gnd	5.2	51.4	2.55986e+08	2.70232e+08	8.50886e+07	2.34526e+08	8.81622e+07	4.20713e+07
Thiol:disulfide interchange protein	Q1R455	dsbA	6.34	23.1	772718	912650	870601	706765	557806	266967
Glutaminase	Q1RF47	ybaS	4.97	32.9	4.48883e+08	3.66339e+08	1.42844e+08	4.13138e+08	2.18264e+08	1.56261e+08
Formate acetyltransferase 1	Q1RDV5	pflB	6.01	85.3	4.09736e+09	2.93434e+09	1.18032e+09	3.76987e+09	1.36234e+09	6.83453e+08
Glutamate racemase	Q1R3U0	murI	5.19	31.1	1.59207e+07	1.1983e+07	4.5909e+06	1.46413e+07	1.24307e+07	7.80697e+06
Exodeoxyribonuclease X	Q1RAU2	exoX	7.56	25.1	2.83904e+06	2.14233e+06	1.96326e+06	2.61477e+06	1.89593e+06	225669
Uncharacterized protein	Q1R9S6	yeiA	5.58	45.3	6.94929e+06	9.44418e+06	3.5569e+06	6.37009e+06	3.51296e+06	1.45243e+06
Mannonate dehydratase	Q1R2J3	uxuA	5.62	44.8	8.47333e+06	8.88213e+06	2.67059e+06	7.77851e+06	3.95197e+06	1.02698e+06
30S ribosomal protein S7	Q1R5U2	rpsG	10.3	17.6	5.10162e+08	6.14291e+08	5.03e+08	4.6985e+08	6.32723e+08	5.68979e+08
Peptidyl-prolyl cis-trans isomerase	Q1R5T6	fkpA	8.47	28.9	646681	2.41285e+06	0	588547	675324	841124
Uncharacterized protein	Q1R6V2	yqiA	4.75	21.6	4.95747e+06	1.40822e+06	0	4.48749e+06	2.43084e+06	0
Uncharacterized protein	Q1R9P3	rtn	6.4	58.5	2.22016e+06	3.15361e+06	4.9316e+06	2.01506e+06	1.47054e+06	2.37815e+06
Ribosomal RNA large subunit methyltransferase J	Q1R5B7	yhiR	8.76	33.7	2.22987e+07	1.84229e+07	1.37834e+07	2.02965e+07	1.52052e+07	1.15129e+07
Protein RpiR	Q1R3H2	rpiR	6.3	33.5	3.42969e+07	2.65027e+07	1.82564e+07	3.10824e+07	2.73527e+07	2.32942e+07
Glutamate 5-kinase	Q1RFS8	proB	6.54	39	4.31873e+07	4.54285e+07	1.88513e+07	3.91974e+07	3.6102e+07	1.80496e+07
Octanoyltransferase	Q1RET2	lipB	6.29	23.9	4.24366e+06	3.7061e+06	1.35779e+06	3.86948e+06	3.63524e+06	1.5904e+06
ATP synthase gamma chain	Q1R4K1	atpG	8.76	31.6	3.34752e+08	2.77968e+08	2.99375e+08	3.04617e+08	4.08778e+08	3.79016e+08
50S ribosomal protein L1	Q1R5U9	rplA	9.64	24.7	9.78057e+08	1.13135e+09	7.65655e+08	8.88355e+08	9.24879e+08	8.34749e+08
Uncharacterized protein	Q1R599	chuY	6.38	21.8	179679	359730	0	162033	188284	239761
Hypothetical transcriptional regulator YcjZ	Q1RFP5	ycjZ	5.73	36	2.08944e+06	1.86901e+06	0	1.89034e+06	684262	293984
50S ribosomal protein L3	Q1R602	rplC	9.91	22.2	2.02396e+08	1.74653e+08	7.32013e+07	1.82881e+08	2.80637e+08	2.40318e+08
Hypothetical ABC transporter ATP-binding protein ynjD	Q1RB36	ynjD	7.83	25.3	706654	0	653335	634777	475371	631675
Arginine 3rd transport system permease protein	Q1RE64	artM	8.92	24.9	2.49137e+06	1.17317e+06	2.03217e+06	2.24819e+06	2.79338e+06	1.48027e+06
Lipoprotein releasing system transmembrane protein lolC	Q1RD38	ycfU	6.29	43.2	1.07154e+07	5.25377e+06	1.04839e+07	9.66978e+06	1.27755e+07	1.09214e+07
Glycolate oxidase subunit D	Q1R723	glcD	5.14	53.8	337020	0	494930	304670	318009	0
Adenosylcobinamide-GDP ribazoletransferase	Q1RAB6	cobS	9.06	27.7	2.19211e+06	0	1.68128e+06	1.97082e+06	1.52122e+06	1.37243e+06
Putative enzyme	Q1R7M7	ygdL	8.51	28.5	2.04246e+06	1.7857e+06	0	1.84697e+06	0	0
Na(+)/H(+) antiporter NhaB	Q1RCR0		6.61	56.7	7.88211e+06	6.90437e+06	8.38076e+06	7.11528e+06	5.89736e+06	4.85463e+06
Uncharacterized protein	Q1R2Z1	yjgQ	9.48	39.7	3.29208e+07	2.07344e+07	2.79402e+07	2.96808e+07	2.94229e+07	2.83639e+07
1-acyl-sn-glycerol-3-phosphate acyltransferase	Q1R6X3	plsC	9.61	27.4	7.84572e+06	6.14266e+06	8.32655e+06	7.09142e+06	7.45441e+06	8.5294e+06
Glycerophosphodiester phosphodiesterase, cytosolic	Q1R5H9	ugpQ	6.3	27.3	1.99248e+07	1.71882e+07	1.11589e+07	1.79648e+07	1.15689e+07	1.17766e+07
7-cyano-7-deazaguanine synthase	Q1RF91	ybaX	6.06	25.4	2.74395e+06	4.20376e+06	1.21511e+06	2.4745e+06	1.46006e+06	612318
Lipoate-protein ligase A	Q1R257	lplA	5.87	37.9	5.00336e+06	2.03025e+06	867262	4.52168e+06	1.74261e+06	562529
Thymidine phosphorylase	Q1R261	deoA	5.33	49.8	6.62534e+07	5.10941e+07	1.73682e+07	5.95449e+07	2.36808e+07	1.67103e+07
30S ribosomal protein S4	Q1R636	rpsD; AB182_RS27855	10.05	23.5	8.47351e+08	9.3302e+08	6.87392e+08	7.62949e+08	8.94343e+08	7.93441e+08
Periplasmic trehalase	Q1RCP3	treA	5.91	63.7	3.38135e+06	3.85832e+06	6.84989e+06	3.03852e+06	4.16945e+06	1.29166e+06
tRNA-specific 2-thiouridylase MnmA	Q1RD20		5.1	40.9	2.89741e+06	4.75544e+06	489392	2.60401e+06	958485	648011
Glutathione-regulated potassium-efflux system ancillary protein KefG	Q1R5T1	yheR	7.53	20.9	934712	0	445196	836831	762209	1.04019e+06
Phosphate acyltransferase	Q1RD67	plsX	9.17	38.2	1.82485e+06	1.19163e+06	81491.4	1.6233e+06	1.45296e+06	879281
Transcription termination/antitermination protein NusG	Q1R5U6	nusG	6.81	20.5	1.07342e+08	7.57757e+07	6.55295e+07	9.59397e+07	6.19236e+07	6.26558e+07
Hypothetical oxidoreductase YghA	Q1R6Z3	yghA	7.09	31.6	2.71665e+07	2.54649e+07	9.85223e+06	2.41868e+07	1.32537e+07	9.59708e+06
Probable zinc protease PqqL	Q1RBS8	pqqL	6.58	104.6	391363	304824	96183.8	350823	0	0
Putative ATP-binding component of a transport system	Q1R6D3	yhbG	5.99	26.8	5.9892e+07	4.6472e+07	5.43799e+07	5.34655e+07	7.09862e+07	5.89214e+07
Uncharacterized protein	Q1R2S3	UTI89_C4938	7.87	39.6	1.08827e+07	8.34834e+06	4.55501e+06	9.74664e+06	5.64532e+06	3.4272e+06
Acetyl-coenzyme A carboxylase carboxyl transferase subunit beta	Q1R996	accD	7.68	33.3	1.80433e+08	1.3828e+08	9.00582e+07	1.60449e+08	1.22797e+08	1.03827e+08
Inositol-1-monophosphatase	Q1R8J9	suhB	6.96	29.2	2.27592e+07	2.33443e+07	1.62633e+07	2.03179e+07	2.44122e+07	2.24382e+07
Dihydrofolate reductase	Q1RGF0	folA	4.94	23.2	8.01218e+06	8.68068e+06	3.88163e+06	7.17552e+06	3.54635e+06	3.69121e+06
NADH dehydrogenase I chain M	Q1R9E0	nuoM	8.48	56.5	4.84666e+06	3.12576e+06	5.29192e+06	4.34641e+06	4.34557e+06	4.36665e+06
Ferrous iron transport protein B	Q1R5M5	feoB	6.19	84.8	3.02702e+06	3.62994e+06	166331	2.66736e+06	2.34537e+06	458216
Uncharacterized protein	Q1R2E1	yjjP	8.65	30.5	7.93042e+06	0	11244969	7.01985e+06	5.75512e+06	7.00189e+06
Phosphate-specific transport system accessory protein PhoU	Q1R4L1	phoU	5.16	28.2	4.1741e+07	1.71047e+07	2.36464e+07	3.69186e+07	3.15817e+07	2.40429e+07
LPS-assembly lipoprotein LptE	Q1RES0	rlpB	8.68	21.3	1.47772e+08	1.8203e+08	1.96039e+08	1.31015e+08	1.78068e+08	1.8445e+08
Putative membrane protein	Q1R5C7	yhiI	6.86	38.7	1.67261e+08	1.70694e+08	1.10251e+08	1.47785e+08	1.48638e+08	1.43625e+08
N-acetylglucosamine metabolism	Q1REQ2	nagD	5.41	27.1	2.50776e+07	1.65826e+07	1.86377e+07	2.2154e+07	1.14103e+07	1.39052e+07
Uncharacterized protein	Q1R8Q2	ypfJ	5.9	31.4	6.40478e+06	9.27053e+06	7.94305e+06	5.64773e+06	4.6274e+06	7.60901e+06
Cell division protein ZapE	Q1R6A8	yhcM	6.96	43.1	4.03629e+06	2.70246e+06	710469	3.57624e+06	2.35048e+06	1.18327e+06
Geranyltranstransferase	Q1RFB9	ispA	5.55	32.2	6.31557e+06	6.12459e+06	2.77878e+06	5.60844e+06	3.66702e+06	3.21388e+06
D-alanine--D-alanine ligase	Q1RFG5	ddl	5.19	39.3	1.01568e+07	7.3692e+06	1.57589e+06	9.0039e+06	3.49398e+06	990189
Glycerol-3-phosphate dehydrogenase [NAD(P)+]	Q1R4Y7	gpsA	6.54	36.3	6.75437e+07	5.21923e+07	2.62449e+07	5.99172e+07	3.40322e+07	2.7982e+07
Octaprenyl diphosphate synthase	Q1R6E9	ispB	4.81	35.2	1.81321e+07	1.06596e+07	6.52644e+06	1.60949e+07	7.7911e+06	8.64806e+06
Uncharacterized protein	Q1RB10	yeaF	5.85	27.8	2.25941e+08	2.2123e+08	2.21746e+08	1.97495e+08	3.14418e+08	3.11713e+08
Putative glycosyltransferase WbdM	Q1RA42	wbdM	8.79	41.1	1.61003e+07	8.98903e+06	1.68648e+07	1.4065e+07	1.11266e+07	1.04527e+07
Putative sugar nucleotide epimerase	Q1R9A9	yfcH	7.53	32.6	4.66659e+07	3.11773e+07	2.47023e+07	4.10942e+07	3.65836e+07	3.21122e+07
Ribosomal RNA small subunit methyltransferase G	Q1R4J2	gidB	6.54	23.4	2.19109e+06	1.96281e+06	908230	1.92412e+06	2.00516e+06	1.49062e+06
Site-determining protein	Q1RCS2	minD	5.38	29.6	3.77846e+08	2.87987e+08	1.99348e+08	3.32808e+08	2.50717e+08	2.32505e+08
Ribosomal RNA small subunit methyltransferase A	Q1RGE6	ksgA	8.43	30.3	7.7633e+06	5.35776e+06	4.57324e+06	6.79539e+06	3.84156e+06	3.15909e+06
Fumarate and nitrate reduction regulatory protein	Q1RC31	fnr	8.88	30.1	1.10531e+07	6.69199e+06	5.29043e+06	9.73666e+06	7.16671e+06	5.23312e+06
Uncharacterized protein	Q1R9U9	yehT	6.24	27.9	3.67834e+06	3.85458e+06	1.08607e+06	3.21351e+06	2.558e+06	938946
Elongation factor P-like protein	Q1R9P8		5.02	21.5	9.43848e+06	8.11739e+06	1.93884e+06	8.24795e+06	1.29102e+06	2.4023e+06
Thioredoxin/glutathione peroxidase BtuE	Q1RB85	btuE	4.98	20.4	1.51025e+07	1.06144e+07	7.10072e+06	1.33053e+07	9.776e+06	5.03061e+06
Phosphofructokinase	Q1R9Q3	fruK	5.54	33.7	2.38726e+07	1.67595e+07	3.51128e+06	2.09027e+07	8.0952e+06	2.97158e+06
Signal peptidase I	Q1R8G4	lepB	7.33	35.9	7.2019e+07	6.62757e+07	4.95184e+07	6.33026e+07	6.4876e+07	7.51667e+07
Histidine kinase	Q1R7Q6	barA	5.64	102.4	1.06363e+06	843338	1.07317e+06	929768	179365	856018
1-(5-phosphoribosyl)-5-[(5-phosphoribosylamino)methylideneamino] imidazole-4-carboxamide isomerase	Q1RA49		5.68	26	5.18842e+06	5.76341e+06	701323	4.51754e+06	2.3684e+06	1.68775e+06
L-fucose mutarotase	Q1R7N6	fucU	5.86	15.5	8.24437e+06	2.14443e+06	6.80981e+06	7.19331e+06	1.54077e+07	1.22807e+07
SanA protein	Q1R9S9	sanA	9.17	27.3	3.8069e+06	4.32068e+06	3.45699e+06	3.30897e+06	3.36376e+06	2.90562e+06
Uncharacterized protein	Q1R2F6	yjiA	4.93	36.9	8.81221e+06	3.8227e+06	1.8453e+06	7.63589e+06	3.81372e+06	2.39203e+06
Uncharacterized protein	Q1RBC3	ydhV	7.46	81.3	661766	658689	249204	577729	64801.8	0
tRNA N6-adenosine threonylcarbamoyltransferase	Q1R6R7	ygjD	6.11	36	8.58042e+06	7.97327e+06	2.79478e+06	7.45376e+06	4.11183e+06	3.82964e+06
Glutaredoxin 2	Q1RD93	grxB	7.96	24.3	9.96748e+08	9.27762e+08	4.39304e+08	8.6665e+08	5.74907e+08	3.87464e+08
Hypothetical transcriptional regulator YieP	Q1R4H7	yieP	6.34	26.1	4.60852e+06	3.50469e+06	2.10903e+06	4.00201e+06	2.6599e+06	2.38447e+06
Putative transcriptional regulator LYSR-type	Q1RFY3	UTI89_C0227	7.01	33.7	2.0378e+07	1.21395e+07	8.25984e+06	1.76788e+07	1.36085e+07	1.2898e+07
Uncharacterized protein	Q1REY7	ybdG	8.15	46.6	3.61327e+07	2.53364e+07	2.54964e+07	3.14469e+07	3.41856e+07	3.11276e+07
Exodeoxyribonuclease III	Q1RB43	xthA	6.19	31.3	2.77845e+07	1.60719e+07	7.65838e+06	2.4183e+07	1.28708e+07	1.00288e+07
T-protein	Q1R8C5	tyrA	6.01	42	1.3481e+06	830571	622638	1.17004e+06	1.0878e+06	649049
Bifunctional ligase/repressor BirA	Q1R5X8	birA	6.83	35.4	4.06451e+06	2.36132e+06	1.76355e+06	3.52163e+06	2.0452e+06	1.18524e+06
Lipid A biosynthesis myristoyltransferase	Q1RAS9	msbB	9.58	37.4	3.03268e+07	1.86983e+07	2.509e+07	2.64402e+07	3.53983e+07	3.09436e+07
NADH-quinone oxidoreductase subunit H	Q1R9D5	nuoH	7.4	36.2	3.35337e+07	2.95957e+07	4.2619e+07	2.90675e+07	3.48988e+07	3.3278e+07
30S ribosomal protein S2	Q1RG21	rpsB	7.14	26.7	1.46551e+09	1.3623e+09	9.27267e+08	1.27263e+09	1.26078e+09	1.01481e+09
Orotate phosphoribosyltransferase	Q1R4V0	pyrE	5.49	24.1	2.0099e+07	9.26457e+06	7.89733e+06	1.73181e+07	2.52435e+07	1.49004e+07
Starvation induced outer membrane protein	Q1R5B1	slp	6.79	22.2	1.55271e+10	1.1428e+10	1.42675e+10	1.33334e+10	1.99167e+10	1.88378e+10
O-sialoglycoprotein endopeptidase	Q1RAY7	yeaZ	5	25.2	1.73162e+06	1.06357e+06	285491	1.49888e+06	581159	0
Uncharacterized protein	Q1RC37	UTI89_C1599	5.08	34	4.28982e+07	3.68675e+07	1.795e+07	3.69017e+07	1.77595e+07	1.58786e+07
Oxidoreductase UcpA	Q1R8U5	ucpA	5.41	30.6	6.0291e+07	4.56428e+07	2.58557e+07	5.20493e+07	3.19182e+07	3.03336e+07
Molybdenum cofactor biosynthesis protein B	Q1REE7	moaB	6.1	18.7	3.24183e+06	3.67394e+06	3.45165e+06	2.79276e+06	3.84145e+06	4.13403e+06
Hypothetical GST-like protein YliJ	Q1RE87	yliJ	5.17	23.9	2.39865e+07	1.94113e+07	1.1637e+07	2.06372e+07	1.65e+07	6.54942e+06
Pyruvate kinase	Q1RBC0	pykF	7.11	58.7	4.24425e+08	3.62934e+08	1.98313e+08	3.66057e+08	1.95785e+08	8.93849e+07
S-(hydroxymethyl)glutathione dehydrogenase	Q1RFI7	adhC	6.28	39.3	4.39137e+06	4.06191e+06	1.0564e+06	3.78774e+06	1.64323e+06	644248
Putative inner membrane protein TolR	Q1REI7	tolR	5.57	15.4	8.06018e+06	484054	9.04293e+06	6.88115e+06	8.95251e+06	8.00969e+06
UPF0227 protein YcfP	Q1RD46	ycfP	6.99	23.3	7.77298e+07	3.52177e+07	2.64022e+07	6.6381e+07	3.90783e+07	2.75259e+07
Uncharacterized protein	Q1R846	UTI89_C3012	7.39	33.9	8.63402e+06	3.69468e+06	3.56348e+06	7.39374e+06	3.2781e+06	4.25495e+06
tRNA-modifying protein YgfZ	Q1R7D2	ygfZ	5.38	36.2	1.92958e+08	1.5839e+08	7.62638e+07	1.64489e+08	1.00672e+08	6.50435e+07
Uncharacterized protein	Q1RAB8	erfK	8.92	34.4	4.22859e+07	3.98839e+07	1.91679e+07	3.60979e+07	2.51637e+07	1.96188e+07
tRNA pseudouridine synthase B	Q1R6H2	truB	5.97	35.1	1.06127e+07	8.77903e+06	4.1882e+06	9.05798e+06	6.46285e+06	0
2-keto-3-deoxygluconate 6-phosphate aldolase	Q1RAT5	eda	5.67	22.3	6.78393e+06	6.05817e+06	6.1066e+06	5.78083e+06	4.35722e+06	5.72408e+06
Aspartate-semialdehyde dehydrogenase	Q1R5J3	asd	5.47	42.3	6.15829e+07	7.48237e+07	1.57632e+07	5.25845e+07	3.02803e+07	1.62147e+07
DNA-directed RNA polymerase subunit alpha	Q1R637	rpoA; AL524_RS00765	5.06	36.5	3.66062e+08	3.96933e+08	2.27347e+08	3.12789e+08	2.69186e+08	2.29138e+08
Cysteine sulfinate desulfinase	Q1R7M9	UTI89_C3183	6.06	44.8	2.37772e+06	1.03183e+06	0	2.01269e+06	674715	398860
Uncharacterized protein	Q1R433	yihX	5.55	23.6	1.67677e+06	268974	756722	1.42548e+06	587739	818891
Peptidoglycan-associated lipoprotein	Q1REI3	pal	6.8	19.7	1.44716e+09	1.52573e+09	2.1237e+09	1.22338e+09	1.88788e+09	1.91176e+09
Hypothetical lipoprotein YgeR	Q1R7G6	ygeR	10.2	27.5	3.04429e+07	2.29098e+07	3.33443e+07	2.57713e+07	3.82252e+07	3.82604e+07
UDP-N-acetyl-D-mannosaminuronic acid transferase	Q1R4E1	rffM	9.55	28	1.12281e+07	1.15808e+07	1.4147e+07	9.52613e+06	1.11925e+07	1.11175e+07
Lipoprotein	Q1R4S2	nlpA	5.82	29.4	3.69211e+07	4.35266e+07	4.13546e+07	3.13416e+07	3.92008e+07	3.86254e+07
Arginine transport ATP-binding protein ArtP	Q1RE61	artP	6.95	30.8	9.90478e+07	8.54782e+07	9.4596e+07	8.37107e+07	9.99368e+07	7.01319e+07
Lipoprotein	Q1RFZ1	metQ	5.29	29.4	4.56089e+08	3.84481e+08	3.80879e+08	3.87542e+08	4.55286e+08	3.99139e+08
Galactokinase	Q1REH4	galK	5.45	41.5	4.46488e+07	3.6019e+07	1.59564e+07	3.77946e+07	1.78527e+07	1.20275e+07
Phenylalanine--tRNA ligase alpha subunit	Q1RB81	pheS	6.47	37.3	1.04574e+08	9.39122e+07	4.0834e+07	8.8783e+07	4.97234e+07	4.09278e+07
Acetyl-coenzyme A carboxylase carboxyl transferase subunit alpha	Q1RG04	accA	6.04	35.2	1.73251e+08	1.49834e+08	7.63858e+07	1.46568e+08	1.10856e+08	9.17166e+07
Cytochrome d terminal oxidase polypeptide subunit II	Q1REJ2	cydB	7.4	42.4	2.24585e+08	2.10187e+08	2.17508e+08	1.89877e+08	2.72987e+08	1.95387e+08
Ribosome maturation factor RimP	Q1R6G7		4.7	16.8	5.74857e+06	862402	3.49999e+06	4.84705e+06	4.18301e+06	3.90275e+06
Macrolide-specific efflux protein MacA	Q1RE45	macA	8.98	41.8	4.12345e+06	4.27526e+06	6.62813e+06	3.46294e+06	9.65188e+06	3.2108e+06
Uncharacterized protein	Q1R569	yhjQ	5.54	27.9	1.06357e+07	6.42629e+06	9.66532e+06	8.94616e+06	1.06037e+07	6.9257e+06
Lipoprotein NlpD	Q1R7V0	nlpD	9.51	40.1	6.06963e+07	6.31478e+07	8.02251e+07	5.09285e+07	5.63121e+07	5.87607e+07
Esterase FrsA	Q1RFT1	frsA	6.95	47	3.80588e+07	3.56923e+07	1.55264e+07	3.21103e+07	1.28771e+07	7.31412e+06
Peptidyl-prolyl cis-trans isomerase	Q1RF09	ppiB	5.8	18.1	1.35198e+08	9.16098e+07	6.38073e+07	1.13251e+08	7.70193e+07	7.12751e+07
Ribosomal RNA small subunit methyltransferase E	Q1R781	yggJ	7.47	28	2.65462e+06	2.40111e+06	1.85817e+06	2.23104e+06	2.04048e+06	576961
Trans-aconitate 2-methyltransferase	Q1RBP8	tam	4.96	28.9	3.93367e+07	3.10858e+07	1.62304e+07	3.31416e+07	1.93819e+07	1.19323e+07
Proline/betaine transporter	Q1R3F1	proP	8.12	56.1	2.19295e+07	2.05067e+07	1.80823e+07	1.8449e+07	1.84032e+07	1.33674e+07
CDP-diacylglycerol pyrophosphatase	Q1R400	cdh	9.66	35.7	2.06446e+07	1.22583e+07	15551826	1.73292e+07	1.97954e+07	1.90057e+07
D-3-phosphoglycerate dehydrogenase	Q1R7B7	serA	6.35	44.1	6.34696e+06	3.49333e+06	1.53082e+06	5.342e+06	2.53091e+06	1.53659e+06
Delta-aminolevulinic acid dehydratase	Q1RFH5	hemB	5.4	36.9	8.18787e+06	6.22549e+06	4.84574e+06	6.88565e+06	6.39264e+06	4.71326e+06
UDP-3-O-acyl-N-acetylglucosamine deacetylase	Q1RG99	lpxC	5.86	33.9	2.34646e+07	1.58525e+07	1.07712e+07	1.97448e+07	1.70992e+07	1.79917e+07
dTDP-4-dehydrorhamnose reductase	Q1RA35	rfbD	5.94	32.7	4.45779e+07	3.57806e+07	1.38253e+07	3.7422e+07	2.10107e+07	2.24519e+07
Periplasmic glucose-1-phosphatase	Q1RDL5	agp	5.86	45.7	1.65958e+08	1.76452e+08	6.9188e+07	1.39764e+08	5.21891e+07	2.54893e+07
Respiratory nitrate reductase 2 gamma chain	Q1RBV3	narV	9.86	25.7	1.77943e+06	6.68782e+06	3.30289e+06	1.49423e+06	3.79631e+06	2.16367e+06
Succinate--CoA ligase [ADP-forming] subunit alpha	Q1REJ7	sucD	6.79	29.8	4.38665e+08	2.94569e+08	1.27619e+08	3.68519e+08	1.8443e+08	1.2685e+08
D-methionine transport system permease MetI	Q1RFZ0	metI	10.07	23.2	4.94893e+06	2.18155e+06	2.18915e+06	4.12171e+06	3.02601e+06	5.36431e+06
Tetraacyldisaccharide 4'-kinase	Q1RDU3	lpxK	8.73	35.5	2.61443e+06	1.60853e+06	2.19141e+06	2.17979e+06	3.78902e+06	2.36777e+06
Chromosome partition protein MukE	Q1RDT4	mukE	5.15	28.1	8.04341e+06	3.9906e+06	4.80158e+06	6.69009e+06	5.8062e+06	7.73823e+06
Uncharacterized protein	Q1RDT2	ycbB	8.59	67.8	8.32181e+06	6.66024e+06	4.10391e+06	6.90717e+06	3.61677e+06	146278
Hypothetical acetyltransferase YhbS	Q1R6I5	yhbS	4.73	18.5	1.65956e+07	8.58677e+06	6.05113e+06	1.38349e+07	9.59173e+06	8.40865e+06
Putative peptide synthetase	Q1RAD3	UTI89_C2213	5.78	237.6	1.27316e+08	1.10158e+08	6.90861e+07	1.05817e+08	5.8293e+07	3.13118e+07
Putative sulfate transporter YchM	Q1RCN2	ychM	8.81	59.4	5.7741e+06	4.42765e+06	4.33793e+06	4.82951e+06	3.22161e+06	2.77257e+06
Galactonate operon transcriptional repressor	Q1R4P1	dgoR	5.67	26.1	3.43197e+06	2.45176e+06	1.20113e+06	2.86507e+06	1.29709e+06	343795
Uncharacterized protein	Q1R8M0	yfgM	5.16	22.1	3.97068e+07	2.75999e+07	2.85358e+07	3.31946e+07	4.16993e+07	3.582e+07
Outer membrane protein A	Q1RDQ7	ompA	7.03	40.7	9.29872e+10	9.69014e+10	9.63286e+10	7.71747e+10	8.83518e+10	1.00179e+11
Phosphoserine phosphatase	Q1R255	serB	6.11	40.1	1.2295e+07	1.13351e+07	2.55954e+06	1.02055e+07	5.36994e+06	4.4398e+06
Enoyl-[acyl-carrier-protein] reductase [NADH]	Q1RC75	fabI	5.87	27.8	7.18787e+08	5.37438e+08	345871297	5.98459e+08	3.33933e+08	2.69312e+08
6-phosphogluconolactonase	Q1REG3	ybhE	5.27	36.3	6.08256e+07	5.35556e+07	2.72925e+07	5.06204e+07	2.12832e+07	1.26429e+07
Mannosyl-3-phosphoglycerate phosphatase	Q1RAI5	UTI89_C2156	5.08	30.4	1.44355e+07	1.01607e+07	4.89403e+06	1.19852e+07	4.53009e+06	4.60364e+06
Lipopolysaccharide 1,3-galactosyltransferase	Q1R4W4	rafI	7.46	38.8	5.29503e+06	5.91924e+06	3.8239e+06	4.41449e+06	4.08066e+06	5.01538e+06
Lipoyl synthase	Q1RET3	lipA	7.94	36	2.16802e+07	1.69793e+07	1.06133e+07	1.81326e+07	1.25143e+07	1.09012e+07
D-mannonate oxidoreductase	Q1R2J2	uxuB	5.52	53.6	1.10076e+07	8.48924e+06	5.54978e+06	9.15973e+06	3.58909e+06	679494
Uracil phosphoribosyltransferase	Q1R8P0	upp	6.23	23.5	4.31345e+07	3.57551e+07	2.11424e+07	3.60405e+07	2.59601e+07	2.13662e+07
L-lactate dehydrogenase	Q1R4Z0	lldD	6.81	42.7	1.31782e+08	1.52308e+08	6.52436e+07	1.10273e+08	1.18722e+08	7.73424e+07
NarL transcriptional dual regulator	Q1RCL5	narL	6.81	26.5	1.80667e+07	1.44374e+07	8.71072e+06	1.5112e+07	9.80205e+06	8.50799e+06
Putative transport protein	Q1REQ8	ybeX	4.7	33.3	4.05504e+06	2.29757e+06	420460	3.36344e+06	700389	994433
MelR regulator of melibiose operon	Q1R3E4	melR	8.28	34.9	1.26664e+06	0	506790	1.04388e+06	409562	0
Uncharacterized protein	Q1R273	UTI89_C5141	4.79	38.2	1.88251e+07	3.1726e+07	1.36283e+07	1.55275e+07	1.61928e+07	1.3089e+07
Regulator of length of O-antigen component of lipopolysaccharide chains	Q1RA46	cld	6.4	37.8	1.33893e+08	1.08536e+08	1.03508e+08	1.11101e+08	1.29706e+08	1.16365e+08
PTS system, mannose-specific IIAB component	Q1RAX4	manX	6.02	35.1	1.23618e+09	1.11916e+09	8.48985e+08	1.01953e+09	1.24764e+09	1.09367e+09
Histidine biosynthesis bifunctional protein HisB	Q1RA51	hisB	6.18	40.4	1.01604e+07	4.05764e+06	3.61279e+06	8.43044e+06	6.41258e+06	2.60676e+06
Fructose-1,6-bisphosphatase class 1	Q1R324		5.99	36.8	2.01949e+08	1.2844e+08	7.29282e+07	1.66857e+08	9.8805e+07	5.7892e+07
Glyoxylate/hydroxypyruvate reductase A	Q1RDC8		7.01	35.3	2.33041e+06	1.32568e+06	374077	1.92452e+06	924271	407667
Probable regulatory subunit of ethanolamine ammonia-lyase	Q1R8T0	eutB	4.97	49.3	675229	941275	0	557637	534210	0
Nitrite extrusion protein 2	Q1RBU9	narU	10.04	49.9	1.60858e+06	810854	3.51743e+06	1.33403e+06	760214	1.35053e+06
Sensor protein KdpD	Q1REM2	kdpD	6.79	98.7	792310	571110	1.13316e+06	653206	546593	224114
Murein lipoprotein	Q1RBB9	lpp	9.25	8.3	1.15981e+08	1.46691e+08	1.74592e+08	9.46962e+07	1.17596e+08	9.51029e+07
Uncharacterized protein	Q1RC44	ycjX	8.29	55.6	2.09323e+06	2.48968e+06	841528	1.71233e+06	862673	913855
Hypothetical oxidoreductase YajO	Q1RFC1	yajO	5.3	36.4	2.63889e+08	2.11604e+08	9.2123e+07	2.16003e+08	1.35064e+08	9.54604e+07
Protein-L-isoaspartate O-methyltransferase	Q1R7U8	pcm	7.05	23.2	7.44729e+06	4.933e+06	3.44922e+06	6.0967e+06	4.91437e+06	2.47761e+06
Ferrous-iron efflux pump FieF	Q1R404	fieF	6.8	34.6	2.99467e+06	3.3612e+06	2662223	2.46172e+06	4.77852e+06	3.35961e+06
Polysialic acid capsule synthesis protein KpsE	Q1R754	kpsE	6.21	43	3.91997e+07	2.07859e+07	2.87827e+07	3.2203e+07	3.45404e+07	3.63851e+07
Phosphoribosylaminoimidazole-succinocarboxamide synthase	Q1R8Q1	purC	5.25	27.4	9.71508e+07	9.79528e+07	6.9697e+07	7.98273e+07	5.67981e+07	6.59988e+07
Isopentenyl-diphosphate Delta-isomerase	Q1R7E2	UTI89_C3274	6.54	20.5	2.30054e+06	1.77828e+06	808435	1.88668e+06	615589	433413
ADP-L-glycero-D-manno-heptose-6-epimerase	Q1R4X2	rfaD	4.88	34.9	7.87281e+08	5.72653e+08	4.07235e+08	6.44471e+08	5.09258e+08	4.5503e+08
Glutamine--tRNA ligase	Q1REN7	glnS	6.28	63.5	1.45792e+08	6.14448e+07	3.19677e+07	1.19301e+08	3.52827e+07	1.1046e+07
NADH-quinone oxidoreductase subunit I	Q1R9D6	nuoI	5.48	20.5	1.60039e+08	1.49377e+08	1.43325e+08	1.31569e+08	1.9557e+08	1.43127e+08
Adenylate kinase	Q1RF61	adk	6.95	25.8	3.70187e+07	3.16715e+07	1.86283e+07	3.02527e+07	1.8192e+07	1.713e+07
Putative integral membrane protein	Q1R224	UTI89_P014	8.95	40.9	1.19917e+07	6.71608e+06	1.30552e+07	9.7658e+06	1.0685e+07	1.08133e+07
Disulfide oxidoreductase	Q1R9M4	ccmG	6.02	20.8	9.37208e+06	5.77724e+06	7.65723e+06	7.62733e+06	7.46625e+06	9.38105e+06
O-acetyl-ADP-ribose deacetylase	Q1RDB4	ymdB	5.72	18.9	2.06528e+07	1.16495e+07	6.96679e+06	1.68121e+07	8.85934e+06	5.61898e+06
tRNA (cytidine/uridine-2'-O-)-methyltransferase TrmJ	Q1R8K0	yfhQ	6	27	1.59662e+07	1.0354e+07	9.0404e+06	1.29673e+07	7.85501e+06	5.83533e+06
Uncharacterized protein	Q1RDQ3	yccS	7.34	82	1.51724e+06	1.72533e+06	2.07886e+06	1.23712e+06	1.51903e+06	547204
Cell division ATP-binding membraine protein ftsE	Q1R5F7	ftsE	9.33	24.4	1.10429e+08	8.06586e+07	9.09117e+07	8.96636e+07	1.02304e+08	9.3538e+07
sn-glycerol-3-phosphate import ATP-binding protein UgpC	Q1R5H8	ugpC	9.07	39.5	1.76022e+07	1.52207e+07	1.69064e+07	1.43676e+07	1.66773e+07	1.3912e+07
Gamma-glutamyl phosphate reductase	Q1RFS7	proA	5.64	44.5	1.46965e+07	9.63058e+06	6.85209e+06	1.1988e+07	6.79235e+06	3.96905e+06
Spermidine N(1)-acetyltransferase	Q1RBL5	speG	6.68	21.9	8.24783e+06	5.30552e+06	4.99201e+06	6.72804e+06	5.56758e+06	4.46628e+06
Protein translocase subunit SecY	Q1R631	secY	9.89	48.5	4.13062e+07	3.35535e+07	3.78563e+07	3.35886e+07	3.80925e+07	3.35872e+07
Transcription elongation factor GreA	Q1R6F6	greA	4.79	17.6	1.26628e+06	0	761873	1.0186e+06	555794	1.87672e+06
Molybdopterin biosynthesis protein MoeB	Q1RE99	moeB	5.27	26.7	2.02504e+06	432206	0	1.62965e+06	359241	463858
RNA polymerase sigma-54 factor	Q1R6D2	rpoN	4.75	54	7.81697e+06	2.92492e+06	1.7974e+06	6.32311e+06	5.81797e+06	5.75256e+06
High-affinitygluconate permease	Q1R5L9	gntT	8.24	45.9	2.76773e+06	1.46344e+06	2.35908e+06	2.23991e+06	3.08143e+06	3.89615e+06
Adhesin/virulence factor Hek	Q1R2X9	hek	4.89	27.8	1.63312e+06	1.37757e+06	1.50861e+06	1.32082e+06	2.08099e+06	1.45259e+06
Probable membrane protein	Q1RDT8	ycbC	9.23	28.6	4.26615e+06	3.46394e+06	4.01895e+06	3.44204e+06	3.74619e+06	5.38032e+06
NAD-dependent protein deacylase	Q1RD34	cobB	7.64	30.9	2.21377e+07	1.6539e+07	1.49508e+07	1.7795e+07	1.68421e+07	1.64561e+07
Hypothetical GST-like protein YghU	Q1R706	yghU	7.08	34.2	1.24535e+07	7.38926e+06	4.48166e+06	1.00091e+07	6.42211e+06	5.15856e+06
Pseudouridine synthase	Q1R9N6	rsuA	6.54	29.7	9.58321e+06	3.6309e+06	3.50723e+06	7.72582e+06	2.49775e+06	2.06026e+06
Ribonuclease PH	Q1R4U9	rph	5.5	26.2	6.13818e+06	6.0696e+06	3.63771e+06	4.93074e+06	5.30341e+06	4.58704e+06
Transcriptional repressor of fru operon and others	Q1RGB5	fruR	6.96	38	6.05464e+07	4.93461e+07	2.76195e+07	4.89097e+07	4.487e+07	3.66693e+07
Co-chaperone protein DjlA	Q1RGE2	djlA	9.6	34.1	1.53356e+07	1.33215e+07	9.55211e+06	1.23293e+07	1.8308e+07	1.45253e+07
Elongation factor P	Q1R3B2	efp	5.02	20.6	9.30728e+06	5.02437e+06	3.64986e+06	7.49041e+06	5.26241e+06	3.48261e+06
S-adenosylmethionine synthase	Q1R785	metK	5.26	42.4	5.70357e+07	7.29034e+07	2.38672e+07	4.58623e+07	2.31557e+07	1.25549e+07
7-carboxy-7-deazaguanine synthase	Q1R7S2	ygcF	6.06	25	1.10861e+07	6.22739e+06	3.65601e+06	8.92041e+06	8.41538e+06	3.64862e+06
50S ribosomal protein L13	Q1R6A9	rplM	9.91	16	7.54492e+08	5.71681e+08	6.27951e+08	6.08714e+08	8.5345e+08	8.10378e+08
Anaerobic C4-dicarboxylate transporter	Q1R3E0	dcuB	8.05	48	1.83487e+07	1.50289e+07	1.60779e+07	1.47754e+07	1.59504e+07	1.84192e+07
Periplasmic nitrate reductase	Q1R9L3	napA	8.03	93	5.89909e+06	4.78611e+06	2.59775e+06	4.70452e+06	3.37141e+06	1.42006e+07
Sensor protein EvgS	Q1R8Z6	evgS	6.09	134.8	8.8116e+06	7.38936e+06	1.04732e+07	7.0282e+06	7.60723e+06	3.97432e+09
Outer membrane protein W	Q1RCH8	ompW	6.8	25.9	3.11188e+09	1.56135e+09	2.96877e+09	2.47975e+09	3.19648e+09	3.35741e+09
Uncharacterized protein	Q1R5W5	yjaG	4.6	22.6	5.69631e+07	5.20481e+07	4.04252e+07	4.54489e+07	4.71434e+07	4.93787e+07
Uncharacterized protein	Q1RA63	yeeA	9.29	39.9	7.72281e+06	5.95734e+06	3.08867e+06	6.16301e+06	3.13438e+06	2.33596e+06
UPF0271 protein YbgL	Q1REL0	ybgL	5.58	25.8	3.79622e+06	2.06543e+06	1.57315e+06	3.03399e+06	990745	819203
Probable GTP-binding protein EngB	Q1R448	engB	7.49	23.5	2.4156e+07	2.30484e+07	1.33256e+07	1.92994e+07	1.70698e+07	1.422e+07
Transcriptional regulator AraC	Q1RGD5	araC	6.99	33.9	1.50237e+06	925567	327026	1.2012e+06	510259	579627
Elongation factor Ts	Q1RG19	tsf	5.29	30.4	2.33372e+08	1.90569e+08	1.06189e+08	1.87241e+08	1.53225e+08	1.51556e+08
Putative outer membrane receptor, probably TonB dependent	Q1RCP9	prrA	6.06	74.2	4.88793e+06	4.95692e+06	7.08732e+06	3.92336e+06	7.14597e+06	1.69562e+06
SsrA-binding protein	Q1R8A4	smpB	9.89	18.3	7.77681e+06	6.59016e+06	3.81884e+06	6.24573e+06	5.36436e+06	3.8803e+06
Sialic acid synthase NeuB	Q1R745	neuB	6.62	38.7	2.37761e+08	1.41571e+08	8.44516e+07	1.89923e+08	1.19259e+08	7.42854e+07
Uncharacterized protein	Q1RFP7	ycjY	5.85	33.2	4.04425e+07	2.13702e+07	1.0214e+07	3.1985e+07	9.68072e+06	4.81372e+06
2,5-diketo-D-gluconic acid reductase A	Q1RFP0	UTI89_C0323	5.64	33.2	4.16295e+07	1.49033e+07	1.05635e+07	3.30038e+07	1.72667e+07	8.77883e+06
Membrane-bound lytic murein transglycosylase B	Q1R7Z9	mltB	9.14	44.2	8.86123e+07	6.88085e+07	9.68917e+07	7.04776e+07	1.03772e+08	1.16207e+08
Phosphoenolpyruvate synthase regulatory protein	Q1RB92	ydiA	6.43	31.2	6.29538e+07	3.60261e+07	2.34278e+07	4.9955e+07	3.62026e+07	3.1455e+07
Uncharacterized protein	Q1R496	UTI89_C4401	8.63	31.5	3.74768e+06	1.9418e+06	2.11328e+06	2.98284e+06	1.20453e+06	2.47289e+06
Lysine-specific permease	Q1R9R6	lysP	8.81	53.5	5.49797e+06	3.94619e+06	5.45451e+06	4.37202e+06	4.26371e+06	4.23554e+06
2,3,4,5-tetrahydropyridine-2,6-dicarboxylate N-succinyltransferase	Q1RG24	dapD	6.01	29.9	4.30721e+07	2.6373e+07	2.20227e+07	3.40772e+07	2.18755e+07	1.99582e+07
Isochorismate synthase	Q1REW9	entC	5.59	43.4	8.91136e+06	8.35796e+06	1.73195e+06	7.09884e+06	4.16301e+06	2.26191e+06
ADP compounds hydrolase NudE	Q1R5P0	nudE	4.98	21.1	4.56442e+06	1.35618e+06	926775	3.61576e+06	1.69935e+06	424440
Uncharacterized protein	Q1R7A9	yggB	6.9	30.9	2.25493e+08	9.14505e+07	2.14928e+08	1.7744e+08	2.11547e+08	2.11012e+08
Protein YbiS	Q1REA5	ybiS	6.4	33.3	5.9675e+07	4.62243e+07	1.79153e+07	4.69101e+07	2.33355e+07	1.93002e+07
Putative ligase	Q1RF51	ybaP	6.74	29.9	1.81866e+06	970799	797877	1.43448e+06	1.08678e+06	1.39241e+06
Ribosomal protein L11 methyltransferase	Q1R669	prmA	4.48	31.9	3.74743e+06	2.07971e+06	1.67749e+06	2.95321e+06	2.99519e+06	2.06574e+06
Negative modulator of initiation of replication	Q1REM9	seqA	8.92	25.3	2.32034e+07	2.59967e+07	4.43069e+07	1.82982e+07	4.71022e+07	4.4627e+07
L-serine dehydratase 1	Q1R6M1	tdcG	6.04	48.7	893092	1.3598e+06	287946	701129	0	0
Malate dehydrogenase	Q1R6A3		5.77	32.3	7.67018e+08	6.00403e+08	2.07915e+08	6.0337e+08	3.09401e+08	2.12682e+08
Transaldolase	Q1R8R6	talA	6.27	35.6	6.46985e+08	3.92304e+08	1.8642e+08	5.08983e+08	2.40939e+08	1.72116e+08
Undecaprenyl-phosphate 4-deoxy-4-formamido-L-arabinose transferase	Q1R9G1	UTI89_C2536	7.3	36.2	1.23702e+07	7.71064e+06	1.22599e+07	9.72523e+06	1.4785e+07	9.54285e+06
Transcriptional regulatory protein	Q1RD23	phoP	5.26	25.5	2.23368e+07	1.33353e+07	4.63671e+06	1.75893e+07	1.3961e+07	5.89099e+06
Pseudouridine-5'-phosphate glycosidase	Q1R9Q7	yeiN	5.16	33	3.88416e+07	3.5955e+07	1.41526e+07	3.06031e+07	1.93587e+07	1.75779e+07
50S ribosomal protein L5	Q1R620	rplE; C813_RS16705; C813_RS25010; AB182_RS27795	9.48	20.3	9.50037e+08	6.72913e+08	6.34108e+08	7.48413e+08	7.50052e+08	7.08346e+08
Phosphoribosylglycinamide formyltransferase	Q1R8N8	purN	5.87	23.3	747273	792843	0	584292	630170	446471
FocA formate FNT transporter	Q1RDV4	focA	8.6	44.2	8.62346e+06	1.01916e+07	1.2126e+07	6.71463e+06	1.15121e+07	9.708e+06
Ribose-phosphate pyrophosphokinase	Q1RCN1	prsA	5.74	36.6	5.74437e+08	4.60467e+08	2.24293e+08	4.49514e+08	3.04149e+08	2.16047e+08
Riboflavin biosynthesis protein	Q1RGH7	ribF	9.23	34.7	1.14138e+07	5.81586e+06	1.57186e+06	8.90239e+06	4.85828e+06	1.5487e+06
Hypothetical oxidoreductase YqhD	Q1R6Y6	yqhD	6.13	42.1	9.61465e+07	6.59679e+07	2.45505e+07	7.5251e+07	4.31704e+07	1.85793e+07
Protein YhdH	Q1R686	yhdH	6.42	34.7	4.16353e+08	3.27273e+08	1.4953e+08	3.25337e+08	2.0214e+08	1.46524e+08
50S ribosomal protein L4	Q1R604	rplD; LG71_RS02625; AL524_RS00885	9.73	22.1	3.44942e+08	2.62957e+08	1.95878e+08	2.69439e+08	2.49011e+08	2.75023e+08
Protein YfbT	Q1R9C2	yfbT	6.14	23	888351	0	0	691181	0	197402
UPF0246 protein YaaA	Q1RGJ7	yaaA	8.21	29.6	2.80678e+07	2.2389e+07	7.21351e+06	2.17059e+07	1.02758e+07	7.38855e+06
DnaA regulatory inactivator Hda	Q1R8P2		5.52	26.6	6.778e+06	4.82728e+06	663403	5.24187e+06	3.54661e+06	1.04758e+06
Putative heme/hemoglobin transport protein	Q1R5A8	chuS	5.76	38.6	2.43662e+07	1.92362e+07	6.21445e+06	1.89253e+07	8.87251e+06	6.40643e+06
Putative methyl-independent mismatch repair protein	Q1RAI2	UTI89_C2159	8.56	32.1	6.01754e+06	5.02186e+06	6.12718e+06	4.66579e+06	5.79743e+06	5.34485e+06
Cell division protein DedD	Q1R998	dedD	8.21	23.6	2.01548e+07	2.11184e+07	1.41632e+07	1.56022e+07	1.7011e+07	1.36702e+07
Putative phosphatase	Q1R806	yqaB	5.94	20.8	4.01338e+06	3.48836e+06	2.05711e+06	3.11398e+06	1.77821e+06	701365
Methionine aminopeptidase	Q1RG22	map	5.96	29.3	3.19526e+07	1.88477e+07	1.03386e+07	2.4783e+07	1.52434e+07	1.1671e+07
Oligopeptide transport system permease protein OppB	Q1R9P1	UTI89_C2455	8.25	40.3	1.11047e+06	824096	1.20691e+06	860777	1.48594e+06	993051
Glycine--tRNA ligase alpha subunit	Q1R536	glyQ	5.05	34.7	5.97065e+07	4.19419e+07	1.94277e+07	4.62848e+07	2.61367e+07	2.41478e+07
Putative carboxymethylenebutenolidase	Q1R487	UTI89_C4410	6.1	31.8	4.99346e+06	4.31866e+06	1.6534e+06	3.86887e+06	1.84636e+06	2.00812e+06
Transcriptional regulatory protein RstA	Q1RBJ0	rstA	5.86	28.8	1.91935e+06	1.01368e+06	176042	1.48246e+06	788841	214580
CRP-cAMP transcriptional dual regulator	Q1R5S5	crp; N172_RS07815	8.25	23.6	3.26067e+08	2.27352e+08	2.27963e+08	2.52077e+08	2.70043e+08	2.45196e+08
Beta-lactamase	Q1RAD8	UTI89_C2208	8.03	55.4	233257	238336	0	179246	428472	626734
Transcriptional response regulatory protein BaeR	Q1R9Z2	baeR	5.76	27.6	3.0703e+06	852587	294610	2.36522e+06	1.61542e+06	931537
UPF0502 protein YceH	Q1RD90	yceH	5.06	24.2	2.13948e+07	1.38439e+07	6.94507e+06	1.64811e+07	5.30922e+06	3.82633e+06
Protein YcaC	Q1RDV9	ycaC	6.23	27	7.55521e+06	6.22732e+06	1.14377e+07	5.80371e+06	9.35663e+06	1.11855e+07
Pseudouridine synthase	Q1RC99	yciL	10.02	32.7	4.18595e+07	3.42091e+07	2.30206e+07	3.21571e+07	2.81988e+07	2.4073e+07
Periplasmic murein peptide-binding protein	Q1RC35	mppA	8.7	60.6	2.10771e+07	2.57771e+07	1.42573e+07	1.61903e+07	1.66502e+07	1.19526e+07
Phospholipase A1	Q1R4B3	pldA	5.2	33.1	3.20518e+07	1.99953e+07	2.55397e+07	2.47092e+07	3.42841e+07	3.57303e+07
Phosphoribosylformylglycinamidine cyclo-ligase	Q1R8N9	purM	5.01	36.9	4.32141e+06	4.91811e+06	8.09036e+06	3.32768e+06	1.62353e+06	4.86662e+06
Hydrogenase isoenzymes formation protein HypE	Q1R7W9	hypE	5.17	35	1.55194e+07	8.4412e+06	7.87583e+06	1.18913e+07	9.55514e+06	7.99657e+06
Stable plasmid inheritance protein	Q1R1X6	stbA	5.63	35.6	7.84865e+07	4.27779e+07	3.09692e+07	5.99811e+07	4.87722e+07	4.04975e+07
Superoxide dismutase	Q1RBD9	sodB	5.95	21.3	3.55888e+07	2.81424e+07	3.12798e+07	2.71872e+07	3.94977e+07	3.6476e+07
PTS enzyme IID, mannose-specific	Q1RAX1	manZ	9.06	31.3	2.58711e+08	2.00262e+08	2.33191e+08	1.97115e+08	2.81442e+08	2.4267e+08
Phosphoglycerate kinase	Q1R7A7	pgk	5.39	43.3	4.78298e+08	4.15993e+08	3.29039e+08	3.66402e+08	3.09574e+08	2.82426e+08
ArcA transcriptional dual regulator	Q1R240	arcA	5.33	27.3	2.37273e+08	2.2311e+08	9.11015e+07	1.81447e+08	1.44563e+08	1.03686e+08
AmpE	Q1RG85	ampE	9.61	32.1	1.36034e+07	1.256e+07	1.28986e+07	1.03313e+07	1.51049e+07	1.11611e+07
UDP-galactose-4-epimerase	Q1REH2	UTI89_C0756	6.42	37.2	6.11142e+07	4.51693e+07	1.28098e+07	4.63661e+07	2.6598e+07	9.72636e+06
2,3-bisphosphoglycerate-dependent phosphoglycerate mutase	Q1REH6	gpmA	6.71	29.2	1.16822e+08	1.0433e+08	8.36919e+07	8.85418e+07	1.04109e+08	9.0001e+07
Protein/nucleic acid deglycase HchA	Q1RAH5	hchA	5.73	31.2	4.55918e+06	3.82817e+06	3.06468e+06	3.45458e+06	4.14219e+06	4.8848e+06
Putative 2-component transcriptional regulator	Q1RAM6	uvrY	7.02	23.8	3.32155e+06	3.16651e+06	1.28547e+06	2.50984e+06	2.63012e+06	1.15466e+06
HdeD protein	Q1R593	hdeD	9.61	20.9	2.94063e+07	1.25855e+07	2.10696e+07	2.21328e+07	3.44599e+07	3.18019e+07
Phosphate regulon sensor protein PhoR	Q1RFE2	phoR	9.51	49.6	460941	172567	760976	346880	410507	413679
Putative membrane protein	Q1RCB8	UTI89_C1518	6.28	21.8	9.86582e+06	6.02136e+06	1.42807e+07	7.44197e+06	1.06992e+07	1.36672e+07
Uncharacterized protein	Q1RFR0	yagU	7.02	23	1.50049e+08	1.13066e+08	9.4022e+07	1.12594e+08	1.25595e+08	9.57329e+07
Putative galactosyltransferase WbgM	Q1RA43	wbgM	9.01	41.8	5.90699e+07	3.52849e+07	4.77143e+07	4.45665e+07	5.27769e+07	5.49749e+07
Lipopolysaccharide core biosynthesis protein rfaY	Q1R4W6	rfaY	9.55	27	9.05537e+06	5.28056e+06	4.38306e+06	6.83244e+06	7.69893e+06	6.04319e+06
Guanylate kinase	Q1R4U3		6.54	23.6	1.39229e+07	8.81284e+06	4.92325e+06	1.04376e+07	5.8898e+06	2.49187e+06
CysQ protein	Q1R337	cysQ	5.96	27.2	7.12771e+07	5.24046e+07	2.50809e+07	5.33992e+07	3.49197e+07	2.2519e+07
Deoxyribose-phosphate aldolase	Q1R262	deoC	5.43	28.6	3.33466e+07	2.16247e+07	1.16451e+07	2.50957e+07	1.40843e+07	1.16709e+07
Uncharacterized protein	Q1RDR2	ymbA	6.1	20.6	4.47129e+07	1.46681e+07	5.38286e+07	3.34903e+07	4.28665e+07	6.37422e+07
NeuE protein	Q1R748	neuE	9.11	44.8	3.51613e+06	890340	2.30714e+06	2.62398e+06	2.75396e+06	2.22943e+06
RNA polymerase sigma factor	Q1R8F9	rpoE	5.35	23	7.64376e+06	3.74602e+06	5.72545e+06	5.7248e+06	8.14392e+06	8.6042e+06
Arginine 3rd transport system permease protein	Q1RE63	artQ	9.13	26.2	7.82508e+06	3.01592e+06	7.19792e+06	5.85908e+06	9.196e+06	6.81405e+06
Uncharacterized protein	Q1RBY5	UTI89_C1651	8.32	24.4	9.70459e+07	7.81114e+07	1.16797e+08	7.22347e+07	1.15465e+08	1.21669e+08
Uncharacterized protein	Q1RB67	yniC	4.93	24.3	4.97699e+06	1.34498e+07	2.31228e+06	3.7158e+06	3.15606e+06	752163
Putative oxidoreductase	Q1R9T5	UTI89_C2411	6	27	1.18319e+06	1.07185e+06	455661	881482	0	544577
Peptide methionine sulfoxide reductase MsrA	Q1R333	msrA	5.02	25.7	7.9299e+07	5.62795e+07	3.04988e+07	5.91914e+07	3.12834e+07	2.57386e+07
Psp operon transcriptional activator	Q1RC63	pspF	5.83	37.5	4.58449e+06	2.28006e+06	444618	3.42992e+06	425743	126338
Ribonuclease 3	Q1R8G6	rnc	6.89	25.5	2.25295e+07	1.85876e+07	1.49447e+07	1.67525e+07	1.6437e+07	1.34616e+07
Uncharacterized protein	Q1R3C5	yjdC	5.03	22.8	1.44281e+06	744463	724699	1.07318e+06	0	812602
Positive transcriptional regulator for cysteine regulon	Q1RC92	cysB	7.42	36.1	3.01125e+07	1.55781e+07	1.38028e+07	2.24852e+07	2.11159e+07	1.27892e+07
Hex regulon repressor	Q1RAT1	yebK	6.65	32	1.50715e+06	852409	562445	1.12291e+06	487268	600861
2-dehydro-3-deoxyphosphooctonate aldolase	Q1RCM3	kdsA	6.8	30.8	2.58685e+08	1.68377e+08	7.14411e+07	1.92627e+08	9.94942e+07	6.27713e+07
Fructose-specific PTS system IIA component	Q1R9Q2	UTI89_C2444	4.94	39.7	1.50584e+07	7.97348e+06	9.50564e+06	1.12609e+07	9.41458e+06	1.13498e+07
Putative glycosyltransferase	Q1RA41	UTI89_C2305	8.35	30.6	4.63704e+06	3.34872e+06	2.40236e+06	3.43589e+06	4.29244e+06	3.31869e+06
Putative dehydrogenase	Q1RC08	UTI89_C1628	5.92	30.7	6.30157e+07	3.91489e+07	2.33319e+07	4.6683e+07	2.46421e+07	1.68598e+07
Hypothetical oxidoreductase YbiC	Q1REC4	ybiC	6.39	38.8	6.20484e+07	2.91618e+07	2.02676e+07	4.59833e+07	3.10523e+07	2.55615e+07
Replication protein RepFIB (P307 replicon)	Q1R1Y8	UTI89_P050	9.67	37.3	2.37148e+06	711007	0	1.7537e+06	0	0
Probable transcriptional regulatory protein YeeN	Q1RAE7	yeeN	4.82	25.9	6.69807e+06	4.07422e+06	2.97658e+06	4.96389e+06	3.48516e+06	3.35906e+06
Bifunctional purine biosynthesis protein PurH	Q1R5X1	purH	5.78	57.3	7.53948e+06	3.9932e+06	4.91167e+06	5.59989e+06	2.53035e+06	892585
Protoporphyrinogen oxidase	Q1R462	hemG	9.67	21.2	2.16892e+07	1.17464e+07	1.38265e+07	1.61024e+07	1.70819e+07	2.15993e+07
Phosphoserine aminotransferase	Q1RDV1	serC	5.36	39.7	1.64455e+07	1.10167e+07	5.87603e+06	1.216e+07	2.7052e+06	715520
Formate dehydrogenase-O, cytochrome B556 (FDO) subunit	Q1R423	fdoI	10.2	24.6	1.24811e+06	1.28754e+06	1.62051e+06	922536	1.06905e+06	1.087e+06
4-hydroxy-tetrahydrodipicolinate synthase	Q1R8P9	dapA	6.68	32	1.71676e+07	1.32353e+07	5.04652e+06	1.27612e+07	9.33841e+06	8.38024e+06
Trehalose-6-phosphate hydrolase	Q1R317	treC	5.77	63.8	8.81653e+06	1.00735e+07	3.48524e+06	6.54327e+06	1.51749e+06	538494
Uncharacterized protein	Q1R4M1	yieF	5.15	20.4	304545	238751	974027	223812	523953	425055
Uncharacterized protein	Q1RC38	UTI89_C1598	6.21	23.3	5.25369e+06	3.84743e+06	2.08868e+06	3.86467e+06	2.52879e+06	938018
Hypothetical transcriptional regulator YqhC	Q1R6Y7	yqhC	8.32	42.5	2.32994e+06	2.62971e+06	195367	1.71307e+06	1.95507e+06	223218
Putative LysR-like transcriptional regulator	Q1RFP6	UTI89_C0317	6.24	36.9	859002	303218	310735	629859	153879	409927
DnaC protein	Q1R2E4	dnaC	8.98	27.9	4.1503e+06	2.88246e+06	773013	3.04334e+06	408839	774890
RNase adapter protein RapZ	Q1R6C9	yhbJ	7.24	32.5	3.52277e+07	2.03675e+07	1.45234e+07	2.59545e+07	1.84657e+07	1.7721e+07
Riboflavin synthase alpha chain	Q1RBD3	ribC	5.99	23.4	1.72763e+07	9.96908e+06	4.62685e+06	1.27132e+07	7.57277e+06	3.49611e+06
Aminotransferase	Q1RDS9	aspC	5.77	43.5	5.42912e+08	4.27798e+08	1.83928e+08	4.00401e+08	2.02892e+08	1.28184e+08
3-dehydroquinate synthase	Q1R5P8	aroB	5.86	38.8	3.37595e+07	2.62672e+07	6.76529e+06	2.47885e+07	7.53818e+06	5.46965e+06
UPF0304 protein YfbU	Q1R9C1	UTI89_C2576	6.28	20.2	2.15962e+08	1.29636e+08	6.39164e+07	1.5756e+08	8.58356e+07	5.22266e+07
tRNA (guanine-N(7)-)-methyltransferase	Q1R766	trmB	6.92	27.3	1.61012e+07	4.9291e+06	5.42381e+06	1.17298e+07	2.97997e+06	2.53873e+06
Uroporphyrinogen decarboxylase	Q1R5W3	hemE	6.3	39.2	1.77752e+07	1.29541e+07	4.14392e+06	1.29586e+07	5.65257e+06	2.88627e+06
Uncharacterized protein	Q1R9B2	yfcF	5.44	24.3	1.16997e+07	5.84804e+06	6.69672e+06	8.56732e+06	5.25082e+06	7.53459e+06
L-threonine 3-dehydrogenase	Q1R4X4	tdh	6.38	37.3	6.02455e+06	2.72099e+06	2.91435e+06	4.40888e+06	3.95035e+06	3.93735e+06
Aspartate carbamoyltransferase	Q1R309	pyrB	6.61	34.4	1.25888e+07	1.00912e+07	7.94197e+06	9.21996e+06	1.06499e+07	8.69682e+06
Ubiquinone biosynthesis O-methyltransferase	Q1R9I4	ubiG	6.6	26.5	5.01793e+06	1.97155e+06	593598	3.67453e+06	306536	0
Phospho-2-dehydro-3-deoxyheptonate aldolase	Q1REH7	aroG	6.47	38	2.60062e+07	1.39794e+07	9.33345e+06	1.89285e+07	6.68767e+06	6.19923e+06
Transcriptional regulator ModE	Q1REH0	modE	5.44	28.2	1.84529e+06	0	0	1.33452e+06	453785	474534
GTP cyclohydrolase 1	Q1R9R9	folE	7.33	24.8	476056	0	388732	345625	1.01782e+06	573298
Uncharacterized protein	Q1R2V1	UTI89_C4910	5.52	14.7	1.46051e+07	8.73983e+06	5.21428e+06	1.05841e+07	8.08524e+06	6.22182e+06
Uncharacterized protein	Q1R2N1	UTI89_C4980	7.24	33.7	4.15201e+06	2.56383e+06	1.43191e+06	2.99941e+06	2.07495e+06	2.03759e+06
NADPH-dependent 7-cyano-7-deazaguanine reductase	Q1R7P8	queF	6.29	32.6	1.59763e+07	9.89665e+06	1.60701e+06	1.15998e+07	4.15314e+06	1.21314e+06
Putative UTP--glucose-1-phosphate uridylyltransferase	Q1RA32	galF	5.59	33.3	3.01186e+07	2.40401e+07	14343922	2.18421e+07	1.45277e+07	1.49574e+07
Uncharacterized protein	Q1RAE0	UTI89_C2206	8.53	19.6	3.525e+08	1.75474e+08	1.25995e+08	2.52859e+08	1.50697e+08	1.0925e+08
Cell division protein ZapD	Q1RG94	yacF	6.79	28.3	1.30986e+07	3.11276e+06	5.48416e+06	9.42315e+06	5.57805e+06	6.00172e+06
ATP-dependent Clp protease proteolytic subunit	Q1RF98	clpP	5.8	23.2	3.28837e+07	2.5385e+07	1.45034e+07	2.37338e+07	1.70266e+07	1.33446e+07
ATP-dependent protease subunit HslV	Q1R3Y5	hslV	6.39	19.1	5.75129e+06	5.71462e+06	5.80589e+06	4.13809e+06	4.44836e+06	5.02892e+06
Hydrogenase maturation factor	Q1R7X0	hypD	5.99	41.3	994550	690196	564969	717280	451530	215114
Nickel-binding periplasmic protein	Q1R5E2	nikA	6.19	58.7	2.12343e+07	1.83741e+07	8.51495e+06	1.52903e+07	6.0695e+06	1.62824e+06
L-asparaginase II	Q1R770	ansB	6.04	36.9	6.71627e+07	6.10682e+07	2.84777e+07	4.81747e+07	3.37157e+07	3.00921e+07
Tryptophan--tRNA ligase	Q1R5Q3	trpS	6.74	37.4	4.33365e+07	3.52669e+07	9.30955e+06	3.11103e+07	1.96531e+07	1.30116e+07
Ubiquinone/menaquinone biosynthesis C-methyltransferase UbiE	Q1R477	ubiE	7.99	28.1	7.16642e+07	5.62385e+07	4.57863e+07	5.15775e+07	4.93788e+07	4.18584e+07
5'-methylthioadenosine/S-adenosylhomocysteine nucleosidase	Q1RG29	mtn	5.25	24.3	1.41498e+07	5.46501e+06	7.66897e+06	1.02041e+07	6.75491e+06	3.00463e+06
Glucosamine-6-phosphate deaminase	Q1REP9	nagB	6.9	29.8	6.81737e+07	3.16796e+07	1.75463e+07	4.90531e+07	2.08291e+07	1.31481e+07
Nitrogen regulation protein NR(II)	Q1R444	glnL	5.78	38.5	5.18747e+06	2.65364e+06	2.38379e+06	3.73378e+06	2.54379e+06	2.24939e+06
Transcriptional regulatory protein basR/PmrA	Q1R3E9	basR	6.01	25	7.66064e+06	1.41437e+06	3.79246e+06	5.51454e+06	2.46053e+06	4.3889e+06
2-octaprenyl-6-methoxyphenol hydroxylase	Q1R7C3	ubiH	7.61	42.4	9.95673e+06	8.52893e+06	3.41701e+06	7.1513e+06	4.88213e+06	2.25225e+06
Putative lipoprotein AcfD-like	Q1R728	yghJ	5.02	167.2	2.71904e+07	2.16755e+07	2.26128e+07	1.93772e+07	8.74207e+06	4.04668e+06
Uncharacterized protein	Q1REC5	ybiB	6.86	35.1	3.12121e+07	1.58748e+07	1.13414e+07	2.23086e+07	1.19349e+07	1.07571e+07
Peptidyl-tRNA hydrolase	Q1RCN4	pth	9	21.1	2.4881e+07	1.31016e+07	1.2302e+07	1.776e+07	1.24076e+07	1.01957e+07
Pyruvate formate-lyase-activating enzyme	Q1RDV6	pflA	6.65	29.3	9.87194e+06	3.85514e+06	4.39876e+06	7.0516e+06	5.82107e+06	4.75039e+06
ATPase component of SufB-SufC-SufD cysteine desulfurase (SufS) activator complex	Q1RBB4	sufC	4.98	27.6	7.17999e+07	4.33853e+07	2.11334e+07	5.12323e+07	2.81096e+07	2.59922e+07
HTH-type transcriptional repressor AllR	Q1RF28	ybbU	6.14	29.3	1.45024e+06	1.11679e+06	288548	1.03297e+06	590898	563318
Single-stranded DNA-binding protein	Q1R3L1	ssb	5.63	21.5	9.79319e+06	6.97682e+06	5.28259e+06	6.97225e+06	6.31048e+06	5.98236e+06
50S ribosomal protein L6	Q1R624	rplF	9.7	18.9	5.07334e+08	3.78299e+08	2.73593e+08	3.62101e+08	3.53561e+08	2.99571e+08
Cell filamentation protein fic	Q1R5S1	fic	5.29	23.1	4.75882e+07	4.1681e+07	3.18332e+07	3.36864e+07	2.34167e+07	2.39014e+07
Putative alpha helix protein	Q1R4U8	yicC	5.12	33.2	5.07774e+07	3.05714e+07	1.94536e+07	3.59078e+07	2.07777e+07	1.89761e+07
Uncharacterized protein	Q1R9P6	yeiR	6.4	36	3.44432e+06	1.43555e+06	829760	2.43562e+06	1.53099e+06	1.13245e+06
Lysophospholipase L2	Q1R4A8	pldB	7.74	38.9	6.43081e+06	3.74271e+06	4.16177e+06	4.55422e+06	4.7402e+06	5.03567e+06
TolQ protein	Q1REI8	tolQ	7.06	25.6	4.51851e+07	2.51995e+07	3.14792e+07	3.21307e+07	4.31126e+07	3.81425e+07
Transcriptional regulatory protein CpxR	Q1R406	cpxR	5.66	26.3	2.78491e+07	1.71582e+07	9.95221e+06	1.97273e+07	1.54255e+07	1.09828e+07
YcfD protein	Q1RD25	UTI89_C1257	4.83	42.9	2.58273e+06	1.77889e+06	1.07375e+06	1.82483e+06	243826	45242.7
Uncharacterized protein	Q1RAA4	UTI89_C2242	7.64	31.1	3.05725e+06	2.20796e+06	3425057	2.15703e+06	3.64872e+06	3.28398e+06
Uncharacterized protein	Q1REE2	ybhL	9.61	25.9	8.52027e+06	1.03065e+07	6481076	6.00946e+06	9.42484e+06	7.75315e+06
Sulfate transporter CysZ	Q1R8V8	cysZ	9.5	29.3	3.50502e+06	2.16929e+06	4.59714e+06	2.47434e+06	3.36135e+06	2.89186e+06
Nucleoside permease	Q1R8X3	nupC	8.34	44.8	3.10562e+07	1.40616e+07	2.76166e+07	2.18969e+07	2.65999e+07	2.41972e+07
Sulfurtransferase	Q1R8L1	sseA	5.12	37	1.51016e+08	1.32626e+08	4.14006e+07	1.06435e+08	5.87035e+07	3.78608e+07
Glutamate decarboxylase	Q1R586	gadA	5.58	55.2	1.05387e+09	9.69431e+08	5.1357e+08	7.41473e+08	3.68183e+08	2.25423e+08
Uncharacterized protein	Q1RB69	yniA	5.16	32.5	2.34909e+08	1.24938e+08	7.85153e+07	1.6406e+08	1.14606e+08	7.29287e+07
Protein MtfA	Q1RAG7		4.77	30.3	6.71341e+06	2.93905e+06	1.85068e+06	4.70633e+06	4.71015e+06	2.5284e+06
Uncharacterized protein	Q1R2Z2	yjgP	9	40.3	1.09299e+07	7.46628e+06	8.83542e+06	7.66172e+06	1.12587e+07	1.18209e+07
NAD(P)H-flavin reductase	Q1R468	fre	6.24	27.7	3.42913e+07	1.7525e+07	1.2321e+07	2.39809e+07	1.4563e+07	1.0938e+07
Sialic acid synthase NeuD	Q1R744	neuD	9.01	22.7	5.95152e+07	3.11864e+07	3.16403e+07	4.13194e+07	4.25408e+07	3.29916e+07
Uncharacterized protein	Q1R392	yjeE	4.65	16.9	5.3194e+06	2.23561e+06	1.9654e+06	3.68432e+06	2.67172e+06	1.84464e+06
Maltose/maltodextrin import ATP-binding protein MalK	Q1R3Q1		6.7	41	2.7982e+08	2.12685e+08	2.81494e+08	1.9413e+08	2.53592e+08	1.56682e+08
Aminomethyltransferase	Q1R7C6	gcvT	5.57	40.1	2.03296e+08	1.71587e+08	7.8905e+07	1.40875e+08	7.83105e+07	5.32016e+07
Uncharacterized protein	Q1RDT9	ycbJ	7.08	34.4	5.06734e+07	2.1464e+07	1.26856e+07	3.49607e+07	2.32437e+07	1.20885e+07
Flavodoxin NADP+ reductase	Q1R3Z4	fpr	6.3	27.7	2.69885e+06	2.58092e+06	492985	1.85756e+06	2.13736e+06	288565
Phosphate import ATP-binding protein PstB	Q1R4L0	pstB	6.55	29	1.58496e+07	7.44618e+06	1.00597e+07	1.09574e+07	1.09469e+07	1.05181e+07
ATP-dependent 6-phosphofructokinase	Q1R403	pfkA	6.46	38.7	1.5426e+08	1.27843e+08	4.87534e+07	1.06371e+08	5.85511e+07	4.68091e+07
D-cysteine desulfhydrase	Q1RAM1	UTI89_C2120	5.05	35.2	2.9121e+06	174245	2.08879e+06	1.99102e+06	1.37496e+06	945082
Uncharacterized protein	Q1RFZ8	yaeQ	5.11	20.8	1.35004e+06	380167	406924	921675	404637	240106
DnaA initiator-associating protein DiaA	Q1R6J2	yraO	5.76	21.1	710938	378951	554318	486959	624722	662395
Putative polyketide synthase	Q1RAC5	UTI89_C2221	5.53	95	3.06922e+07	2.56877e+07	1.18565e+07	2.10822e+07	9.33135e+06	945753
Hydrogenase-2 operon protein HybA	Q1R6Z9	hybA	7.37	36	2.92377e+07	2.27791e+07	2.76199e+07	2.00375e+07	3.91646e+07	3.57817e+07
Hypothetical transcriptional regulator YhaJ	Q1R6M6	yhaJ	6.44	33.2	1.29525e+07	9.32072e+06	5.49929e+06	8.87428e+06	8.46095e+06	6.97015e+06
Curved DNA-binding protein	Q1RDL6	cbpA	6.81	34.5	3.44043e+08	2.35721e+08	1.09731e+08	2.35978e+08	1.08196e+08	1.13912e+08
Low-specificity L-threonine aldolase	Q1RE55	ybjU	6.73	36.5	5.84959e+07	3.3948e+07	1.77937e+07	4.01404e+07	2.56628e+07	2.16754e+07
3-oxoacyl-[acyl-carrier-protein] synthase 3	Q1RD66	fabH	5.25	33.5	3.4837e+07	2.14367e+07	1.09873e+07	2.38086e+07	1.42902e+07	9.53584e+06
Periplasmic chaperone protein FimC	Q1R2J8	fimC	9.45	26.6	1.0079e+07	1.12261e+07	7.30255e+06	6.86686e+06	6.61751e+06	3.58743e+06
Uncharacterized protein	Q1RC32	ydaA	5.31	35.7	2.56056e+08	1.47837e+08	1.03922e+08	1.74317e+08	1.18763e+08	1.03748e+08
NADPH 2,4-dienoyl-CoA reductase	Q1R6P7	ygjL	6.54	72.5	2.4101e+07	1.18447e+07	8.92715e+06	1.64439e+07	1.19502e+07	5.93556e+06
HTH-type transcriptional repressor FabR	Q1R3U4		9.35	24.4	1.61243e+07	7.23564e+06	4.94309e+06	1.09384e+07	6.42021e+06	5.34916e+06
Fe/S biogenesis protein NfuA	Q1R5M0	yhgI	4.64	21	2.18287e+06	3.34467e+06	1.26678e+06	1.48214e+06	978820	1.02995e+06
Thymidylate synthase	Q1R7I6	thyA	6.02	30.5	4.06661e+07	2.12574e+07	1.2908e+07	2.762e+07	1.41427e+07	1.34662e+07
C4-dicarboxylate transport protein	Q1R575	dctA	8.75	45.4	3.16154e+06	368149	375160	2.13687e+06	2.29457e+06	912109
Protein-methionine-sulfoxide reductase catalytic subunit MsrP	Q1RAH1	yedY	9.16	37.3	6.55815e+06	3.2211e+06	1.31378e+06	4.4398e+06	3.39297e+06	3.71712e+06
Putative F17-like fimbrial subunit	Q1R2V4	UTI89_C4907	5.45	18.9	1.81691e+06	1.0458e+06	1.48549e+06	1.22505e+06	1.61552e+06	1.57301e+06
Putative regulator	Q1R6Y1	UTI89_C3436	6.83	29.2	1.36244e+06	514083	623799	920452	709767	530706
Outer membrane porin protein NmpC	Q1RAK8	UTI89_C2133	4.7	37.8	9.51446e+08	8.14507e+08	9.90256e+08	6.44532e+08	8.75791e+08	9.04897e+08
Probable phosphoglycerate mutase GpmB	Q1R246	gpmB	5.34	24	8.51385e+06	6.49066e+06	2.66092e+06	5.77143e+06	2.06055e+06	309123
Transaldolase	Q1RGJ5	talB	5.4	37.4	4.84437e+08	3.40094e+08	1.09683e+08	3.27004e+08	1.32093e+08	9.44212e+07
2-dehydropantoate 2-reductase	Q1RFB5	apbA	6	33.8	2.50607e+06	0	582290	1.68539e+06	247770	0
50S ribosomal protein L3 glutamine methyltransferase	Q1R982	prmB	5.41	47.9	4.26572e+07	2.04077e+07	1.13101e+07	2.8647e+07	1.27891e+07	1.03035e+07
23S rRNA (guanosine-2'-O-)-methyltransferase RlmB	Q1R380	yjfH	6.64	26.5	1.84719e+07	1.71319e+07	1.40882e+07	1.24041e+07	1.52746e+07	1.25921e+07
HTH-type transcriptional regulator HdfR	Q1R4H3	hdfR	7.56	31.8	1.01981e+07	4.71813e+06	5.12643e+06	6.86664e+06	6.47472e+06	5.10203e+06
N-acetylmuramic acid 6-phosphate etherase	Q1R8U4	murQ	5.72	31.1	6.60293e+06	3.78792e+06	1.55174e+06	4.42092e+06	2.78981e+06	2.27625e+06
1,4-dihydroxy-2-naphthoyl-CoA synthase	Q1R9F2	menB	6.42	31.6	2.13832e+08	1.5605e+08	6.59498e+07	1.43847e+08	7.67124e+07	5.90298e+07
Subunit of oxygen-insensitive NADPH nitroreductase	Q1RE74	nfsA	6.34	26.8	2.50898e+07	1.5555e+07	5.23019e+06	1.6851e+07	5.20705e+06	2.37963e+06
Nitrite reductase [NAD(P)H] large subunit	Q1R5R6	nirB	6.15	93	5.67308e+06	4.71862e+06	624146	3.8115e+06	898216	47191
Acyl carrier protein phosphodiesterase	Q1RFD7	yajB	6.16	25.1	1.33295e+06	719484	848949	896426	1.03878e+06	270776
Xanthine phosphoribosyltransferase	Q1RFT3	gpt	6.19	17	3.07668e+06	2.107e+06	992488	2.06795e+06	1.96441e+06	1.31007e+06
Recombination-associated protein RdgC	Q1RFE9	rdgC	5.67	36.7	3.1406e+07	1.94369e+07	8.54205e+06	2.10073e+07	1.23176e+07	8.54003e+06
Ribosomal RNA small subunit methyltransferase D	Q1R5F5	rsmD	6.34	21.7	7.26456e+06	7.19879e+06	4.87116e+06	4.82748e+06	3.99469e+06	3.22615e+06
Fermentative D-lactate dehydrogenase, NAD-dependent	Q1RC13	ldhA	5.44	36.5	1.66157e+07	9.52886e+06	5.40755e+06	1.10768e+07	4.37025e+06	3.7934e+06
Ribosomal-protein-alanine acetyltransferase	Q1RD91	rimJ	9.14	22.7	1.29996e+07	3.03017e+06	6.11307e+06	8.59789e+06	9.04476e+06	6.32191e+06
Ebg operon repressor	Q1R6Q3	ebgR	6.3	36.2	184496	0	0	121913	77280.6	0
Cytochrome c-type biogenesis protein	Q1R9M5	ccmH	7.28	39.1	1.36174e+07	1.2358e+07	9.82776e+06	9.00904e+06	1.55409e+07	9.81353e+06
Outer membrane porin protein NmpC	Q1RCY1	nmpC	5.5	41.9	2.28827e+10	1.92528e+10	2.5972e+10	1.51412e+10	1.80591e+10	2.04802e+10
Periplasmic glutamine-binding protein permease	Q1REB4	glnH	8.51	27.2	2.82706e+07	2.18511e+07	2.44855e+07	1.87758e+07	1.89603e+07	1.72326e+07
Uroporphyrinogen-III synthase	Q1R4D4	hemD	6.79	27.8	2.72735e+07	1.56745e+07	7.41752e+06	1.80513e+07	1.41875e+07	8.93001e+06
Uncharacterized protein	Q1RB88	ydiV	5.69	27.2	1.38554e+06	0	0	913971	721092	616824
Flavodoxin 1	Q1REN2	fldA	4.49	24.4	408082	423102	677722	268270	520583	1.5154e+06
Ferrichrome transport ATP-binding protein FhuC	Q1RG37	fhuC	8.72	32.8	1.9269e+06	812723	1.7737e+06	1.26587e+06	1.86637e+06	2.57868e+06
DNA protection during starvation protein	Q1REB2		6.11	18.7	2.77892e+09	6.19599e+09	1.15079e+10	1.82777e+09	1.13141e+10	1.55927e+10
tRNA pseudouridine synthase A	Q1R994	truA	8.54	30.4	2.00184e+06	688447	334427	1.31903e+06	0	329943
Periplasmic AppA protein	Q1RDN1	appA	6.79	48.6	5.6961e+07	3.64992e+07	1.41494e+07	3.74394e+07	1.32401e+07	2.79492e+06
Pyrroline-5-carboxylate reductase	Q1RFF8	proC	6.3	32.3	3.5967e+07	2.2103e+07	1.29946e+07	2.37161e+07	1.35113e+07	1.07468e+07
Glucokinase	Q1R8X8	glk	6.52	34.7	6.42411e+07	3.65595e+07	1.78331e+07	4.22935e+07	2.93431e+07	1.8396e+07
Putative transferase	Q1R6M8	yqjG	6.76	37.4	2.79542e+06	1.52004e+06	1.06147e+06	1.83237e+06	1.27121e+06	626682
Pyruvate dehydrogenase complex repressor	Q1RG79	pdhR	6.47	30.6	2.79449e+06	2.05413e+06	506396	1.82539e+06	2.0691e+06	144792
Transcriptional regulator KdgR	Q1RAW0	kdgR	5.43	30	3.39706e+07	9.86947e+06	9.18706e+06	2.22756e+07	7.99215e+06	4.75121e+06
Exu regulon transcriptional regulator	Q1R6N6	exuR	5.76	30.3	1.35936e+07	8.70466e+06	3.37984e+06	8.87229e+06	6.78961e+06	4.87776e+06
Altronate hydrolase	Q1R6N9	uxaA	5.59	54	2.38295e+06	1.41992e+06	0	1.55748e+06	413408	0
Erythronate-4-phosphate dehydrogenase	Q1R992	pdxB	6.67	41.3	3.214e+07	2.03008e+07	7.3201e+06	2.10734e+07	8.34886e+06	4.22728e+06
o-succinylbenzoate synthase	Q1R9F3	menC	5.06	35.4	2.50271e+06	1.44455e+06	193199	1.63743e+06	459834	0
Ferric enterobactin transport ATP-binding protein fepC	Q1REX4	fepC	6.68	29.8	698801	389293	0	454797	360640	386589
Transport permease protein	Q1RED5	ybhR	9.04	41.5	2.968e+07	7.68232e+06	1.16479e+07	1.92926e+07	1.63141e+07	1.37111e+07
tRNA pseudouridine synthase D	Q1R7U6	truD	6.27	39.1	3.10957e+07	2.20864e+07	7.51985e+06	2.02485e+07	9.2793e+06	2.07183e+06
HTH-type transcriptional regulator ArgP	Q1R7B4	iciA	6.87	33.5	8.68896e+06	4.82211e+06	4.17709e+06	5.62767e+06	5.85504e+06	3.9029e+06
Enterotoxin TieB protein	Q1R208	senB	8.43	48.2	4.95876e+06	4.239e+06	1.07454e+06	3.22645e+06	469348	233378
Outer membrane protein N	Q1RC18	ompN	4.68	41.2	340405	263099	948977	221453	390598	326615
Glutathione synthetase	Q1R780	gshB	5.16	35.6	1.7075e+06	1.48573e+06	856055	1.10885e+06	1.44448e+06	1.23057e+06
Triosephosphate isomerase	Q1R3Z9	tpiA	5.96	27	1.05934e+08	6.63264e+07	4.62244e+07	6.86375e+07	4.11702e+07	3.59799e+07
Positive regulator of gcv operon	Q1R7N2	gcvA	8.95	34.4	9.36601e+06	2.5203e+06	2.11661e+06	6.05441e+06	5.72861e+06	4.00327e+06
Outer membrane protein 3b (A), protease VII	Q1REZ8	ompT	5.78	35.5	2.66744e+08	2.80875e+08	3.36798e+08	1.72471e+08	2.28409e+08	2.44638e+08
tRNA (cytidine/uridine-2'-O-)-methyltransferase TrmJ	Q1R238	lasT	6.54	26.1	3.71075e+06	1.76121e+06	1.55445e+06	2.39971e+06	1.37492e+06	959188
tRNA dimethylallyltransferase	Q1R389	miaA	6.19	35	4.659e+07	2.591e+07	1.41742e+07	2.99944e+07	1.90843e+07	1.98071e+07
3-deoxy-manno-octulosonate cytidylyltransferase	Q1RDU0	kdsB	5.66	27.6	3.66436e+06	3.79121e+06	1.51859e+06	2.36554e+06	1.21413e+06	2.39365e+06
Malonyl CoA-acyl carrier protein transacylase	Q1RD65	fabD	5.03	32.4	4.4319e+07	3.71382e+07	8.06876e+06	2.85278e+07	1.00664e+07	7.59831e+06
Oxygen-insensitive NAD(P)H nitroreductase	Q1REY6	nfnB	5.81	24	2.15153e+07	1.68778e+07	2.63279e+06	1.38692e+07	3.93289e+06	1.34781e+06
Nitrate/nitrite response regulator protein NarP	Q1R9M6	narP	4.98	24.8	1.87689e+06	1.33432e+06	892836	1.21341e+06	986479	1.18711e+06
Uncharacterized protein	Q1R4P0	yidA	5.26	29.7	1.12901e+07	6.43711e+06	1671569	7.25528e+06	2.39425e+06	2.48498e+06
Chorismate pyruvate-lyase	Q1R3P7	ubiC	7.2	18.8	4.38935e+06	2.6305e+06	1.7362e+06	2.8183e+06	2.76163e+06	2.08869e+06
Alkyl hydroperoxide reductase, C22 subunit detoxification of hydroperoxides	Q1REV6	ahpC	5.17	20.7	2.08997e+08	1.43099e+08	8.92766e+07	1.32026e+08	7.84675e+07	7.1973e+07
Endonuclease V	Q1R5W4	nfi	8.28	24.7	5.42097e+06	2.68911e+06	909574	3.42735e+06	1.61978e+06	931096
Diaminopimelate epimerase	Q1R4C5	dapF	6.28	30.3	817779	0	0	515767	420645	394744
Hydrogenase-1 operon protein HyaF	Q1RDN5	hyaF	4.78	31.4	3.86562e+06	3.43204e+06	1.07081e+06	2.43415e+06	1.68319e+06	2.0388e+06
D-serine dehydratase 2	Q1R2Q6	UTI89_C4955	5.77	47.9	5.5989e+06	3.09026e+06	1.28544e+06	3.51303e+06	1.86417e+06	109640
Adenine phosphoribosyltransferase	Q1RF67		5.41	19.8	6.68599e+06	4.0844e+06	2.27907e+06	4.21326e+06	1.74283e+06	1.76246e+06
Cytidylate kinase	Q1RDU8	cmk	5.85	24.7	1.81237e+07	1.21912e+07	1.40791e+07	1.13644e+07	1.13088e+07	1.61506e+07
Sensor kinase-phosphotransferase basS/PmrB	Q1R3F0	basS	6.61	41.3	3.26613e+06	909572	3.28995e+06	2.05259e+06	1.75211e+06	1.85287e+06
ATP synthase subunit a	Q1R4J4	atpB	6.96	30.3	2.92915e+07	1.28099e+07	1.82469e+07	1.82936e+07	2.85048e+07	2.59195e+07
Qor subunit of quinone oxidoreductase	Q1R3N7	qor	8.79	35.2	2.99617e+07	1.82472e+07	1.1507e+07	1.86878e+07	1.57108e+07	1.56023e+07
Uncharacterized protein	Q1RFL9	yahA	6.52	41	2.13656e+06	857702	887466	1.33829e+06	0	409277
Copper homeostasis protein CutC	Q1RAR0	UTI89_C2078	6.15	26.7	3.71262e+06	2.68471e+06	1.34208e+06	2.32319e+06	1.70419e+06	442397
Glucose-1-phosphate thymidylyltransferase	Q1R4E8	rffH	5.43	32.7	894613	0	0	556166	0	263755
Putative response regulator	Q1R2T0	UTI89_C4931	7.01	27.6	1.29498e+06	0	311262	804258	912158	560811
Putative permease PerM	Q1R8P6	perM	8.76	39.1	3.67822e+06	2.62003e+06	3.15107e+06	2.27316e+06	3.28712e+06	2.22936e+06
Transcription antitermination protein RfaH	Q1R470	rfaH	8.44	18.3	1.10368e+06	1.84612e+06	824568	681295	0	392331
Fatty acid metabolism regulator protein	Q1RCQ9	fadR	7.02	27	1.12568e+07	7.38549e+06	4.53401e+06	6.94077e+06	6.92352e+06	4.69444e+06
Translation initiation factor IF-3	Q1RB77	infC	9.23	16.6	2.26283e+07	1.6493e+08	3.32185e+07	1.39639e+07	3.84066e+07	3.42547e+07
tRNA U34 carboxymethyltransferase	Q1RAR3	yecP	6.61	37	1.34962e+07	6.08351e+06	4.66428e+06	8.2665e+06	6.11289e+06	4.26869e+06
Probable lipid kinase YegS	Q1R9Y4	UTI89_C2362	4.84	32	2.76959e+06	1.2191e+06	939400	1.70251e+06	430877	1.23082e+06
ATP-dependent dethiobiotin synthetase BioD	Q1RBK6	ynfK	6.2	25.4	2.49048e+07	1.81826e+07	7.89384e+06	1.5295e+07	1.20702e+07	7.415e+06
Putative binding protein YgiS	Q1R6X0	UTI89_C3447	7.71	63.1	1.23233e+06	1.51962e+06	400520	756823	0	0
D-erythrose-4-phosphate dehydrogenase	Q1R7A6		6.76	37.3	1.39342e+07	1.22653e+07	4.05124e+06	8.48294e+06	8.489e+06	6.84394e+06
5'-deoxynucleotidase YfbR	Q1R9C4	yfbR	5.59	22.7	2.51757e+06	2.36922e+06	2857940	1.52585e+06	2.18837e+06	8.32149e+06
Putative peptide/polyketide synthase	Q1RAC4	UTI89_C2222	6.19	352.7	2.33817e+07	2.36566e+07	8.72705e+06	1.41558e+07	5.82523e+06	2.07872e+06
Putative hemin receptor	Q1R1Z5	UTI89_P043	9.33	72	332156	186062	356288	200953	0	0
Endonuclease 8	Q1REK9	nei	8.18	29.8	859833	831311	0	521910	526145	0
Maltose regulon modulator	Q1RBH6	malY	5.35	43.5	3.27977e+06	3.77656e+06	556206	1.98245e+06	1.84568e+06	227919
Aspartate--ammonia ligase	Q1R4I8	asnA	5.64	36.7	2.64035e+07	2.2922e+07	7.84882e+06	1.60299e+07	1.17797e+07	5.81777e+06
Glutathionylspermidine synthase	Q1R707	gsp	5.22	70.7	5.58485e+07	1.56603e+07	6.11257e+06	3.38377e+07	1.45029e+07	1.74894e+06
Uncharacterized protein	Q1R2R2	UTI89_C4949	9.51	25.2	2.71376e+06	712066	921036	1.63819e+06	1.52704e+06	1.18718e+06
Uncharacterized protein	Q1RDC6	ycdY	4.27	20.7	2.81553e+06	1.55797e+06	1.13604e+06	1.69436e+06	856644	1.00045e+06
UPF0307 protein YjgA	Q1R322	yjgA	5.45	21.3	2.29997e+07	1.6798e+07	25783179	1.3846e+07	1.3959e+07	2.42739e+07
Uncharacterized protein	Q1RBJ4	UTI89_C1792	9.28	33.9	1.70575e+08	1.59468e+08	1.34686e+08	1.02896e+08	1.33089e+08	1.78257e+08
Uncharacterized protein	Q1R1P7	UTI89_P141	5.54	31.7	6.08283e+07	2.96723e+07	1.16081e+07	3.65618e+07	2.14021e+07	1.6369e+07
Oligoribonuclease	Q1R395	orn	5.07	25.3	2.01444e+06	447904	198248	1.21632e+06	521804	344230
Hydrogen peroxide-inducible genes activator	Q1R3U8	oxyR	6.52	35.9	2.8049e+07	2.4837e+07	5.70535e+06	1.68869e+07	1.01575e+07	7.38485e+06
Dihydropteroate synthase	Q1R6G1	folP	6.67	33.3	9.76988e+06	2.54476e+06	2.04233e+06	5.86974e+06	4.15873e+06	2.8971e+06
Formate-dependent phosphoribosylglycinamide formyltransferase	Q1RAT6	purT	5.69	42.4	1.95338e+06	3.03333e+06	4.47761e+06	1.18026e+06	222520	218463
Arabinose 5-phosphate isomerase	Q1R6D7	yrbH	6.98	36.1	2.17756e+07	1.62203e+07	5.19935e+06	1.30072e+07	8.08546e+06	4.33013e+06
Hypothetical transcriptional regulator YgbI	Q1R7W1	ygbI	7.8	28.6	4.20731e+06	2.21192e+06	435068	2.49915e+06	1.48627e+06	0
Uridine kinase	Q1RA04	udk	8.25	26.8	4.15684e+07	3.29293e+07	1.7016e+07	2.4705e+07	2.30099e+07	1.96927e+07
AlkB repair system protein for alkylated DNA and RNA	Q1R9K5	alkB	7.56	24	513117	0	0	303177	455900	0
Oligopeptide transport permease protein	Q1RCJ2	oppB	9.77	33.4	6.24938e+06	512637	2757162	3.70304e+06	5.83466e+06	4.00222e+06
Uncharacterized protein	Q1R4X7	yibQ	9.61	35.4	1.02989e+07	9.3533e+06	5.63005e+06	6.10779e+06	8.04346e+06	4.90719e+06
Uncharacterized protein	Q1R581	yhjD	9.73	37.9	9.81721e+06	8.21489e+06	5.58221e+06	5.79807e+06	5.87145e+06	7.58116e+06
Galactose-binding transport protein	Q1R9S3	mglB	6.02	35.7	1.44594e+06	4.50899e+06	703139	852269	2.0724e+06	2.10514e+06
Pantothenate kinase	Q1R5X9		6.81	36.3	6.41278e+06	1.7691e+06	619438	3.76863e+06	933708	1.17262e+06
Surface exclusion outer membrane protein	Q1R1Q3	traT	9.11	25.9	2.14823e+08	1.68644e+08	1.1773e+08	1.25803e+08	1.45632e+08	6.06073e+08
Uncharacterized protein	Q1R592	yhiE	9.29	23.6	2.07993e+06	0	675170	1.21955e+06	1.50522e+06	694795
Glycerol-3-phosphate dehydrogenase	Q1R9H6	glpA	6.54	59	4.23747e+06	2.55057e+06	757921	2.47633e+06	840699	0
Transcriptional regulatory protein	Q1REU0	dpiA	7.02	25.4	276135	0	0	161068	0	0
Protein-export membrane protein SecF	Q1RFD2	secF	5.49	36.9	2.80987e+07	1.93018e+07	1.13365e+07	1.63826e+07	1.77989e+07	9.87268e+06
Uncharacterized protein	Q1R672	UTI89_C3698	6.92	36.8	1.64728e+06	0	0	950543	1.06758e+06	228102
Bifunctional beta-keto ester reductase/2,5-diketo-D-gluconate reductase A	Q1R6Y5	dkgA	6.46	31.1	3.01304e+08	1.356e+08	84070093	1.73859e+08	1.01846e+08	7.80225e+07
Uncharacterized protein	Q1RFN4	ykgE	6.74	26	5.33949e+06	4.11671e+06	2.47031e+06	3.09447e+06	3.79609e+06	3.61473e+06
HTH-type transcriptional repressor NanR	Q1R6B4	nanR	6.47	29.5	441030	0	0	255159	0	0
Glucose-1-phosphate thymidylyltransferase	Q1RA36	rfbA	5.91	32.3	2.52818e+07	1.51135e+07	3.44074e+06	1.46546e+07	7.40973e+06	2.3989e+06
UDP-N-acetylenolpyruvoylglucosamine reductase	Q1R5X7	murB	6.19	37.8	4.55864e+06	1.14614e+06	452470	2.64033e+06	234667	527794
2',3'-cyclic-nucleotide 2'-phosphodiesterase	Q1R338	cpdB	5.73	70.8	1.93831e+06	1.57693e+06	1.64011e+06	1.11318e+06	852500	176031
Uncharacterized protein	Q1R2Q5	UTI89_C4956	8.03	47.2	6.00178e+06	5.14543e+06	4.14887e+06	3.43343e+06	4.77754e+06	3.4294e+06
Uncharacterized protein	Q1R6I1	yhbW	6.47	37.1	3.9107e+06	1.06573e+06	0	2.21993e+06	1.30769e+06	1.4227e+06
Ribonuclease T	Q1RBE3	rnt	5.39	23.5	602991	425933	305325	341708	247091	0
Trk system potassium uptake protein	Q1R463	trkH	9.04	52.9	2.56122e+06	1.56742e+06	1.87156e+06	1.45378e+06	1.3273e+06	2.0976e+06
Phosphoheptose isomerase	Q1RFU9	gmhA	7.83	27.1	9.92434e+06	5.53475e+06	4.05668e+06	5.63176e+06	7.00527e+06	5.97151e+06
Thioredoxin reductase	Q1RE26	trxB	5.64	39	2.37786e+07	1.43371e+07	9.629e+06	1.34761e+07	9.39323e+06	8.85965e+06
Probable Ni/Fe-hydrogenase 1 B-type cytochrome subunit	Q1RDN8	hyaC	9.22	27.6	4.54709e+06	3.7621e+06	4.174e+06	2.58169e+06	4.42506e+06	4.62012e+06
Maf-like protein YceF 1	Q1RD70		6.29	21.7	7.41199e+06	2.94857e+06	2.64329e+06	4.18147e+06	631646	2.88083e+06
Inner-membrane transport protein, Microcin 25	Q1RFH0	sbmA	8.47	46.7	685916	895531	0	383700	391301	277828
UPF0283 membrane protein YcjF	Q1RC43	ycjF	8.57	39.4	1.2899e+07	2.27871e+07	8.33485e+06	7.21466e+06	5.61547e+06	3.70657e+06
Putative aldo/keto reductase	Q1RFP4	UTI89_C0319	6.07	36.2	1.32443e+07	3.65611e+06	2.74561e+06	7.40959e+06	6.26283e+06	4.20362e+06
Right origin-binding protein	Q1R245	rob	7.23	33.1	1.12063e+08	8.73326e+07	2.9292e+07	6.26623e+07	4.12547e+07	2.39896e+07
Nicotinate-nucleotide pyrophosphorylase (Carboxylating)	Q1RG87	nadC	5.14	34.4	4.4968e+06	3.60079e+06	1.4864e+06	2.50749e+06	1.46583e+06	769811
Purine nucleoside phosphorylase DeoD-type	Q1R259	deoD	6.04	28	6.41937e+08	4.58763e+08	1.84797e+08	3.59372e+08	1.82633e+08	1.31563e+08
Uncharacterized protein	Q1RAD0	UTI89_C2216	6.3	177.3	1.43197e+07	1.23991e+07	4.62301e+06	7.9696e+06	3.6064e+06	987076
Lipopolysaccharide export system protein LptC	Q1R6D5	yrbK	6.81	21.7	3.75812e+06	2.74925e+06	3.96537e+06	2.08576e+06	5.10921e+06	3.48448e+06
Pyridoxine 5'-phosphate synthase	Q1R8G9	pdxJ	5.95	27	1.22239e+07	7.66904e+06	1.86392e+06	6.79289e+06	2.01501e+06	2.97326e+06
Putative glutamate--cysteine ligase 2	Q1REY3	ybdK	6.16	41.6	4.79343e+06	855777	1.6467e+06	2.65495e+06	2.39206e+06	1.80033e+06
Uncharacterized protein	Q1RBF1	ydhJ	8.24	32.9	1.97506e+06	1.41113e+06	1.76224e+06	1.0923e+06	2.66459e+06	3.12367e+06
Oligopeptide transport system permease protein oppC	Q1RCJ1	oppC	5.66	33	4.16217e+06	3.30208e+06	4.04986e+06	2.30201e+06	4.72658e+06	6.83551e+06
Citrate DASS carrier/transporter	Q1REV0	citT	8.65	53.1	768730	528715	385290	425375	417508	303452
Poly-alpha-2,8 sialosyl sialyltransferase	Q1R749	neuS	9.67	47.5	1.43739e+07	1.79523e+07	1.74381e+07	7.90417e+06	2.87431e+06	2.0137e+06
Putative acetyltransferase	Q1R430	yiiD	6.35	37.1	1.36056e+07	3.44646e+06	3.23696e+06	7.48885e+06	4.25453e+06	5.68962e+06
Putative glucose-6-phosphate 1-epimerase	Q1RB12	yeaD	6.35	33.4	1.03481e+08	6.79291e+07	2.08192e+07	5.67792e+07	3.63904e+07	1.90398e+07
Lipopolysaccharide core heptose(I) kinase	Q1R4W3	rfaP	9.66	31.4	7.64711e+06	5.15152e+06	5.91229e+06	4.1929e+06	7.0677e+06	6.73442e+06
Uracil-DNA glycosylase	Q1R8F2	ung	7.2	25.7	1.11171e+07	1.43389e+06	2.09211e+06	6.07328e+06	3.89591e+06	3.25759e+06
Putative esterase/lipase YbfF	Q1REN0	ybfF	6.21	28.4	8.53494e+06	5.82159e+06	727387	4.63983e+06	0	0
Muramoyltetrapeptide carboxypeptidase	Q1RCQ4	ldcA	6.52	33.5	1.42913e+06	503950	368436	775320	240623	0
Uridine phosphorylase	Q1R486	udp	6.54	23.4	1.79769e+08	1.06964e+08	5.38484e+07	9.77319e+07	6.768e+07	3.22475e+07
Methionyl-tRNA formyltransferase	Q1R645	fmt	6.04	34.2	2.33704e+06	1.56855e+06	241876	1.26445e+06	402093	590875
Uncharacterized protein	Q1R476	yigP	6.09	23.9	2.28784e+06	1.32142e+06	1.11187e+06	1.2368e+06	1.95577e+06	0
G/U mismatch-specific DNA glycosylase	Q1R6R1	ygjF	9.07	18.7	3.63549e+07	1.59571e+07	5.67156e+06	1.96056e+07	1.09328e+07	1.0765e+07
Ribose-5-phosphate isomerase A	Q1R7B6	rpiA	5.6	25.6	8.45208e+06	6.04222e+06	6.02115e+06	4.56175e+06	4.31465e+06	5.93419e+06
Hypothetical sugar kinase YeiI	Q1R9R1	yeiI	6.8	40.1	698031	0	580640	373432	818603	589218
Glyceraldehyde-3-phosphate dehydrogenase	Q1RB13	gapA	6.8	35.9	1.51344e+09	9.46547e+08	4.99013e+08	8.05687e+08	5.61784e+08	5.45797e+08
Uncharacterized protein	Q1R355	UTI89_C4805	5.67	47.8	637723	0	306829	336806	353341	0
Lipopolysaccharide core heptose(II)-phosphate phosphatase	Q1R9G3		9.17	22.4	1.65706e+06	2.50053e+06	2.31072e+06	873052	2.37237e+06	3.52783e+06
Maltodextrin-binding protein	Q1R3Q2	malE	6.13	43.3	8.05629e+07	5.78219e+07	2.1782e+07	4.23302e+07	1.8674e+07	9.0573e+06
S-adenosylmethionine:tRNA ribosyltransferase-isomerase	Q1RFD6	queA	5.24	39.4	1.64878e+06	1.30322e+06	688212	861808	323645	0
Mannose-6-phosphate isomerase	Q1RBI5	manA	5.45	42.8	6.03111e+06	4.63465e+06	1.18342e+06	3.1357e+06	596210	283505
Oxygen-dependent coproporphyrinogen-III oxidase	Q1R8T5	hemF	6.33	34.4	316288	226931	0	164879	0	0
Stringent starvation protein A	Q1R6B2	sspA	5.34	24.3	9.74677e+07	3.10556e+07	2.52765e+07	5.04765e+07	2.52824e+07	7.96221e+06
Polysialic acid transport ATP-binding protein kpsT	Q1R743	kpsT	9.26	24.9	652359	257132	0	336709	410038	897038
YjeG	Q1R3B9	fxsA	8.47	17.7	4.17303e+06	1.4029e+06	2.75469e+06	2.15411e+06	3.27293e+06	1.82178e+06
Uncharacterized protein	Q1R2C2	yfdQ2	5.11	30.4	7.80878e+06	4.2551e+06	3.57438e+06	4.02551e+06	2.66421e+06	3.06258e+06
Peptidase E	Q1R3S5	pepE	6.02	24.6	2.72257e+06	1.70768e+06	620409	1.40342e+06	779139	420776
Putative DEOR-type transcriptional regulator	Q1RC80	UTI89_C1556	6.3	27.5	2.66982e+06	0	0	1.37122e+06	642647	283783
Uncharacterized protein	Q1R4P8	yidQ	6.54	14.8	482265	0	261705	245647	296980	416914
Uncharacterized protein	Q1RAM9	yecA	4.63	25	1.05749e+07	5.07998e+06	1.77601e+06	5.35867e+06	3.15142e+06	4.45656e+06
Polyamine aminopropyltransferase	Q1RG70	speE	5.66	32.3	3.68337e+06	1.32257e+06	295328	1.87108e+06	1.21126e+06	399619
High-affinity glycine betaine-proline transport system protein	Q1R819	proX	6.73	37.4	468941	0	0	237166	624650	0
Uncharacterized protein	Q1R2Q4	UTI89_C4957	7.06	36.1	3.10528e+06	0	598627	1.56169e+06	712460	0
Ion-translocating oxidoreductase complex subunit G	Q1RBG5	rnfG	7.03	21.9	709545	711229	498700	356677	650484	0
Bis(5'-nucleosyl)-tetraphosphatase, symmetrical	Q1RGE8	apaH	5.53	31.5	1.49291e+06	502317	612618	751243	621383	291534
Putative polyketide synthase	Q1RAD1	UTI89_C2215	5.25	108.4	1.38936e+08	1.00404e+08	3.4031e+07	6.94163e+07	3.10933e+07	8.94527e+06
Hypothetical chaperone protein YegD	Q1RA01	yegD	5.57	51.8	989349	13625.4	109743	493343	774643	458171
5-methyltetrahydropteroyltriglutamate--homocysteine methyltransferase	Q1R4A4	metE	5.92	84.7	5.20832e+07	4.60624e+07	1.45499e+07	2.58656e+07	1.29408e+07	1.37686e+06
Uncharacterized protein	Q1R4A7	UTI89_C4390	6.01	32.1	6.6009e+06	803221	2.15007e+06	3.26153e+06	1.94132e+06	0
Lipid A 1-diphosphate synthase	Q1R9P5	UTI89_C2451	9.94	28.2	5.13914e+06	1.11639e+06	4.29195e+06	2.54635e+06	2.85555e+06	2.45964e+06
Putative protease YhbU	Q1R6I3	yhbU	7.56	37.9	3.45351e+06	1.23707e+06	0	1.7127e+06	0	0
33 kDa chaperonin	Q1R5N6	hslO	4.49	32.8	9.7881e+06	4.11118e+06	2.77108e+06	4.85492e+06	0	4.75467e+06
Pimeloyl-[acyl-carrier protein] methyl ester esterase	Q1R5M2	bioH	7.33	28.6	751192	346809	0	371291	0	0
Uncharacterized protein	Q1R7H1	ygeA	5.19	25.3	375336	285033	0	185202	0	0
TreB, trehalose specific PTS system enzyme II	Q1R316	treB	8.98	51.1	1.14915e+06	1.37304e+06	569425	566275	1.17882e+06	673234
UDP-galactose:(Galactosyl) LPS alpha1,2-galactosyltransferase	Q1R4W7	waaW	5.91	39.4	4.35321e+06	0	1.46326e+06	2.08847e+06	2.5777e+06	3.20751e+06
K(+)/H(+) antiporter NhaP2	Q1RCQ5	ycgO	5.22	62.2	2.93375e+06	1.95829e+06	1.60811e+06	1.41376e+06	2.72043e+06	1.75598e+06
tRNA 5-carboxymethoxyuridine methyltransferase	Q1RDT6	smtA	7.87	30.3	863348	0	0	413684	0	0
Leucine-responsive regulatory protein	Q1RE25	lrp	8.73	20.9	2.44558e+07	1.29287e+07	2.06723e+07	1.17042e+07	1.1694e+07	2.37294e+07
Cytochrome c biogenesis ATP-binding export protein CcmA	Q1R9L8	ccmA	6.89	22.9	737262	0	662310	350912	899395	706082
Uncharacterized protein	Q1RB11	yeaE	5.83	32.8	1.289e+06	871765	0	613285	0	0
Glutamine transport system permease protein glnP	Q1REB5	glnP	10.17	24.3	9.95733e+06	1.70441e+06	7.1711e+06	4.72233e+06	8.0999e+06	8.61528e+06
Primosomal replication protein N	Q1RF69	priC	10.2	20.3	3.04396e+06	1.22592e+06	1.58728e+06	1.43622e+06	1.54894e+06	1.42621e+06
Putative ABC-type transport protein YbbA	Q1RF33	ybbA	5.96	24.6	7.17876e+06	3.08629e+06	4.70315e+06	3.36664e+06	6.42696e+06	4.00547e+06
Molybdenum cofactor guanylyltransferase	Q1R458	mobA	6.42	21.8	3.64716e+06	3.3882e+06	408199	1.70891e+06	1.5296e+06	344744
Mrr protein	Q1R2F7	mrr	6.02	33.6	5.23244e+06	4.13361e+06	437273	2.4436e+06	701815	469642
sn-glycerol-3-phosphate-binding periplasmic protein UgpB	Q1R5H5	ugpB	6.95	48.5	9.21919e+06	8.22889e+06	6.07175e+06	4.23512e+06	3.99788e+06	1.82314e+06
Outer membrane protein F	Q1RDS8	ompF	4.97	39.3	4.48081e+08	4.85331e+08	5.12395e+08	2.05658e+08	2.78136e+08	2.84931e+08
Glycerol-3-phosphate transporter	Q1R9H7	glpT	8.7	50.3	1.10474e+07	6.2346e+06	8.82973e+06	5.04828e+06	7.70597e+06	4.7856e+06
Peptide deformylase	Q1R646	def	5.35	19.3	2.95911e+06	1.62585e+06	2.67597e+06	1.34002e+06	1.72182e+06	3.03083e+06
Uncharacterized protein	Q1R9Y3	UTI89_C2363	7.5	27.9	4.9948e+06	1.69186e+06	0	2.24627e+06	0	0
Uncharacterized protein	Q1R5W7	yjaH	6.93	26.5	6.28283e+06	9.10992e+06	6.50275e+06	2.80655e+06	8.34917e+06	7.4074e+06
Putative rhamnosyltransferase	Q1RA40	wciP	9.1	36.1	9.17181e+06	2.18814e+06	2.2332e+06	4.02115e+06	6.62093e+06	5.20304e+06
Thymidylate kinase	Q1RD57	tmk	5.52	23.7	2.56967e+06	1.09376e+06	777078	1.12855e+06	1.346e+06	0
Uridylate kinase	Q1RG18	pyrH	7.39	26	2.29575e+07	2.29199e+07	1.27494e+07	1.00278e+07	7.3095e+06	9.90301e+06
Carboxy-S-adenosyl-L-methionine synthase	Q1RAR4	yecO	5.77	27.8	1.42445e+07	6.60328e+06	3.59985e+06	6.19503e+06	3.18895e+06	2.29505e+06
tRNA/tmRNA (uracil-C(5))-methyltransferase	Q1R3U2	trmA	6.34	41.9	3.9068e+06	947295	518657	1.67601e+06	776721	161753
4-hydroxythreonine-4-phosphate dehydrogenase	Q1RGE5	pdxA	5.87	35.2	740434	0	0	314725	0	0
Putative peptide synthetase	Q1RAD6	UTI89_C2210	6.25	164.6	8.83868e+06	5.62773e+06	2.22108e+06	3.74154e+06	2.64046e+06	629189
Uncharacterized protein	Q1R5I4	UTI89_C3951	8.29	18.8	450104	0	115600	190092	484650	207124
Uncharacterized protein	Q1RBM3	ydfH	6.3	26.5	1.49979e+06	352142	0	628377	0	253347
Cell division protein FtsP	Q1R6X4	sufI	6.34	51.8	4.50984e+06	3.82872e+06	712583	1.86949e+06	2.53035e+06	0
Hypothetical oxidoreductase YgbJ	Q1R7W0	ygbJ	5.58	30.7	993939	0	0	407030	218979	0
Uncharacterized protein	Q1R2G7	yjiL	5.85	27.4	957688	631492	0	391593	758668	0
Putative phosphatase	Q1R4C2	yigB	6.74	27.1	8.17136e+06	6.30244e+06	137351	3.32019e+06	1.15918e+06	133568
Formyltetrahydrofolate deformylase	Q1RCK6	purU	7.01	31.9	7.31584e+06	2.06281e+06	1.86184e+06	2.97461e+06	2.41419e+06	2.00665e+06
AceBAK operon repressor	Q1R3T0	iclR	9.04	32.1	4.83182e+06	1.328e+06	503076	1.94059e+06	1.09698e+06	266503
Putative exported protein	Q1R227	UTI89_P011	5.73	19.2	2.77369e+06	209911	2.06833e+06	1.10695e+06	2.0431e+06	1.55959e+06
Uncharacterized protein	Q1R8H4	UTI89_C2880	8.97	24.4	2.50922e+06	1.61619e+06	1.40421e+06	993829	1.16704e+06	1.01632e+06
Molybdopterin biosynthesis mog protein	Q1RGJ4	mogA	5.02	21.4	1.53545e+06	810863	644324	604421	1.1847e+06	886601
Hydrogenase 1 maturation protease	Q1RDN7	hyaD	4.92	21.5	3.92438e+06	3.39533e+06	1.06005e+06	1.53318e+06	965236	722786
Uncharacterized protein	Q1R8U0	yfeX	5.54	33.9	2.5564e+07	8.57564e+06	1803450	9.875e+06	3.11898e+06	770823
Pyridoxal phosphate homeostasis protein	Q1R776	yggS	6.55	25.8	6.20218e+06	2.53264e+06	1.50775e+06	2.38595e+06	1.47818e+06	1.7886e+06
Glycerol-3-phosphate acyltransferase	Q1R6S2	ygiH	9.64	22.2	1.16223e+06	0	1.45506e+06	445605	417406	646061
Putative acyl-CoA dehydrogenase	Q1RAC8	UTI89_C2218	7.24	37.3	1.85322e+07	8.28518e+06	5.95379e+06	6.99272e+06	6.0769e+06	5.83514e+06
Putative beta1,3-glucosyltransferase	Q1R4W8	waaV	8.62	38.7	1.89559e+06	0	0	699870	523008	585008
Elongation factor Tu 1	Q1R5Y2	tufB	5.45	43.3	4.25369e+06	1.04394e+06	305559	1.53732e+06	1.53593e+06	0
Hypothetical ABC transporter ATP-binding protein yehX	Q1R9U4	yehX	6.09	34.4	1.26337e+06	0	0	452920	729982	0
UxuR uxu operon transcriptional regulator	Q1R2J1	uxuR	5.31	29.2	1.9813e+06	904919	500789	683738	517811	410958
Uncharacterized protein	Q1R970	yfcZ	4.67	11.3	3.03676e+06	1.12263e+06	471448	1.03733e+06	718132	478373
Uncharacterized protein	Q1REA3	ybiV	6.16	30.5	6.71744e+06	2.55927e+06	1160481	2.28899e+06	1.24653e+06	266019
Sec-independent protein translocase protein TatB	Q1R473	tatB	5.22	18.4	1.72432e+07	6.87825e+06	6.07854e+06	5.7865e+06	1.0738e+07	1.04789e+07
Uncharacterized protein	Q1RE57	ybjS	8.82	40.6	4.95013e+07	2.05822e+07	2.96909e+07	1.65697e+07	1.058e+07	1.07364e+07
Uncharacterized protein	Q1RFS3	UTI89_C0289	5.5	81.8	1.17709e+06	691054	0	390912	264854	5.65203e+08
Putative thioesterase	Q1RAD9	UTI89_C2207	6.37	27.3	3.06691e+07	8.42274e+06	4.79468e+06	9.86471e+06	5.67021e+06	5.62302e+06
3-isopropylmalate dehydratase large subunit	Q1RGC5	leuC	6.32	49.9	495273	169065	242752	159463	295382	0
23S rRNA (uracil(747)-C(5))-methyltransferase RlmC	Q1RE66	rumB	7.02	42	795313	0	0	242782	0	0
Putative outer membrane channel protein	Q1RC71	UTI89_C1565	6.43	49.1	2.26308e+06	1.27306e+06	1.56565e+06	690227	1.33237e+06	1.38366e+06
Uncharacterized protein	Q1RFN2	ykgG	8.98	31	6.08091e+06	8.70427e+06	2.30687e+06	1.83292e+06	1.96148e+06	1.07338e+06
Putative 3-hydroxyacyl-CoA dehydrogenase	Q1RAC6	UTI89_C2220	6.6	32.5	6.51674e+07	3.76723e+07	2.02889e+07	1.94574e+07	2.00432e+07	1.21558e+07
Uncharacterized protein	Q1RC34	ynaI	9.39	38.8	6.67522e+06	2.19698e+06	4.45681e+06	1.97106e+06	4.90857e+06	6.50184e+06
5'/3'-nucleotidase SurE	Q1R7U7		5.77	26.9	3.27865e+06	476470	0	953024	1.89946e+06	267048
GTPase Era	Q1R8G7	era	7.25	33.8	1.23337e+07	1.01752e+06	639833	3.52244e+06	2.94132e+06	1.80722e+06
UDP-N-acetylglucosamine 2-epimerase	Q1R4F1	rffE	6.42	43.7	3.37044e+06	746066	0	952046	685425	207414
4-methyl-5(B-hydroxyethyl)-thiazole monophosphate biosynthesis enzyme	Q1RFB6	thiJ	5.38	21	6.24359e+06	1.24125e+06	908852	1.75977e+06	1.30767e+06	542855
Putative lipid A-core surface polymer ligase	Q1R4W9	waaL	8.85	46.7	1.59974e+06	1.22034e+06	2.49087e+06	451040	1.33494e+06	1.61303e+06
UidR transriptional regulator	Q1R2V0	UTI89_C4911	9.85	31.1	2.14236e+07	6.62348e+06	4.56018e+06	5.96889e+06	5.02984e+06	3.236e+06
DeoR transcriptional repressor	Q1RE85	deoR	7.93	28.5	6.32122e+06	3.07179e+06	4.27923e+06	1.70948e+06	5.8457e+06	5.21103e+06
Sorbitol-6-phosphate 2-dehydrogenase	Q1R7Z5	srlD	6.33	27.8	1.79856e+06	957962	0	474395	0	0
Uncharacterized protein	Q1RCB4	UTI89_C1522	7.65	24.4	4.08634e+06	762323	1.40491e+06	1.07134e+06	1.46409e+06	1.44642e+06
D-allose-binding periplasmic protein	Q1R3H3	yjcX	6.87	33.1	1.71028e+06	1.1647e+06	889173	440748	703390	1.11723e+06
Uncharacterized protein	Q1R264	yjjI	6.09	58	1.39554e+06	345797	0	325545	1.03924e+06	209614
Putative thioredoxin-like protein	Q1RF36	ybbN	4.63	33	1.39963e+06	1.74645e+06	187081	322991	189602	244853
RNA pyrophosphohydrolase	Q1R7I3	nudH	10.04	20.8	816597	0	422363	186205	0	0
Anaerobic glycerol-3-phosphate dehydrogenase subunit B	Q1R9H5		5.96	45.3	2.39308e+06	3.78164e+06	307433	541815	104158	0
HTH-type transcriptional repressor PurR	Q1RBD7	purR	6.74	38.1	1.30856e+06	511982	0	294324	341931	363521
Flagellin	Q1RAL7	fliC	4.97	60	9.73852e+07	1.0291e+08	6.7544e+07	2.10133e+07	2.29634e+07	9.66341e+06
Major pilin subunit PapA	Q1R2W6	papA	6.54	18.9	8.62983e+06	1.11606e+07	1.24534e+07	1.69386e+06	8.44977e+06	1.05241e+07
Putrescine-binding periplasmic protein	Q1RD31	potD	5.39	38.8	1.08532e+06	459631	783900	210902	1.25837e+06	1.61149e+06
Leucyl/phenylalanyl-tRNA--protein transferase	Q1RE29	aat	7.5	26.7	2.67895e+06	397506	3.11217e+06	516283	3.74397e+06	3.84834e+06
UDP-N-acetyl-D-mannosamine dehydrogenase	Q1R4F0	wecC	5.31	45.8	1.67e+06	0	0	319971	793086	283986
Peptidyl-prolyl cis-trans isomerase	Q1R5T4	slyD	5.05	20.8	3.22511e+06	946214	1.84134e+06	557287	601234	925212
Hypothetical transcriptional regulator YihW	Q1R441	yihW	5.97	28.7	1.82133e+06	311384	444807	307573	305922	514179
DNA polymerase III, delta prime subunit	Q1RD56	holB	7.21	36.9	1.86603e+06	0	0	290229	326004	0
Hypothetical transcriptional regulator YkgD	Q1RFN5	ykgD	7.25	33.4	880989	355181	0	130679	0	0
Hypothetical oxidoreductase YdgJ	Q1RBH4	ydgJ	6	39.6	484229	0	0	71572.7	0	0
Hypothetical oxidoreductase YeiT	Q1R9S7	yeiT	5.39	44.2	4.22169e+06	1.3498e+06	0	580639	1.75412e+06	734505
Hypothetical transcriptional regulator YhiF	Q1R5A9	yhiF	8.72	20.4	4.12791e+06	0	0	557718	2.31875e+06	738602
Flap endonuclease Xni	Q1R7P3		6.84	28.1	2.53695e+06	657086	875476	338063	1.32243e+06	421843
Uncharacterized protein	Q1R6Z5	yghZ	7.02	38.9	2.5981e+06	2.43937e+06	952451	297369	2.45082e+06	445384
Uncharacterized protein	Q1RDE8	UTI89_C1133	5.17	43.1	3.15785e+06	1.28937e+06	570207	307961	985160	169277
Protein GrpE	Q1R8B1	grpE	4.72	21.8	3.64542e+06	4.66931e+06	990027	271056	786953	751687
3-hydroxydecanoyl-[acyl-carrier-protein] dehydratase	Q1RDR0	fabA	6.57	19	1.18887e+07	7.91804e+06	8.98885e+06	770402	9.22829e+06	1.05205e+07
Uncharacterized protein	Q1R3Z8	yiiQ	9.25	21.6	6.42234e+07	4.60421e+07	2.41851e+07	3.93538e+06	9.19996e+06	4.25416e+06
Uncharacterized protein	Q1R963	UTI89_C2635	9.8	12.2	1.65724e+08	1.23958e+08	9.37398e+07	7.89294e+06	7.13518e+06	6.27955e+06
Flagellar L-ring protein	Q1RD78	flgH	8.69	25.2	1.14948e+07	1.48512e+07	5.85798e+06	235220	0	0
Uncharacterized protein	Q1RAZ8	yoaF	7.78	8.9	1.05971e+06	0	0	0	919806	237942
Uncharacterized protein	Q1REL3	ybgI	5.19	26.9	228171	761226	198471	0	611853	542648
FAD:protein FMN transferase	Q1R9K2	apbE	5.87	38.5	1.0079e+06	2.00346e+06	1.57681e+06	0	2.32396e+06	3.29744e+06
Uncharacterized protein	Q1R5I8	yhhW	5.43	26.3	666795	0	603354	0	500056	469446
Putative enzyme	Q1RAY6	UTI89_C2002	7.08	70.3	31593.3	18944.4	26125.6	0	38276.9	0
Putative transport system permease protein	Q1R9P0	yejE	9.26	38.1	519065	0	413544	0	812510	476240
Dihydroorotase	Q1RD95	pyrC	6.11	38.8	177804	0	0	0	283766	0
Uncharacterized protein	Q1R2K4	yjhA	8.69	28.3	321173	407338	340882	0	307233	218676
Uncharacterized protein	Q1R258	yjjJ	6.67	49.4	380198	0	0	0	0	0
P pilus adhesin PapG protein	Q1R2X4	papG	7.77	37.2	301085	0	0	0	0	0
Tat proofreading chaperone DmsD	Q1RBK8	ynfI	4.97	23.7	285388	0	0	0	0	0
Putative amidase	Q1RET5	ybeM	6.29	28.8	120158	0	0	0	0	0
Putative member of ShlA/HecA/FhaA exoprotein family	Q1R2R5	UTI89_C4946	5.81	332.3	549469	313091	273147	0	182350	0
DNA polymerase	Q1RGD9	polB	6.92	90	155859	794867	1.03731e+06	0	0	0
Uncharacterized protein	Q1R9N5	yejH	7.58	66.5	679349	555154	588368	0	0	47645.1
Hydrogenase isoenzymes nickel incorporation protein hypB	Q1R7X2	hypB	5.63	31.5	2.1767e+06	0	0	0	0	0
Ribosomal RNA large subunit methyltransferase A	Q1RAW8	rrmA	7.5	30.4	614248	0	0	0	0	0
Ribonuclease D	Q1RAZ0	rnd	5.31	42.7	974491	179562	0	0	0	0
Acriflavine resistance protein E	Q1R663	acrE	6.57	41.3	702723	505079	669090	0	0	0
Spermidine-putrescine transport system permease	Q1RD29	potB	9.57	32.2	589794	123406	609422	0	0	491050
Lysine-arginine-ornithine-binding periplasmic protein	Q1R9A3	argT	5.86	28	663221	822379	1.11404e+06	0	1.2293e+06	900487
3-keto-L-gulonate-6-phosphate decarboxylase UlaD	Q1R364	ulaD	5.49	25.1	3.55467e+06	2.03687e+06	1.87561e+06	0	0	1.22107e+06
Methylenetetrahydrofolate reductase	Q1R3X1	metF	6.65	33.1	1.5216e+06	1.14926e+06	0	0	0	0
Carbonic anhydrase	Q1RG65	yadF	6.65	25.1	574239	832543	907161	0	567881	796054
Deoxyguanosinetriphosphate triphosphohydrolase	Q1RG28	dgt	7.46	59.3	245192	745798	983118	0	129508	0
Transcriptional Regulatory protein QseB	Q1R6W7	ygiX	7.06	24.7	1.08423e+06	0	0	0	0	0
Positive response regulator for pho regulon	Q1RFE3	phoB	5.67	26.4	549612	0	0	0	0	0
Putative 2-component transcriptional regulator	Q1REZ3	ylcA	5.52	25.4	1.34034e+06	0	0	0	0	0
Tsr, subunit of methyl-accepting chemotaxis protein I	Q1R2F3	tsr	4.97	59.4	83283.9	1.50141e+06	693058	0	0	0
